# Supplementary material for: Electrochemical oxygenation of sulfides with molecular oxygen or water: switchable preparation of sulfoxides and sulfones
Source: Royal Society of Chemistry journal article supplement (doi:10.1039/d1ob01756j), 2021-01-01
Supplement: d1ob01756j1.pdf [file d1ob01756j1.pdf]

# Supporting Information

## Electrochemical oxygenation of sulfides with water or molecular oxygen: switchable preparation of sulfones and sulfoxides

Qi Xue,<sup>‡a</sup> Qing Sun,<sup>‡a</sup> Ting-Ting Zhang,<sup>a</sup> Yang Li,<sup>\*a,b</sup> and Jin-Heng Li<sup>\*abc</sup>

<sup>a</sup>Key Laboratory of Jiangxi Province for Persistent Pollutants Control and Resources Recycle, Nanchang Hangkong University, Nanchang 330063, China

<sup>b</sup>State Key Laboratory of Applied Organic Chemistry, Lanzhou University, Lanzhou 730000, China

<sup>c</sup>School of Chemistry and Chemical Engineering, Henan Normal University, Xinxiang, 453007, China

<sup>‡</sup>These authors contributed equally to this work.

E-mail: [liyang8825490@126.com](mailto:liyang8825490@126.com) and [jhli@hnu.edu.cn](mailto:jhli@hnu.edu.cn)

### List of Contents

|                                                                                      |                |
|--------------------------------------------------------------------------------------|----------------|
| <b>(A) Typical experimental procedure</b>                                            | <b>S2-S4</b>   |
| <b>(B) Water as oxygen source for selective synthesis of sulfoxides and sulfones</b> | <b>S5-S6</b>   |
| <b>(C) Analytical data</b>                                                           | <b>S7-S22</b>  |
| <b>(D) Spectra</b>                                                                   | <b>S23-S68</b> |
| <b>(E) Reference</b>                                                                 | <b>S69</b>     |

## (A) Typical Experimental Procedure

### (a) General

The  $^1\text{H}$  and  $^{13}\text{C}$  NMR spectra were recorded in  $\text{CDCl}_3$  solvent on a NMR spectrometer using TMS as internal standard. HRMS was measured on an electrospray ionization (ESI) apparatus using time-of-flight (TOF) mass spectrometry. Melting points are uncorrected. The instrument for electrolysis is DC power source (PM3005B) (made in China). Cyclic voltammograms were obtained on a CHI 605E potentiostat. The anode electrode is graphite electrodes ( $\Phi$  6mm $\times$ 80mm) and cathode electrode is graphite electrodes ( $\Phi$  6mm $\times$ 80mm).

### (b) General procedures for electrochemical oxidation of sulfides to prepare sulfoxides

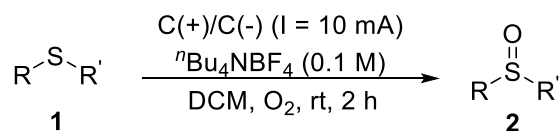

To an undivided three-necked bottle (10 mL) were added **1** (0.2 mmol),  ${}^n\text{Bu}_4\text{NBF}_4$  (0.1 M) and DCM (4 mL). The bottle was equipped with graphite rod electrode as cathode and graphite rod electrode as anode under oxygen. The reaction mixture was stirred and electrolyzed at a constant current of 10 mA at room temperature for 2 h until complete consumption of **1** as monitored by TLC and/or GC-MS analysis. After the reaction was finished, the solution was extracted with EtOAc (3 $\times$ 10 mL). The combined organic layer was dried with  $\text{Na}_2\text{SO}_4$ , filtered and concentrated in vacuum. The resulting residue was purified by silica gel column chromatography (hexane/ethyl acetate) to afford the desired products **2**.

### (c) General procedures for electrochemical oxidation of sulfides to prepare sulfones

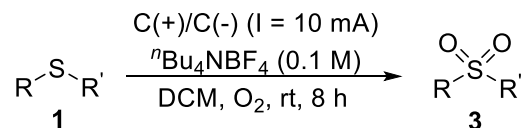

To an undivided three-necked bottle (10 mL) were added **1** (0.2 mmol),  ${}^n\text{Bu}_4\text{NBF}_4$  (0.1 M) and DCM (4 mL). The bottle was equipped with graphite rod electrode as cathode and graphite rod electrode as anode under oxygen. The reaction mixture was stirred and electrolyzed at a constant current of 10 mA at room temperature for 8 h until complete consumption of **1** as monitored by TLC and/or GC-MS analysis. After the reaction was finished, the solution was extracted with EtOAc (3×10 mL). The combined organic layer was dried with  $\text{Na}_2\text{SO}_4$ , filtered and concentrated in vacuum. The resulting residue was purified by silica gel column chromatography (hexane/ethyl acetate) to afford the desired products **3**.

#### (d) Experimental device

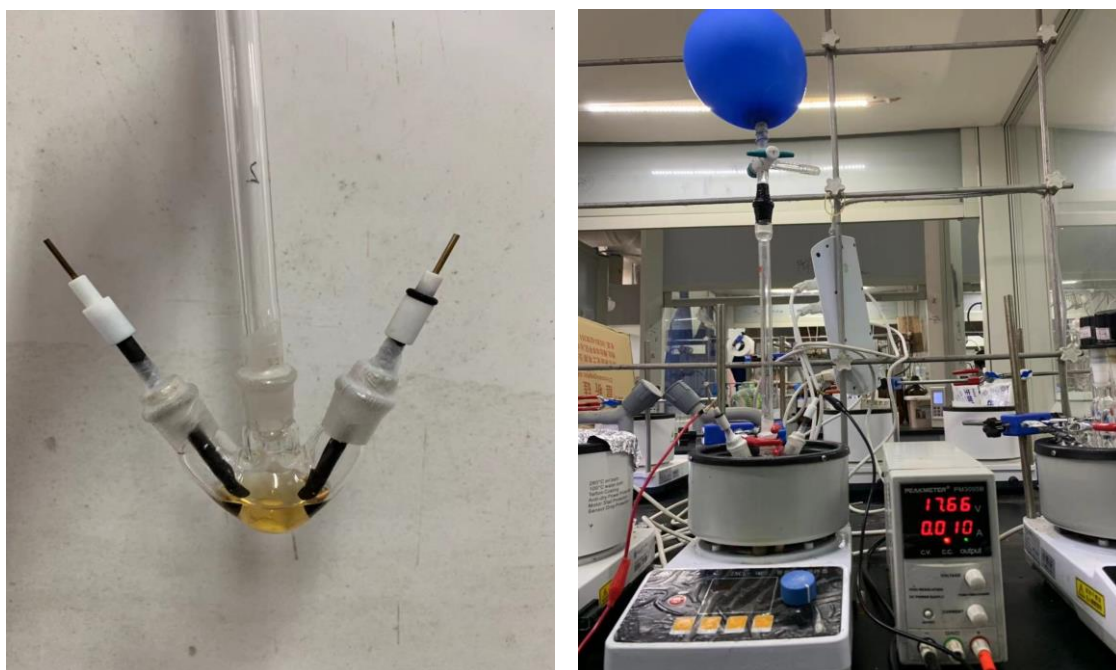

#### (e) Cyclic voltammograms device and Cyclic voltammogram analysis

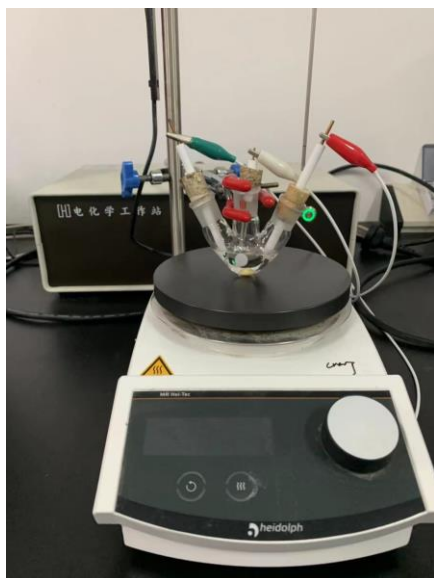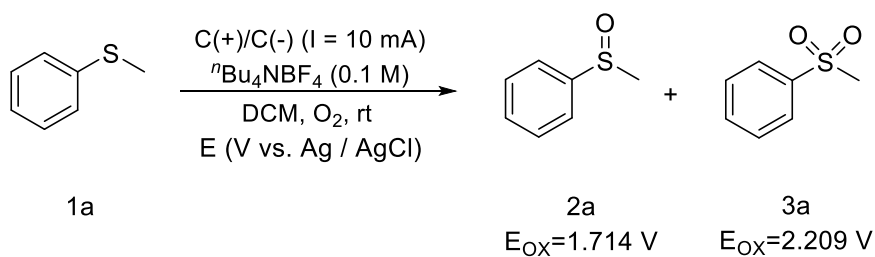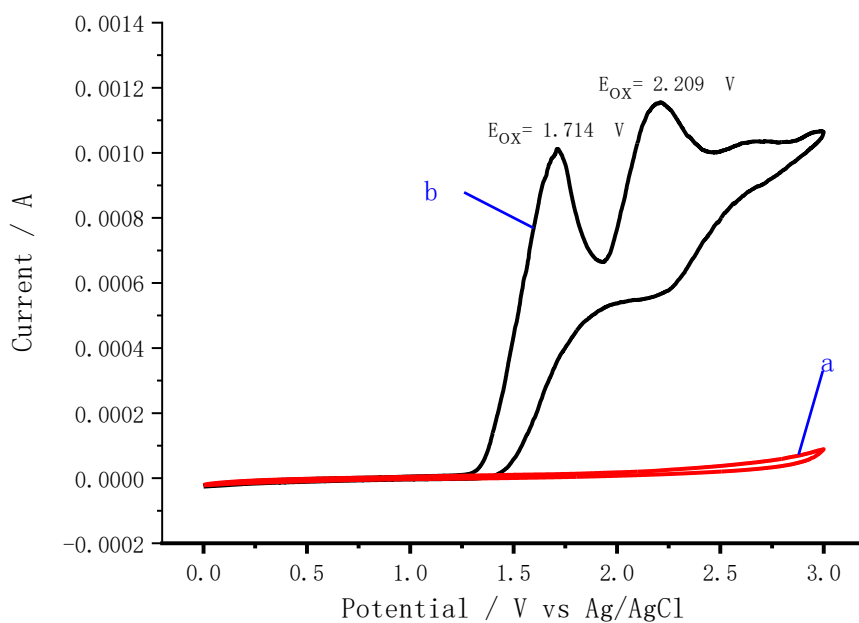

**Figure S1. Cyclic voltammogram curves.** Using GC disk as working electrode, Pt slice, and Ag/AgCl as counter and reference electrode at 100 mV/s scan rate. **Curve a:**  ${}^n\text{Bu}_4\text{NBF}_4$  (0.1 M) and  $\text{CH}_3\text{CN}$  (6 mL); **Curve b:** 1a (0.05 M),  ${}^n\text{Bu}_4\text{NBF}_4$  (0.1 M) and  $\text{CH}_3\text{CN}$  (6 mL).

## (B) Water as oxygen source for selective synthesis of sulfoxides and sulfones

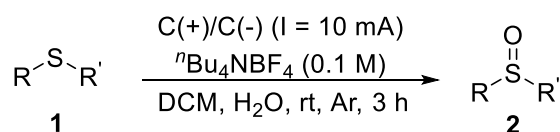

To an undivided three-necked bottle (10 mL) were added **1** (0.2 mmol), H<sub>2</sub>O (30eq), <sup>n</sup>Bu<sub>4</sub>NBF<sub>4</sub> (0.1 M) and DCM (4 mL). The bottle was equipped with graphite rod electrode as cathode and graphite rod electrode as anode under argon. The reaction mixture was stirred and electrolyzed at a constant current of 10 mA at room temperature for 3 h until complete consumption of **1** as monitored by TLC and/or GC-MS analysis. After the reaction was finished, the solution was extracted with EtOAc (3×10 mL). The combined organic layer was dried with Na<sub>2</sub>SO<sub>4</sub>, filtered and concentrated in vacuum. The resulting residue was purified by silica gel column chromatography (hexane/ethyl acetate) to afford the desired products **2**.

## (c) General procedures for electrochemical oxidation of sulfides to prepare sulfones

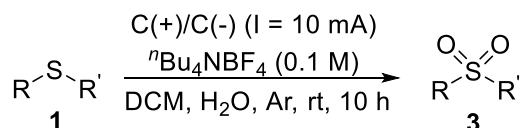

To an undivided three-necked bottle (10 mL) were added **1** (0.2 mmol), H<sub>2</sub>O (30eq), <sup>n</sup>Bu<sub>4</sub>NBF<sub>4</sub> (0.1 M) and DCM (4 mL). The bottle was equipped with graphite rod electrode as cathode and graphite rod electrode as anode under argon. The reaction mixture was stirred and electrolyzed at a constant current of 10 mA at room temperature for 10 h until complete consumption of **1** as monitored by TLC and/or GC-MS analysis. After the reaction was finished, the solution was extracted with

EtOAc (3×10 mL). The combined organic layer was dried with Na<sub>2</sub>SO<sub>4</sub>, filtered and concentrated in vacuum. The resulting residue was purified by silica gel column chromatography (hexane/ethyl acetate) to afford the desired products **3**.

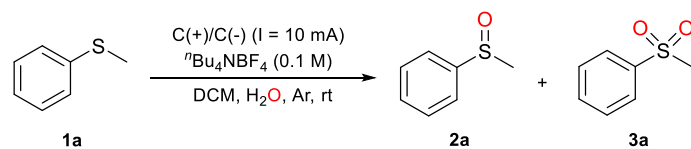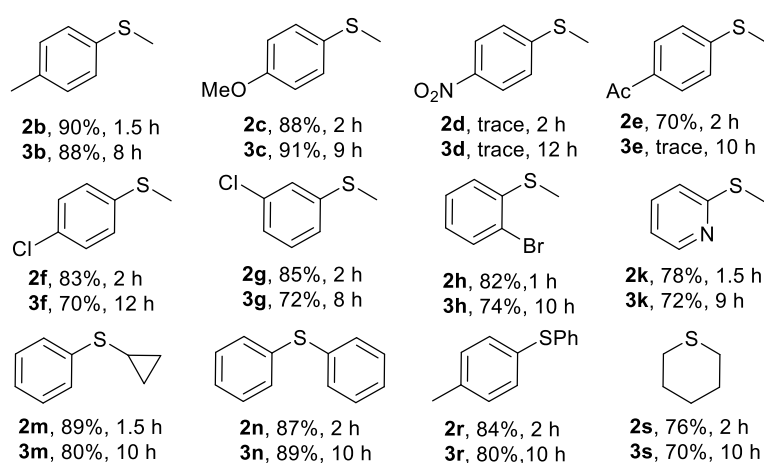

Reaction conditions: undivided cell, graphite rod anode, graphite plate cathode, constant current= 10 mA, **1a** (0.2 mmol), H<sub>2</sub>O (30 equiv.), *n*Bu<sub>4</sub>NBF<sub>4</sub> (0.1 M), DCM (4 ml), Ar (1 atm), room temperature.

### (C) Analytical data

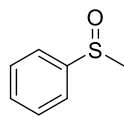

#### (methylsulfinyl)benzene(2a)<sup>(5)</sup>

26.0 mg, 93% yield; Yellow oil;

<sup>1</sup>H NMR (500 MHz, CDCl<sub>3</sub>)  $\delta$ : 7.66 (d, J = 7.5 Hz, 2H), 7.55-7.51 (m, 3H), 2.73 (s, 3H); <sup>13</sup>C NMR (125 MHz, CDCl<sub>3</sub>)  $\delta$ : 145.7, 131.0, 129.3, 123.5, 43.9; LRMS (EI, 70eV) (*m/z*, %) 140 (M<sup>+</sup>, 90), 125 (100), 97 (77), 81 (8).

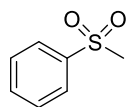

#### (methylsulfonyl)benzene (3a)<sup>(5)</sup>

28.1 mg, 90% yield; Yellow soild;

<sup>1</sup>H NMR (500 MHz, CDCl<sub>3</sub>)  $\delta$ : 7.96 (d, J = 7.5 Hz, 2H), 7.67 (t, J = 7.5 Hz, 1H), 7.58 (t, J = 7.5 Hz, 2H), 3.06 (s, 3H); <sup>13</sup>C NMR (125 MHz, CDCl<sub>3</sub>)  $\delta$ : 140.5, 133.6, 130.9, 129.39, 127.3, 44.4; LRMS (EI, 70eV) (*m/z*, %) 156 (M<sup>+</sup>, 56), 141 (60), 94 (100), 89 (28).

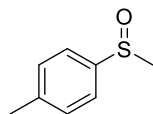

#### 1-methyl-4-(methylsulfinyl)benzene (2b)<sup>(6)</sup>

30.2 mg, 98% yield; Yellow soild;

<sup>1</sup>H NMR (500 MHz, CDCl<sub>3</sub>)  $\delta$ : 7.54 (d, J = 8.0 Hz, 2H), 7.33 (d, J = 8.0 Hz, 2H), 2.71 (s, 3H), 2.42 (s, 3H); <sup>13</sup>C NMR (125 MHz, CDCl<sub>3</sub>)  $\delta$ : 142.5, 141.5, 130.0, 123.5, 43.9, 21.3; LRMS (EI, 70eV) (*m/z*, %) 154 (M<sup>+</sup>, 63), 139 (100), 111 (16), 91 (38).

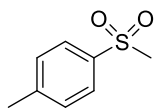

**1-methyl-4-(methylsulfonyl)benzene (3b)** <sup>(6)</sup>

32.6 mg, 96% yield; Yellow solid;

<sup>1</sup>H NMR (500 MHz, CDCl<sub>3</sub>) δ: 7.82 (d, J = 8.5 Hz, 2H), 7.37 (d, J = 8.0 Hz, 2H), 3.04 (s, 3H), 2.45 (s, 3H); <sup>13</sup>C NMR (125 MHz, CDCl<sub>3</sub>) δ: 144.5, 137.6, 129.8, 127.2, 44.5, 21.5; LRMS (EI, 70eV) (*m/z*, %) 170 (M<sup>+</sup>, 30), 155 (28), 107 (29), 91 (100).

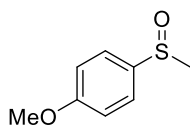

**1-methoxy-4-(methylsulfonyl)benzene (2c)** <sup>(3)</sup>

29.9 mg, 88% yield; White solid;

<sup>1</sup>H NMR (500 MHz, CDCl<sub>3</sub>) δ: 7.87 (d, J = 8.5 Hz, 2H), 7.03 (d, J = 8.5 Hz, 2H), 3.89 (s, 3H), 3.03 (s, 3H); <sup>13</sup>C NMR (125 MHz, CDCl<sub>3</sub>) δ: 163.7, 132.3, 129.6, 114.5, 55.7, 44.9; LRMS (EI, 70eV) (*m/z*, %) 170 (M<sup>+</sup>, 26), 155 (100), 123 (13), 92 (8).

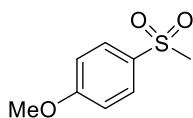

**1-methoxy-4-(methylsulfonyl)benzene (3c)** <sup>(2)</sup>

33.5 mg, 90% yield; Colorless solid;

<sup>1</sup>H NMR (500 MHz, CDCl<sub>3</sub>) δ: 7.87 (d, J = 8.5 Hz, 2H), 7.03 (d, J = 9.0 Hz, 2H), 3.89 (s, 3H), 3.04 (s, 3H); <sup>13</sup>C NMR (125 MHz, CDCl<sub>3</sub>) δ: 163.6, 132.1, 129.4, 114.39, 55.6, 44.7; LRMS (EI, 70eV) (*m/z*, %) 186 (M<sup>+</sup>, 78), 171 (100), 123 (64) 107 (70).

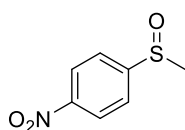



**1-(methylsulfinyl)-4-nitrobenzene (2d)** <sup>(5)</sup>

35.2mg, 95% yield; Colorless solid ;

<sup>1</sup>H NMR (500 MHz, CDCl<sub>3</sub>) δ: 8.40 (d, J = 8.5 Hz, 2H), 7.85 (d, J = 8.5 Hz, 2H), 2.81 (s, 3H); <sup>13</sup>C NMR (125 MHz, CDCl<sub>3</sub>) δ: 153.2, 149.5, 124.6, 124.4, 43.8; LRMS (EI, 70eV) (*m/z*, %) 185 (M<sup>+</sup>, 100), 170 (44), 140 (34), 112 (20).

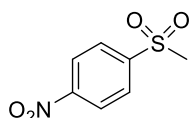

**1-(methylsulfonyl)-4-nitrobenzene (3d)** <sup>(5)</sup>

35.0 mg, 87% yield; Colorless solid ;

<sup>1</sup>H NMR (500 MHz, CDCl<sub>3</sub>) δ: 8.44 (d, J = 9.0 Hz, 2H), 8.17 (d, J = 9.0 Hz, 2H), 3.13 (s, 3H); <sup>13</sup>C NMR (125 MHz, CDCl<sub>3</sub>) δ:150.8, 145.9, 128.9, 124.6, 44.3; LRMS (EI, 70eV) (*m/z*, %) 201 (M<sup>+</sup>, 18), 186 (24), 139 (100), 122 (54).

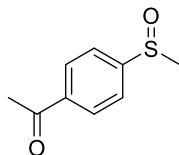

**1-(4-(methylsulfinyl)phenyl)ethan-1-one (2e)** <sup>(3)</sup>

29.1 mg, 80% yield; White solid;

<sup>1</sup>H NMR (500 MHz, CDCl<sub>3</sub>) δ: 8.11 (d, J = 8.0 Hz, 2H), 7.75 (d, J = 8.0 Hz, 2H), 2.77 (s, 3H), 2.66 (s, 3H); <sup>13</sup>C NMR (125 MHz, CDCl<sub>3</sub>) δ: 197.0, 150.9, 139.0, 129.1, 123.7, 43.8, 26.8; LRMS (EI, 70eV) (*m/z*, %) 182 (M<sup>+</sup>, 66), 167 (100), 152 (76), 139 (27).

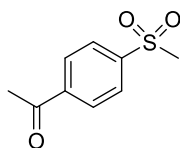

**1-(4-(methylsulfonyl)phenyl)ethan-1-one (3e)** <sup>(2)</sup>

32.9 mg, 83% yield; Colorless solid;

$^1\text{H}$  NMR (500 MHz,  $\text{CDCl}_3$ )  $\delta$ : 8.10 (m, 4H), 3.10 (s, 3H), 2.68 (s, 3H);  $^{13}\text{C}$  NMR (125 MHz,  $\text{CDCl}_3$ )  $\delta$ : 196.6, 144.1, 140.8, 129.1, 127.7, 44.2, 26.9; LRMS (EI, 70eV) ( $m/z$ , %) 198 ( $\text{M}^+$ , 15), 183 (100), 121 (54), 91 (12).

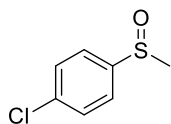

**1-chloro-4-(methylsulfinyl)benzene (2f)**<sup>(3)</sup>

29.9 mg, 86% yield; Yellow solid;

$^1\text{H}$  NMR (500 MHz,  $\text{CDCl}_3$ )  $\delta$ : 7.60 (d,  $J = 8.5$  Hz, 2H), 7.52 (d,  $J = 9.0$  Hz, 2H), 2.72 (s, 3H);  $^{13}\text{C}$  NMR (125 MHz,  $\text{CDCl}_3$ )  $\delta$ : 144.2, 137.2, 129.6, 124.9, 44.02, . LRMS (EI, 70eV) ( $m/z$ , %) 176 ( $\text{M}^{++2}$ , 48), 174 ( $\text{M}^+$ , 58), 159 (100), 131 (46), 111 (26).

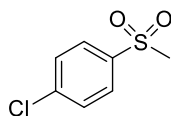

**1-chloro-4-(methylsulfonyl)benzene (3f)**<sup>(2)</sup>

30.4 mg, 80% yield; Colorless solid;

$^1\text{H}$  NMR (500 MHz,  $\text{CDCl}_3$ )  $\delta$ : 7.89 (d,  $J = 8.5$  Hz, 2H), 7.56 (d,  $J = 8.5$  Hz, 2H), 3.07 (s, 3H);  $^{13}\text{C}$  NMR (125 MHz,  $\text{CDCl}_3$ )  $\delta$ : 140.2, 138.9, 129.5, 128.7, 44.3; LRMS (EI, 70eV) ( $m/z$ , %) 192 ( $\text{M}^{++2}$ , 36) 190 ( $\text{M}^+$ , 40), 175 (48), 127 (48), 111 (100).

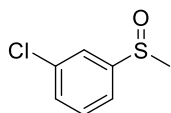

**1-chloro-3-(methylsulfinyl)benzene (2g)**<sup>(2)</sup>

31.3 mg, 90% yield; Yellow oil;

$^1\text{H}$  NMR (500 MHz,  $\text{CDCl}_3$ )  $\delta$ : 7.67 (s, 1H), 7.51-7.49 (m, 1H), 7.47 (d,  $J = 5.0$  Hz,

2H), 2.75 (s, 3H).;  $^{13}\text{C}$  NMR (125 MHz,  $\text{CDCl}_3$ )  $\delta$ : 147.8, 135.7, 131.2, 130.5, 123.6, 121.6, 44.0; LRMS (EI, 70eV) ( $m/z$ , %) 176 ( $\text{M}^{+2}$ , 60) 174 ( $\text{M}^{+}$ , 80), 159 (100), 131 (71) 111 (45).

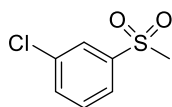

**1-chloro-3-(methylsulfonyl)benzene (3g)** <sup>(2)</sup>

29.6 mg, 78% yield; Yollow Soild;

$^1\text{H}$  NMR (500 MHz,  $\text{CDCl}_3$ )  $\delta$ : 7.94 (s, 1H), 7.84 (d,  $J = 8.0$  Hz, 1H), 7.64 (d,  $J = 7.5$  Hz, 1H), 7.54 (t,  $J = 7.5$  Hz, 1H), 3.08 (s, 3H).;  $^{13}\text{C}$  NMR (125 MHz,  $\text{CDCl}_3$ )  $\delta$ : 142.1, 135.5, 133.8, 130.7, 127.4, 125.4, 44.3; LRMS (EI, 70eV) ( $m/z$ , %) 190 ( $\text{M}^{+}$ , 43), 175 (36), 128 (54), 111 (100).

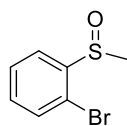

**1-bromo-2-(methylsulfinyl)benzene (2h)** <sup>(2)</sup>

34.9 mg, 80% yield; Yollow oil;

H NMR (500 MHz,  $\text{CDCl}_3$ )  $\delta$ : 7,95 (d,  $J = 7.5$  Hz 1H), 7.61-7.56 (m, 2H), 7.39 (t,  $J = 6.5$  Hz 1H), 2.83 (s, 3H).;  $^{13}\text{C}$  NMR (125 MHz,  $\text{CDCl}_3$ )  $\delta$ : 145.3, 132.9, 132.2, 128.7, 125.6, 118.4, 41.9; LRMS (EI, 70eV) ( $m/z$ , %) 220 ( $\text{M}^{+2}$ , 88) 218 ( $\text{M}^{+}$ , 68), 205 (100), 139 (52), 96 (74).

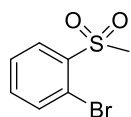

**1-bromo-2-(methylsulfonyl)benzene (3h)** <sup>(2)</sup>

36.5 mg, 78% yield; Yollow Soild;

$^1\text{H}$  NMR (500 MHz,  $\text{CDCl}_3$ )  $\delta$ : 8.20 (d,  $J = 7.5$  Hz, 1H), 7.78 (d,  $J = 7.5$  Hz, 1H), 7.52 (m, 2H), 3.29 (s, 3H);  $^{13}\text{C}$  NMR (125 MHz,  $\text{CDCl}_3$ )  $\delta$ : 139.6, 135.4, 134.7, 131.1, 128.1, 120.6, 42.3; LRMS (EI, 70eV) ( $m/z$ , %) 236 ( $\text{M}^+ + 2$ , 56) 234 ( $\text{M}^+$ , 74), 172 (52), 155 (100), 143 (22).

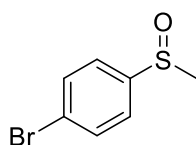

**1-bromo-4-(methylsulfinyl)benzene (2i)** <sup>(3)</sup>

36.6 mg, 84%; White solid;

$^1\text{H}$  NMR (500 MHz,  $\text{CDCl}_3$ )  $\delta$ : 7.67 (d,  $J = 8.5$  Hz, 2H), 7.53 (d,  $J = 8.0$  Hz, 2H), 2.73 (s, 3H).;  $^{13}\text{C}$  NMR (125 MHz,  $\text{CDCl}_3$ )  $\delta$ : 144.7, 132.5, 125.4, 125.1, 43.8; LRMS (EI, 70eV) ( $m/z$ , %) 220 ( $\text{M}^+ + 2$ , 38) 218 ( $\text{M}^+$ , 54), 205 (100), 175 (17), 96 (48).

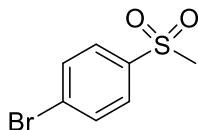

**1-bromo-4-(methylsulfonyl)benzene (3i)** <sup>(2)</sup>

37.4 mg, 80% yield; White solid ;

$^1\text{H}$  NMR (500 MHz,  $\text{CDCl}_3$ )  $\delta$ : 7.82 (d,  $J = 8.5$  Hz, 2H), 7.72 (d,  $J = 8.5$  Hz, 2H), 3.06 (s, 3H);  $^{13}\text{C}$  NMR (125 MHz,  $\text{CDCl}_3$ )  $\delta$ : 139.5, 132.6, 128.9, 128.9, 44.4. LRMS (EI, 70eV) ( $m/z$ , %) 236 ( $\text{M}^+ + 2$ , 48) 234 ( $\text{M}^+$ , 54), 221 (52), 173 (56), 143 (100).

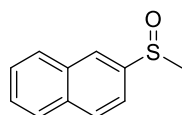

**2-(methylsulfinyl)naphthalene (2j)** <sup>(3)</sup>

31.9 mg, 84% yield; Yellow solid;

$^1\text{H}$  NMR (500 MHz,  $\text{CDCl}_3$ )  $\delta$ : 8.22 (s, 1H), 7.99 (d,  $J = 8.5$  Hz, 1H), 7.94 (t,  $J = 5.5$

Hz 1H), 7.91 (t, J = 4.0 Hz 1H), 7.62-7.58 (m, 3H), 2.79 (s, 3H); <sup>13</sup>C NMR (125 MHz, CDCl<sub>3</sub>) δ: 142.7, 134.4, 132.9, 129.6, 128.5, 128.0, 127.7, 127.3, 124.0, 119.4, 43.7; LRMS (EI, 70eV) (*m/z*, %) 190 (M<sup>+</sup>, 62), 175 (100), 147 (45), 115 (50).

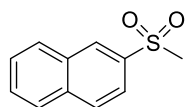

**2-(methylsulfonyl)naphthalene (3j)** <sup>(6)</sup>

21.4 mg, 52% yield; Yellow Solid;

<sup>1</sup>H NMR (500 MHz, CDCl<sub>3</sub>) δ: 8.52 (s, 1H), 7.99 (t, J = 9.0 Hz, 2H), 7.93-7.89 (m, 2H), 7.67 (t, J = 7.0 Hz, 1H), 7.62 (t, J = 7.0 Hz, 1H), 3.12 (s, 3H); <sup>13</sup>C NMR (125 MHz, CDCl<sub>3</sub>) δ: 137.4, 135.3, 132.2, 129.8, 129.4, 129.3, 129.0, 128.0, 127.8, 122.13, 44.6; LRMS (EI, 70eV) (*m/z*, %) 206 (M<sup>+</sup>, 54), 191 (18), 127 (100), 115 (30).

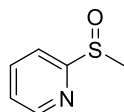

**2-(methylsulfonyl)pyridine (2k)** <sup>(3)</sup>

21.3 mg, 76% yield; Yellow oil;

<sup>1</sup>H NMR (500 MHz, CDCl<sub>3</sub>) δ: 8.63 (d, J = 4.0 Hz, 1H), 8.04 (d, J = 8.0 Hz, 1H), 7.96 (t, J = 7.5 Hz, 1H), 7.41-7.38 (m, 1H), 2.86 (s, 3H); <sup>13</sup>C NMR (125 MHz, CDCl<sub>3</sub>) δ: 165.9, 149.5, 138.1, 124.6, 119.2, 41.3; LRMS (EI, 70eV) (*m/z*, %) 141 (M<sup>+</sup>, 53), 125 (24), 93 (100), 80 (8).

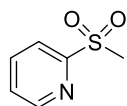

**2-(methylsulfonyl)pyridine (3k)** <sup>(4)</sup>

23.4 mg, 75% yield; Yellow oil;

<sup>1</sup>H NMR (500 MHz, CDCl<sub>3</sub>) δ: 8.75 (d, J = 4.5 Hz, 1H), 8.10 (d, J = 7.5 Hz, 1H), 7.99

(t, J = 7.5 Hz, 1H), 7.60-7.57 (m, 1H), 3.25 (s, 3H).  $\delta$ : 157.7, 149.9, 138.2, 127.4, 120.9, 39.9; LRMS (EI, 70eV) ( $m/z$ , %) 157 ( $M^+$ , 2), 95 (80), 93 (100), 80 (2).

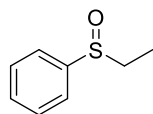

**(ethylsulfinyl)benzene (2l)** <sup>(3)</sup>

27.1 mg, 88% yield; Colorless oil;

$^1\text{H}$  NMR (500 MHz,  $\text{CDCl}_3$ )  $\delta$ : 7.61 (d, J = 7.0 Hz, 2H), 7.52 (d, J = 9.0 Hz, 3H), 2.93-2.75 (m, 2H), 1.19 (d, J = 7.5 Hz, 3H);  $^{13}\text{C}$  NMR (125 MHz,  $\text{CDCl}_3$ )  $\delta$ : 143.2, 130.8, 129.1, 124.1, 50.2, 5.9; LRMS (EI, 70eV) ( $m/z$ , %) 154 ( $M^+$ , 302), 126 (100), 97 (23), 81 (3).

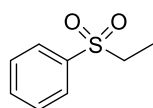

**(ethylsulfonyl)benzene (3l)** <sup>(5)</sup>

28.9 mg, 85% yield; Yellow oil;

$^1\text{H}$  NMR (500 MHz,  $\text{CDCl}_3$ )  $\delta$ : 7.91 (d, J = 7.5 Hz, 2H), 7.67 (t, J = 7.5 Hz, 1H), 7.58 (t, J = 8.0 Hz, 2H), 3.15-3.10 (m, 2H), 1.28 (t, J = 7.0 Hz, 3H);  $^{13}\text{C}$  NMR (125 MHz,  $\text{CDCl}_3$ )  $\delta$ : 138.4, 133.6, 129.2, 128.1, 50.5, 7.3; LRMS (EI, 70eV) ( $m/z$ , %) 170 ( $M^+$ , 53), 141 (35), 94 (100), 81 (1).

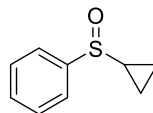

**(cyclopropylsulfinyl)benzene (2m)** <sup>(3)</sup>

31.5 mg, 95% yield; Yellow oil;

$^1\text{H}$  NMR (500 MHz,  $\text{CDCl}_3$ )  $\delta$ : 7.68-7.66 (m, 2H), 7.54-7.50 (m, 3H), 2.29-2.24 (m, 1H), 1.27-1.22 (m, 2H), 1.06-1.01 (m, 1H), 0.98-0.92 (m, 1H);  $^{13}\text{C}$  NMR (125 MHz,

CDCl<sub>3</sub>)  $\delta$ : 144.8, 130.9, 129.1, 123.9, 33.7, 3.3, 2.7; LRMS (EI, 70eV) (*m/z*, %) 166 (M<sup>+</sup>, 26), 125 (100), 117 (40), 97 (27).

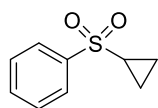

**(cyclopropylsulfonyl)benzene (3m)**<sup>(2)</sup>

31.3 mg, 86% yield; Yellow oil;

<sup>1</sup>H NMR (500 MHz, CDCl<sub>3</sub>)  $\delta$ : 7.91-7.89 (m, 2H), 7.64 (t, J = 7.5 Hz, 1H), 7.56 (t, J = 8.0 Hz, 2H), 2.50-2.45 (m, 1H), 1.36-1.32 (m, 2H), 1.0-1.01 (m, 2H); <sup>13</sup>C NMR (125 MHz, CDCl<sub>3</sub>)  $\delta$ : 140.6, 133.3, 129.1, 127.4, 32.8, 5.8; LRMS (EI, 70eV) (*m/z*, %) 182 (M<sup>+</sup>, 55), 141 (100), 117 (46), 91 (16).

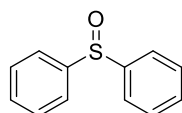

**Sulfinyldibenzene (2n)**<sup>(2)</sup>

37.2 mg, 92% yield; Yellow soild;

<sup>1</sup>H NMR (500 MHz, CDCl<sub>3</sub>)  $\delta$ : 7.64 (d, J = 7.5 Hz, 4H), 7.43 (d, J = 6.5 Hz, 6H); <sup>13</sup>C NMR (125 MHz, CDCl<sub>3</sub>)  $\delta$ : 145.4, 130.9, 129.2, 124.6; LRMS (EI, 70eV) (*m/z*, %) 202 (M<sup>+</sup>, 100), 173 (21), 154 (72), 109 (82).

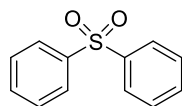

**Sulfonyldibenzene (3n)**<sup>(1)</sup>

39.2 mg, 90% yield; Yellow soild;

<sup>1</sup>H NMR (500 MHz, CDCl<sub>3</sub>)  $\delta$ : 7.95 (d, J = 7.5 Hz, 4H), 7.56 (t, J = 7.0 Hz, 2H), 7.50 (t, J = 7.5 Hz, 4H); <sup>13</sup>C NMR (125 MHz, CDCl<sub>3</sub>)  $\delta$ : 141.5, 133.1, 129.2, 127.6; LRMS (EI, 70eV) (*m/z*, %) 218 (M<sup>+</sup>, 24), 152 (5), 125 (100), 97 (22).

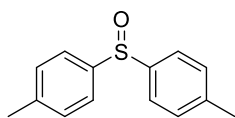

**4,4'-sulfinylbis(methylbenzene) (2o)**<sup>(2)</sup>

41.4 mg, 90% yield; White solid;

<sup>1</sup>H NMR (500 MHz, CDCl<sub>3</sub>) δ: 7.51 (d, J = 8.0 Hz, 4H), 7.24 (d, J = 8.0 Hz, 4H), 2.34 (s, 6H); <sup>13</sup>C NMR (125 MHz, CDCl<sub>3</sub>) δ: 142.6, 141.3, 129.8, 124.7, 21.3; LRMS (EI, 70eV) (*m/z*, %) 230 (M<sup>+</sup>, 64), 182 (100), 123 (86), 91 (52).

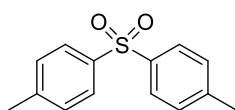

**4,4'-sulfonylbis(methylbenzene) (3o)**<sup>(1)</sup>

39.4 mg, 80% yield; White solid;

<sup>1</sup>H NMR (500 MHz, CDCl<sub>3</sub>) δ: 7.81 (d, J = 8.0 Hz, 4H), 7.28 (d, J = 8.0 Hz, 4H), 2.38 (s, 6H); <sup>13</sup>C NMR (125 MHz, CDCl<sub>3</sub>) δ: 143.9, 139.0, 129.8, 127.5, 21.5; LRMS (EI, 70eV) (*m/z*, %) 246 (M<sup>+</sup>, 32), 139 (100), 107 (12), 91 (35).

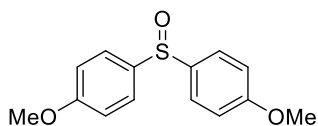

**4,4'-sulfinylbis(methoxybenzene) (2p)**<sup>(2)</sup>

46.3 mg, 89% yield; Yellow solid;

<sup>1</sup>H NMR (500 MHz, CDCl<sub>3</sub>) δ: 7.53 (d, J = 8.5 Hz, 4H), 6.95 (d, J = 8.5 Hz, 4H), 3.80 (s, 6H); <sup>13</sup>C NMR (125 MHz, CDCl<sub>3</sub>) δ: 161.7, 136.8, 126.7, 114.6, 55.4; LRMS (EI, 70eV) (*m/z*, %) 262 (M<sup>+</sup>, 17), 214 (100), 199 (48), 123 (68).

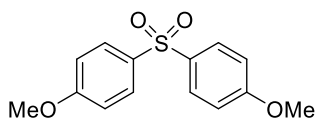

**4,4'-sulfonylbis(methoxybenzene) (3p)**<sup>(1)</sup>



43.4 mg, 78% yield; Yellow solid;

$^1\text{H}$  NMR (500 MHz,  $\text{CDCl}_3$ )  $\delta$ : 8.10 (d,  $J = 39.5$  Hz, 4H), 3.10 (s, 3H), 2.68 (s, 3H);

$^{13}\text{C}$  NMR (125 MHz,  $\text{CDCl}_3$ )  $\delta$ : 196.6, 144.1, 140.8, 129.1, 127.7, 44.2, 26.9; LRMS (EI, 70eV) ( $m/z$ , %) 278 ( $\text{M}^+$ , 60), 155 (96), 123 (100), 107 (17).

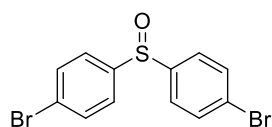

**4,4'-sulfinylbis(bromobenzene) (2q)** <sup>(2)</sup>

60.9 mg, 85% yield; White solid;

$^1\text{H}$  NMR (500 MHz,  $\text{CDCl}_3$ )  $\delta$ : 7.60-7.59 (m, 4H), 7.51-7.49 (m, 4H);  $^{13}\text{C}$  NMR (125 MHz,  $\text{CDCl}_3$ )  $\delta$ : 144.3, 132.6, 126.0, 125.8; LRMS (EI, 70eV) ( $m/z$ , %) 360 ( $\text{M}^+$ , 38), 312 (88), 281 (82), 108 (100).

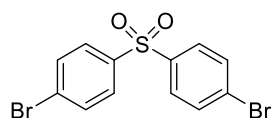

**4,4'-sulfonylbis(bromobenzene) (3q)** <sup>(1)</sup>

62.8 mg, 84% yield; Colorless solid;

$^1\text{H}$  NMR (500 MHz,  $\text{CDCl}_3$ )  $\delta$ : 7.80-7.77 (m, 4H), 7.65 (d,  $J = 8.5$  Hz, 4H);  $^{13}\text{C}$  NMR (125 MHz,  $\text{CDCl}_3$ )  $\delta$ : 140.2, 132.7, 129.2, 128.8; LRMS (EI, 70eV) ( $m/z$ , %) 376 ( $\text{M}^+$ , 28), 205 (100), 167 (22), 149 (12).

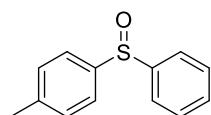

**1-methyl-4-(phenylsulfinyl)benzene (2r)** <sup>(2)</sup>

37.2 mg, 86% yield; White solid;

$^1\text{H}$  NMR (500 MHz,  $\text{CDCl}_3$ )  $\delta$ : 7.63-7.61 (m, 2H), 7.53 (d,  $J = 8.5$  Hz, 2H), 7.44-7.39

(m, 3H), 7.23 (d, J = 8.0 Hz, 2H), 2.33 (s, 3H);  $^{13}\text{C}$  NMR (125 MHz,  $\text{CDCl}_3$ )  $\delta$ : 145.6, 142.3, 141.4, 130.7, 129.8, 129.1, 124.7, 124.4; LRMS (EI, 70eV) ( $m/z$ , %) 216 ( $\text{M}^+$ , 100), 168 (92), 123 (70), 107 (74).

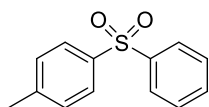

**1-methyl-4-(phenylsulfonyl)benzene (3r)**<sup>(1)</sup>

38.5 mg, 83% yield; Colorless solid;

$^1\text{H}$  NMR (500 MHz,  $\text{CDCl}_3$ )  $\delta$ : 7.94-7.92 (m, 2H), 7.83 (d, J = 8.0 Hz, 2H), 7.54 (t, J = 7.5 Hz, 1H), 7.49 (t, J = 7.5 Hz, 2H), 7.29 (d, J = 8.0 Hz, 2H), 2.39 (s, 3H).;  $^{13}\text{C}$  NMR (125 MHz,  $\text{CDCl}_3$ )  $\delta$ : 144.1, 142.0, 138.6, 133.0, 129.9, 129.2, 127.7, 127.5, 21.5; LRMS (EI, 70eV) ( $m/z$ , %) 232 ( $\text{M}^+$ , 76), 139 (96), 107 (100), 91 (38).

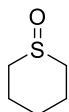

**tetrahydro-2H-thiopyran 1-oxide (2s)**<sup>(5)</sup>

18.4mg, 78% yield; Yellow Solid;

$^1\text{H}$  NMR (500 MHz,  $\text{CDCl}_3$ )  $\delta$ : 2.89 (t, J = 11.0 Hz, 2H), 2.78-2.74 (m, 2H), 2.26-2.23 (m, 2H), 1.68-1.65 (m, 2H), 1.61-1.58 (m, 2H);  $^{13}\text{C}$  NMR (125 MHz,  $\text{CDCl}_3$ )  $\delta$ : 48.8, 24.5, 18.9; LRMS (EI, 70eV) ( $m/z$ , %) 118 ( $\text{M}^+$ , 100), 101 (34), 90 (24), 82 (2).

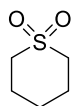

**tetrahydro-2H-thiopyran 1,1-dioxide (3s)**<sup>(5)</sup>

18.2 mg, 68% yield; White solid;

$^1\text{H}$  NMR (500 MHz,  $\text{CDCl}_3$ )  $\delta$ : 3.0 (t, J = 6.0 Hz, 4H), 2.12-2.07 (m, 4H), 1.67-1.64 (m, 2H);  $^{13}\text{C}$  NMR (125 MHz,  $\text{CDCl}_3$ )  $\delta$ : 52.1, 24.2, 23.7; LRMS (EI, 70eV) ( $m/z$ , %) 134

(M<sup>+</sup>, 100), 118 (38), 106 (32), 80 (14).

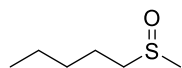

### 2-(methylsulfonyl)pyridine (2t)

14.6 mg, 62% yield; Yellow oil;

<sup>1</sup>H NMR (500 MHz, CDCl<sub>3</sub>) δ: 2.77-2.72 (m, 1H), 2.67-2.61 (m, 1H), 2.57 (s, 3H), 1.80-1.73 (m, 2H), 1.48-1.42 (m, 2H), 1.40-1.37 (m, 2H), 0.92 (t, J = 7.0 Hz, 3H).;

<sup>13</sup>C NMR (125 MHz, CDCl<sub>3</sub>) δ: 54.7, 38.5, 30.8, 22.2, 22.2, 13.7; LRMS (EI, 70eV)

(*m/z*, %) 135(M<sup>+</sup>, 2), 117 (100), 103 (2), 80 (1); HRMS *m/z* (ESI) for calcd C<sub>6</sub>H<sub>14</sub>OS

[M+H]<sup>+</sup> 135.0838, found 135.0838.

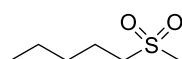

### 1-(methylsulfonyl)pentane (3t)

16.0 mg, 60% yield; Yellow oil;

<sup>1</sup>H NMR (500 MHz, CDCl<sub>3</sub>) δ: <sup>1</sup>H NMR (500 MHz, CDCl<sub>3</sub>) : 3.03-3.00 (m, 2H), 2.90 (s, 3H), 1.88-1.82 (m, 2H), 1.47-1.41 (m, 2H), 1.40-1.34 (m, 2H), 0.93 (t, J = 7.5

Hz, 3H).; <sup>13</sup>C NMR (125 MHz, CDCl<sub>3</sub>) : 54.6, 40.3, 30.3, 22.0, 22.0, 13.6; LRMS (EI,

70eV) (*m/z*, %) 151 (M<sup>+</sup>, 2), 135 (13), 94 (16), 81 (100); HRMS *m/z* (ESI) for calcd

C<sub>6</sub>H<sub>14</sub>O<sub>2</sub>S [M+H]<sup>+</sup> 151.0787, found 151.0787.

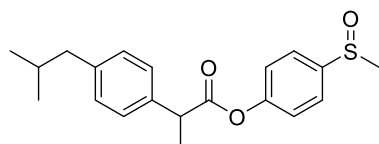

### 4-(methylsulfonyl)phenyl 2-(4-isobutylphenyl)propanoate (4a)

51.6 mg, 75% yield; Yellow solid; mp: 169.0-171.2 °C (uncorrected);

<sup>1</sup>H NMR (500 MHz, CDCl<sub>3</sub>) δ: 7.63 (d, J = 8.0 Hz, 2H), 7.29 (d, J = 8.0 Hz, 2H),

7.18-7.14 (m, 4H), 3.97-3.93 (m, 1H), 2.70 (s, 3H), 2.47 (d, J = 7.0 Hz, 2H), 1.89-1.84 (m, 1H), 1.61 (d, J = 7.0 Hz, 3H), 0.91 (d, J = 6.5 Hz, 6H); <sup>13</sup>C NMR (125 MHz, CDCl<sub>3</sub>) δ: 172.8, 152.9, 142.6, 141.0, 136.7, 129.6, 127.1, 124.8, 122.6, 45.2, 45.0, 44.0, 30.1, 22.3, 18.4; LRMS (EI, 70eV) (*m/z*, %) 344 (M<sup>+</sup>, 8), 188 (32), 161 (100), 140 (24); HRMS *m/z* (ESI) for calcd C<sub>20</sub>H<sub>24</sub>O<sub>3</sub>S [M+H]<sup>+</sup> 345.1519, found 345.1518.

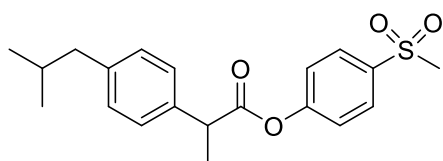

**4-(methylsulfonyl)phenyl 2-(4-isobutylphenyl)propanoate (4b)**

29.5 mg, 41% yield; White solid; mp; 193.2-195.0 °C (uncorrected);

<sup>1</sup>H NMR (500 MHz, CDCl<sub>3</sub>) δ: 7.63 (d, J = 8.0 Hz, 2H), 7.29 (d, J = 8.0 Hz, 2H), 7.18-7.14 (m, 4H), 3.97-3.93 (m, 1H), 2.70 (s, 3H), 2.47 (d, J = 7.0 Hz, 2H), 1.89-1.84 (m, 1H), 1.61 (d, J = 7.0 Hz, 3H), 0.91 (d, J = 6.5 Hz, 6H); <sup>13</sup>C NMR (125 MHz, CDCl<sub>3</sub>) δ: 172.8, 152.9, 142.6, 141.0, 136.7, 129.6, 127.1, 124.8, 122.6, 45.2, 45.0, 44.0, 30.1, 22.3, 18.4; LRMS (EI, 70eV) (*m/z*, %) 360 (M<sup>+</sup>, 1), 161 (100), 117 (16), 91 (10); HRMS *m/z* (ESI) for calcd C<sub>20</sub>H<sub>24</sub>O<sub>4</sub>S [M+H]<sup>+</sup> 361.1468, found 361.1464.

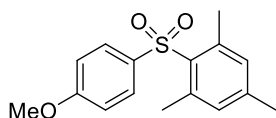

**2-((4-methoxyphenyl)sulfonyl)-1,3,5-trimethylbenzene (4c)**

37.7 mg, 65% yield; Yellow oil;

<sup>1</sup>H NMR (500 MHz, CDCl<sub>3</sub>) δ: 7.73 (d, J = 8.5 Hz, 2H), 6.93 (d, J = 7.0 Hz, 4H), 3.83 (s, 3H), 2.60 (s, 6H), 2.28 (s, 3H); <sup>13</sup>C NMR (125 MHz, CDCl<sub>3</sub>) δ: 162.7, 143.0,

139.7, 135.2, 134.5, 132.1, 128.4, 114.0, 55.6, 22.8, 20.9; LRMS (EI, 70eV) (*m/z*, %) 290 ( $M^+$ , 46), 272 (84), 165 (100), 91 (82).

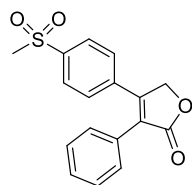

**4-(4-(methylsulfonyl)phenyl)-3-phenylfuran-2(5H)-one (4d)<sup>(4)</sup>**

35.8 mg, 57% yield; White solid;

<sup>1</sup>H NMR (500 MHz, CDCl<sub>3</sub>)  $\delta$ : 7.92 (d, *J* = 8.0 Hz, 2H), 7.52 (d, *J* = 8.0 Hz, 2H), 7.40 (s, 5H), 5.20 (s, 2H), 3.08 (s, 3H).; <sup>13</sup>C NMR (125 MHz, CDCl<sub>3</sub>)  $\delta$ : 172.5, 153.4, 141.9, 136.2, 129.5, 129.1, 129.1, 129.0, 129.0, 128.5, 128.1, 70.3, 44.3; LRMS (EI, 70eV) (*m/z*, %) 314 ( $M^+$ , 48), 257 (68), 131 (100), 103 (30).

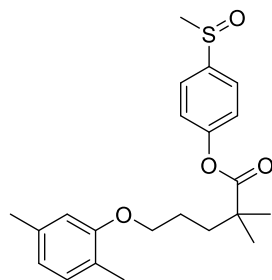

**4-(methylsulfinyl)phenyl 5-(2,5-dimethylphenoxy)-2,2-dimethylpentanoate (4e)**

47.3 mg, 61% yield; Brown oil;

<sup>1</sup>H NMR (500 MHz, CDCl<sub>3</sub>)  $\delta$ : 7.65 (d, *J* = 8.5 Hz, 2H), 7.20 (d, *J* = 8.0 Hz, 2H), 7.00 (d, *J* = 7.0 Hz, 1H), 6.67 (d, *J* = 7.0 Hz, 1H), 6.62 (s, 1H), 3.99 (t, *J* = 5.5 Hz, 2H), 2.72 (s, 3H), 2.30 (s, 3H), 2.17 (s, 3H), 1.92-1.86 (m, 4H), 1.38 (s, 6H); <sup>13</sup>C NMR (125 MHz, CDCl<sub>3</sub>)  $\delta$ : 176.0, 156.8, 153.1, 142.7, 136.5, 130.4, 124.9, 123.6, 122.8, 120.9, 112.0, 67.6, 44.2, 42.6, 37.1, 25.3, 25.1, 15.8; LRMS (EI, 70eV) (*m/z*, %) 388 ( $M^+$ , 1), 272 (13), 233 (15), 83 (100); HRMS *m/z* (ESI) for calcd C<sub>22</sub>H<sub>28</sub>O<sub>4</sub>S [ $M+H$ ]<sup>+</sup>

389.1781, found 389.1786.

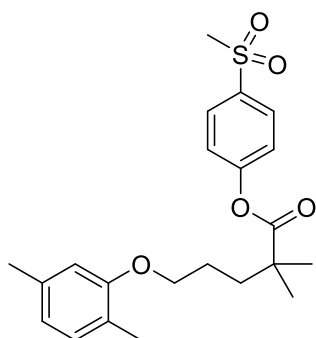

**4-(methylsulfonyl)phenyl 5-(2,5-dimethylphenoxy)-2,2-dimethylpentanoate (4f)**

29.1 mg, 36% yield, Brown oil;

$^1\text{H}$  NMR (500 MHz,  $\text{CDCl}_3$ )  $\delta$ : 7.95 (d,  $J = 8.0$  Hz, 2H), 7.23 (d,  $J = 8.5$  Hz, 2H), 7.00 (d,  $J = 7.5$  Hz, 1H), 6.67 (d,  $J = 7.5$  Hz, 1H), 6.62 (s, 1H), 3.99 (t,  $J = 5.5$  Hz, 2H), 3.05 (s, 3H), 2.30 (s, 3H), 2.16 (s, 3H), 1.92-1.84 (m, 4H), 1.39 (s, 6H);  $^{13}\text{C}$  NMR (125 MHz,  $\text{CDCl}_3$ )  $\delta$ : 175.6, 156.66, 155.06, 137.6, 136.4, 130.3, 129.0, 123.4, 122.6, 120.8, 111.8, 67.4, 44.5, 42.6, 36.9, 25.1, 25.0, 21.3, 15.7; LRMS (EI, 70eV) ( $m/z$ , %) 404 ( $\text{M}^+$ , 1), 283 (30), 122 (11), 83 (100); HRMS  $m/z$  (ESI) for calcd  $\text{C}_{22}\text{H}_{28}\text{O}_5\text{S}$   $[\text{M}+\text{H}]^+$  405.1730, found 405.1728.

## (D) Spectra

### (methylsulfinyl)benzene (2a)

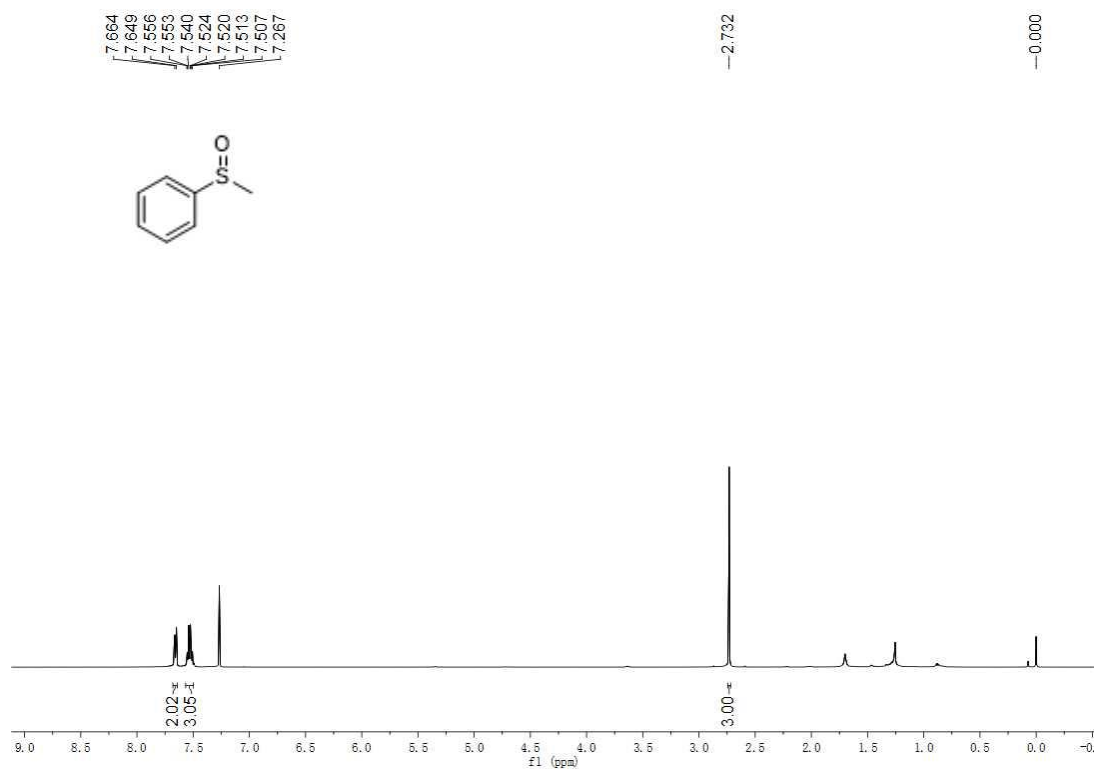

<sup>1</sup>H NMR (500 MHz, CDCl<sub>3</sub>)

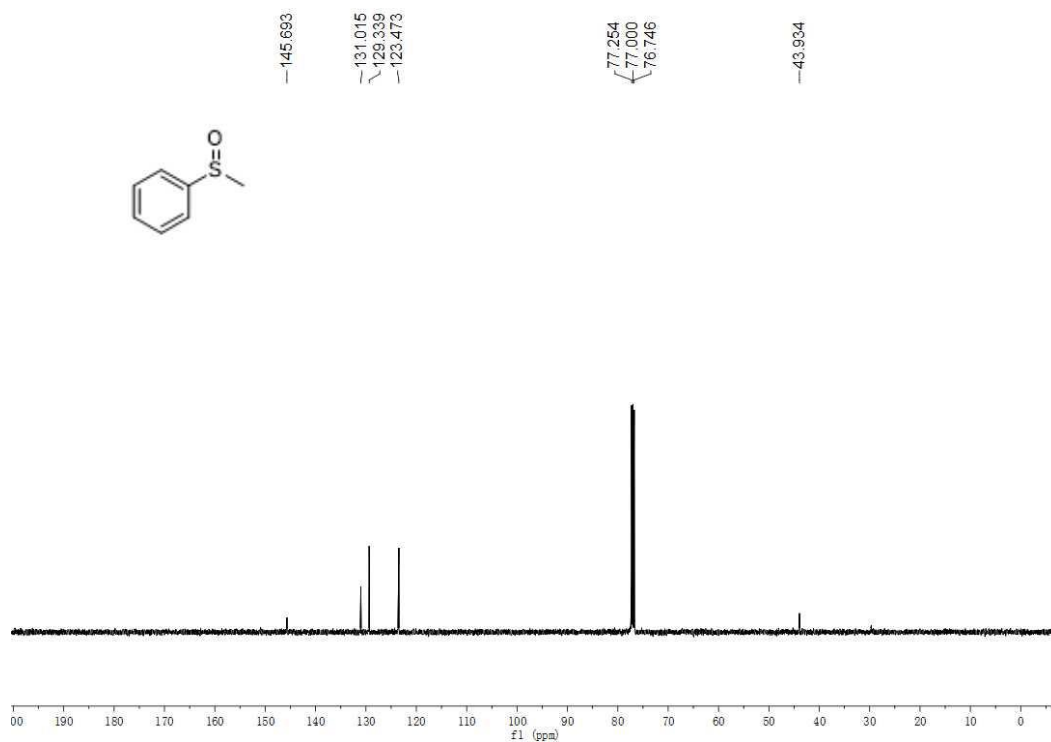

<sup>13</sup>C NMR (125 MHz, CDCl<sub>3</sub>)

(methylsulfonyl)benzene (3a)

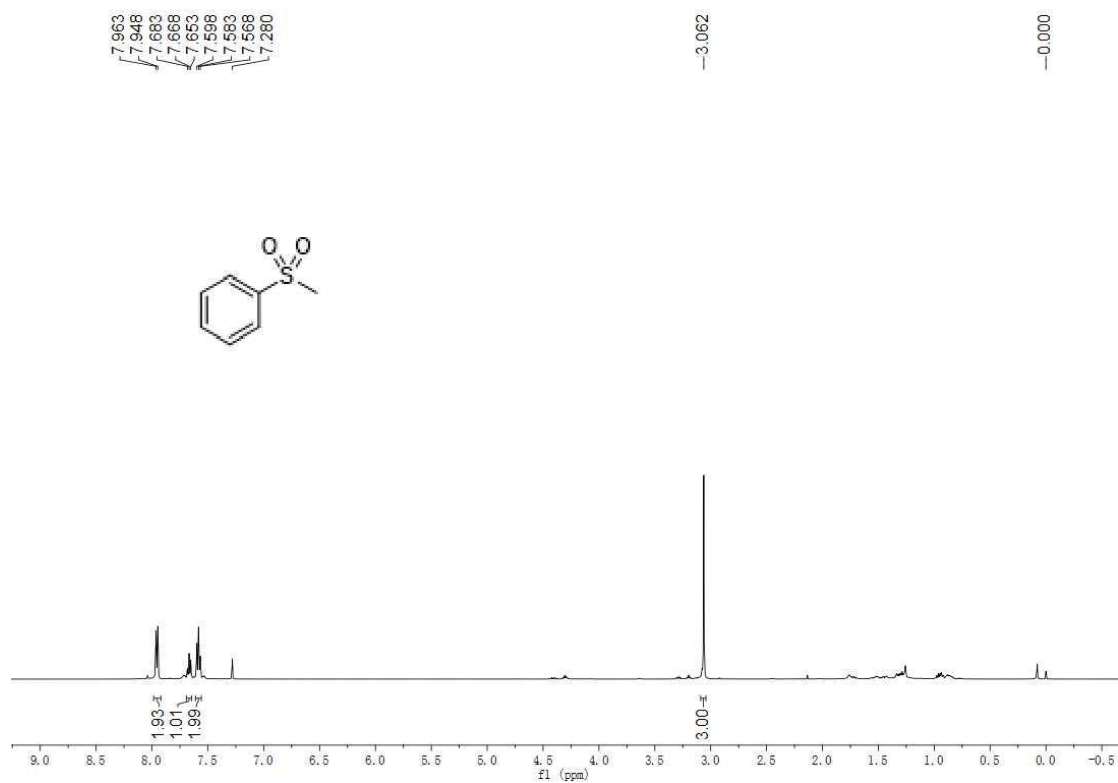

<sup>1</sup>H NMR (500 MHz, CDCl<sub>3</sub>)

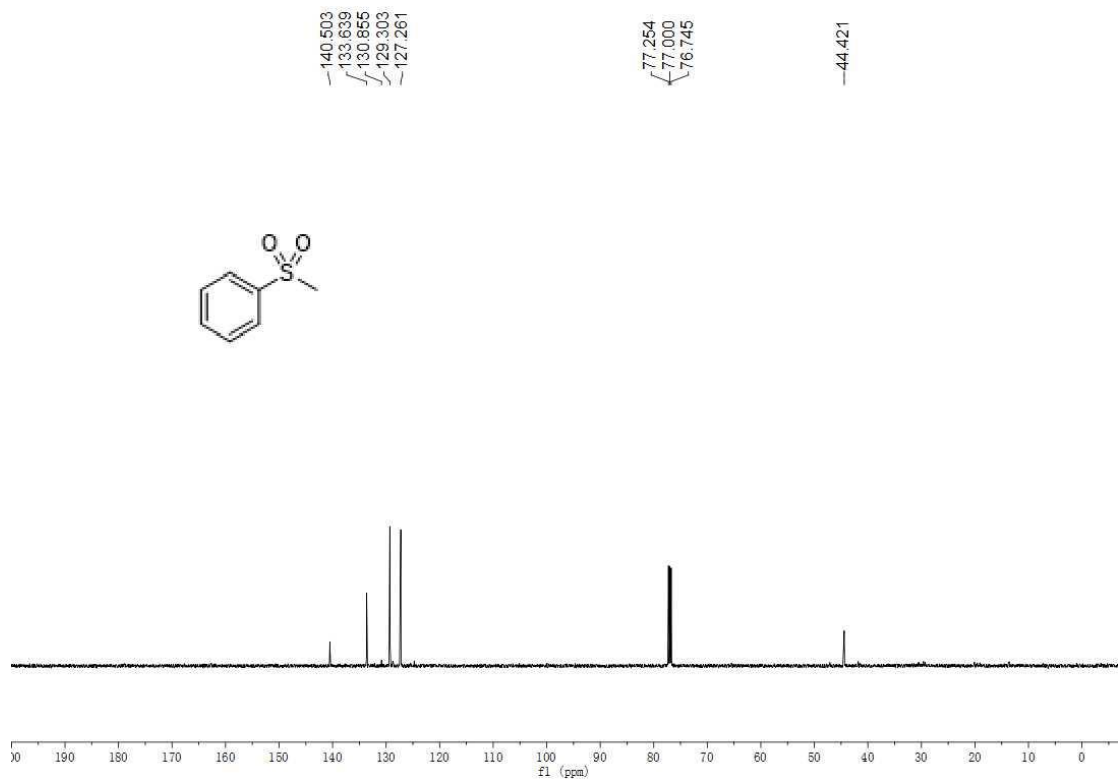

<sup>13</sup>C NMR (125 MHz, CDCl<sub>3</sub>)



### 1-methyl-4-(methylsulfinyl)benzene (2b)

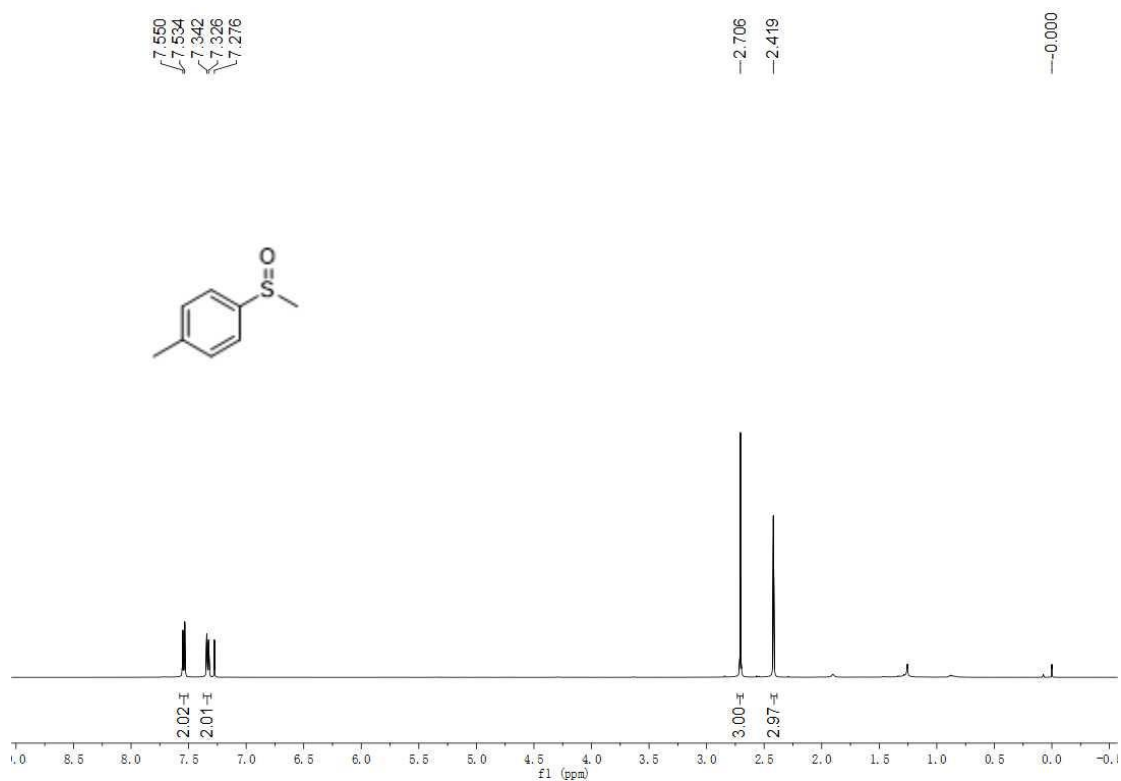

### <sup>1</sup>H NMR (500 MHz, CDCl<sub>3</sub>)

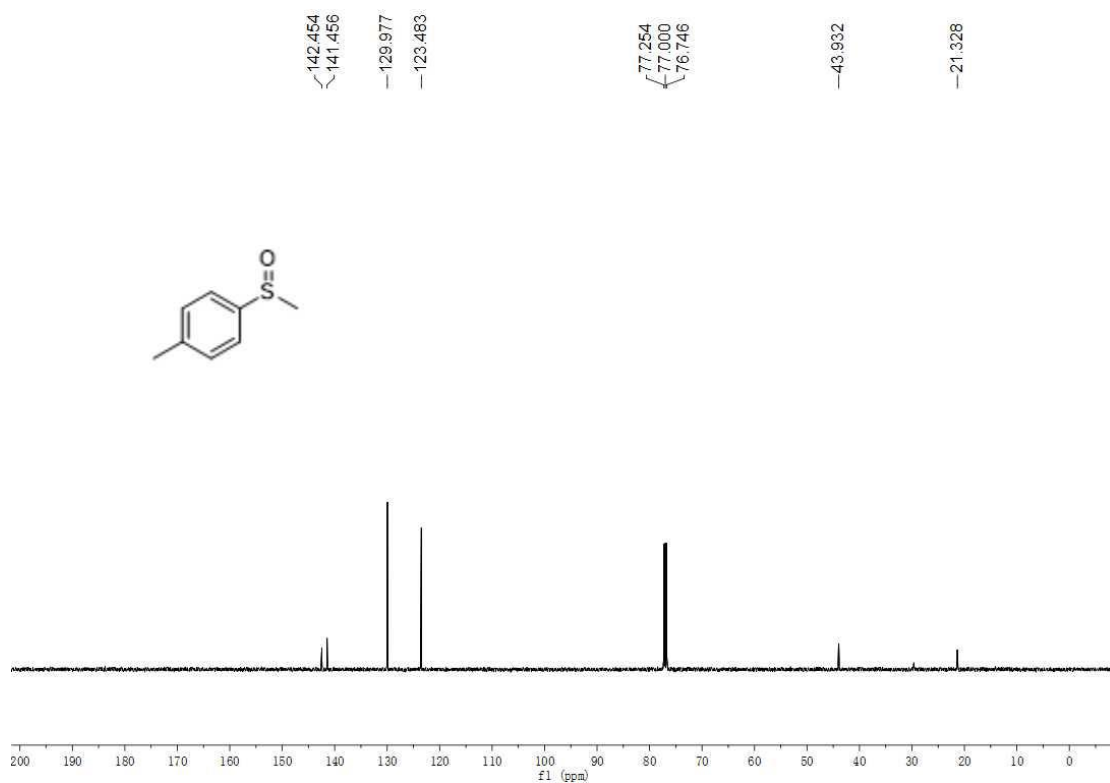

### <sup>13</sup>C NMR (125 MHz, CDCl<sub>3</sub>)

### 1-methyl-4-(methylsulfonyl)benzene (3b)

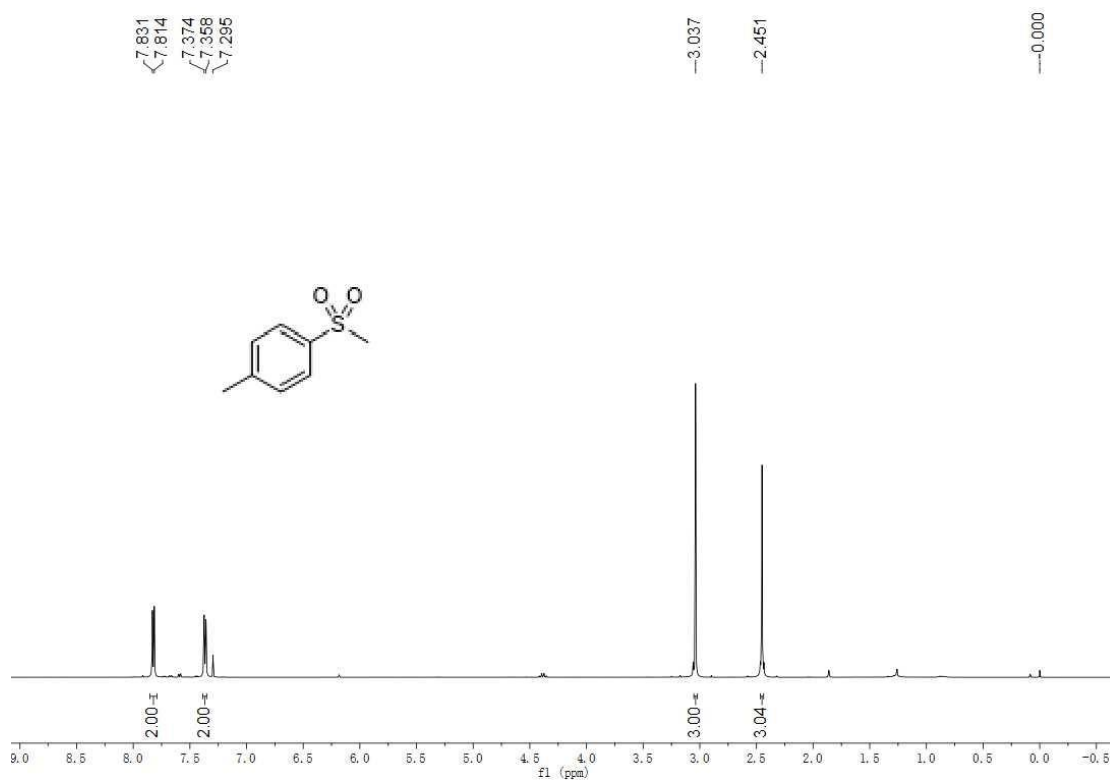

<sup>1</sup>H NMR (500 MHz, CDCl<sub>3</sub>)

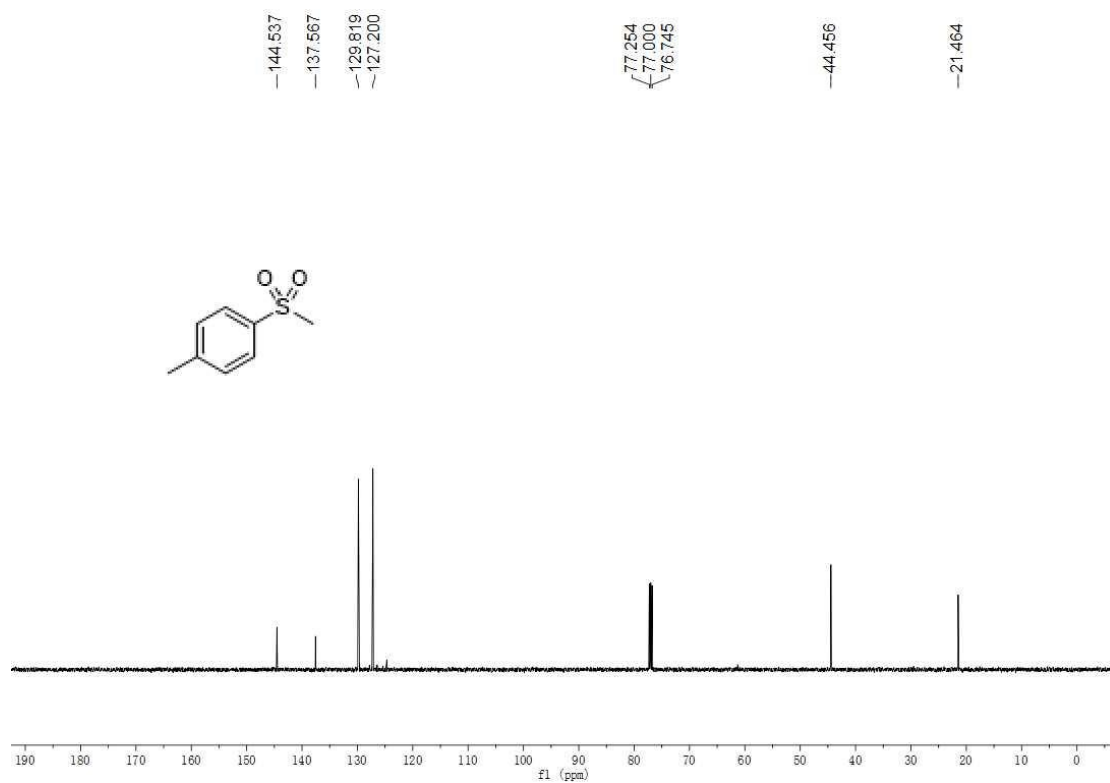

<sup>13</sup>C NMR (125 MHz, CDCl<sub>3</sub>)

### 1-methoxy-4-(methylsulfinyl)benzene (2c)

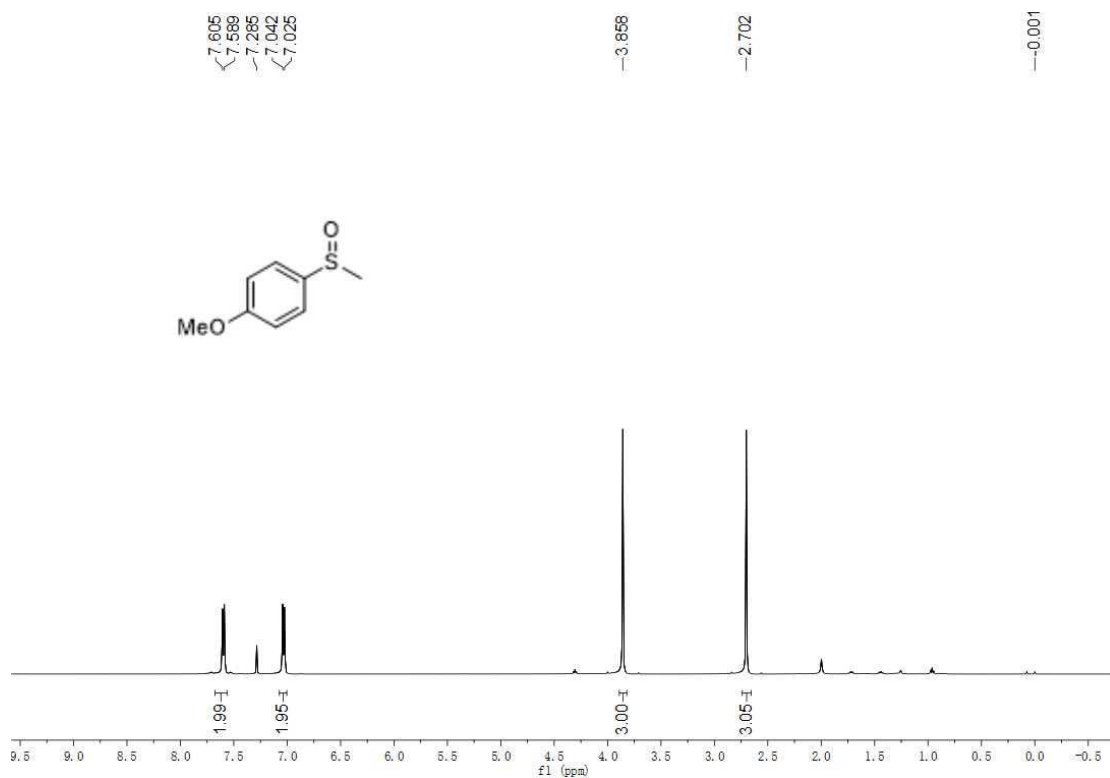

### <sup>1</sup>H NMR (500 MHz, CDCl<sub>3</sub>)

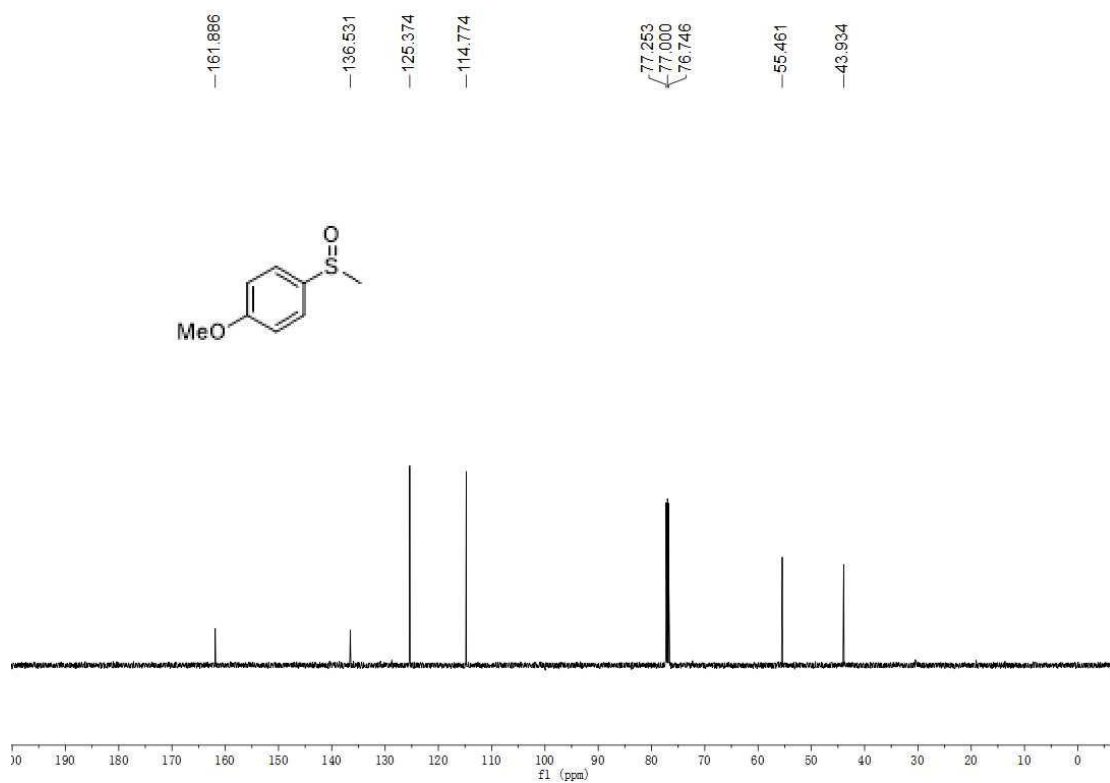

### <sup>13</sup>C NMR (125 MHz, CDCl<sub>3</sub>)

### 1-methoxy-4-(methylsulfonyl)benzene (3c)

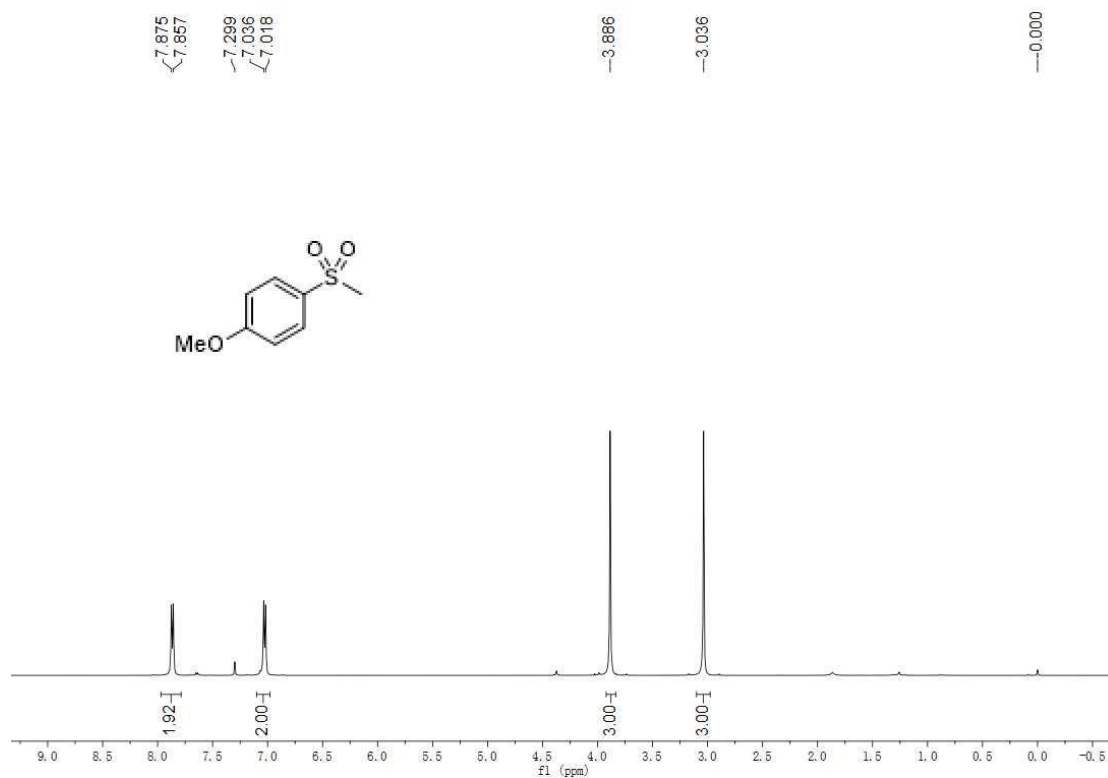

### <sup>1</sup>H NMR (500 MHz, CDCl<sub>3</sub>)

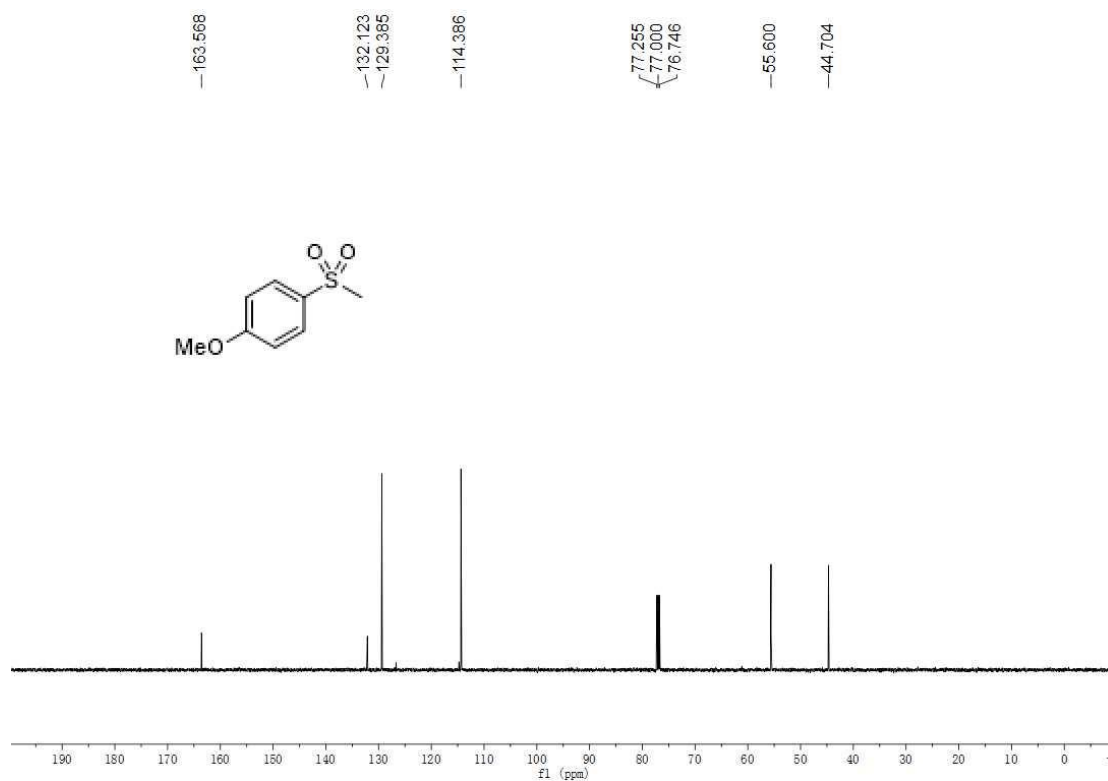

### <sup>13</sup>C NMR (125 MHz, CDCl<sub>3</sub>)

### 1-(methylsulfinyl)-4-nitrobenzene (2d)

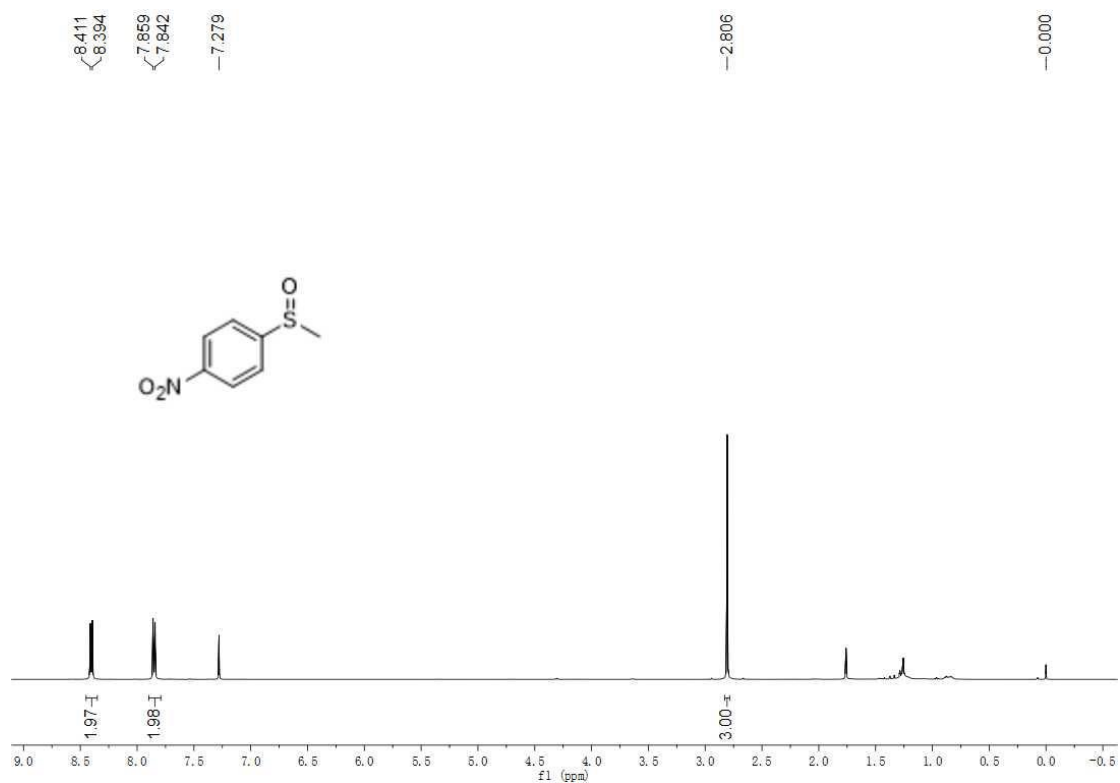

<sup>1</sup>H NMR (500 MHz, CDCl<sub>3</sub>)

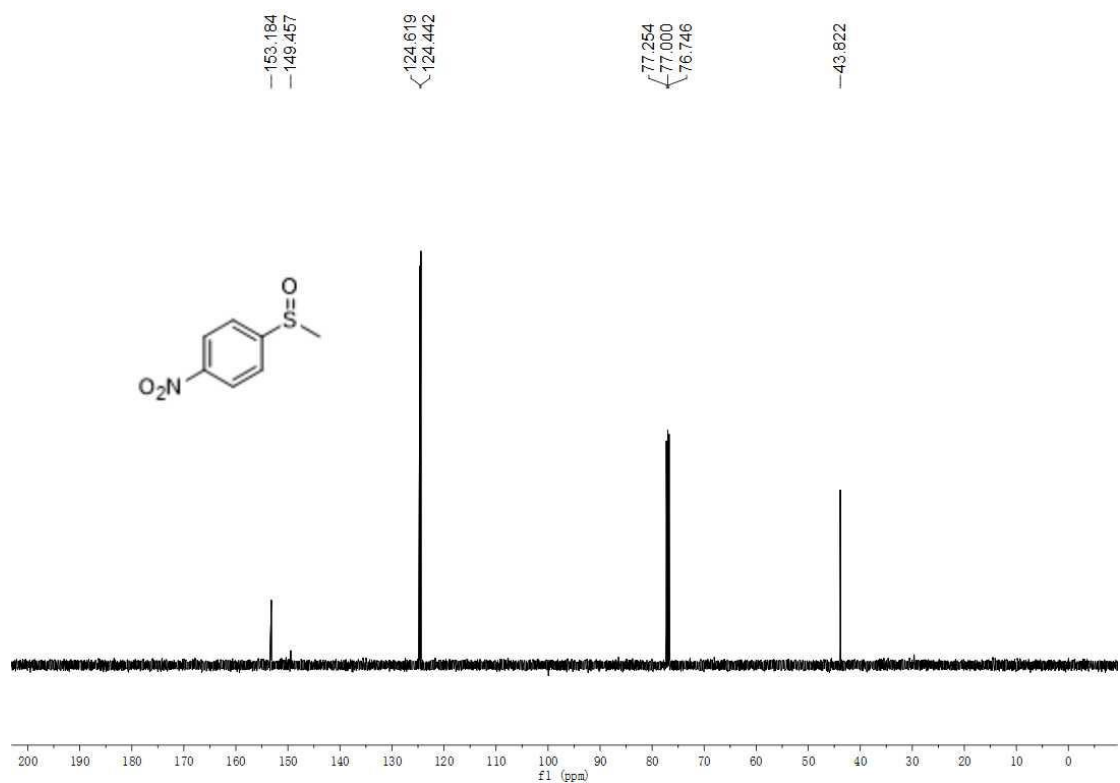

<sup>13</sup>C NMR (125 MHz, CDCl<sub>3</sub>)

### 1-(methylsulfonyl)-4-nitrobenzene (3d)

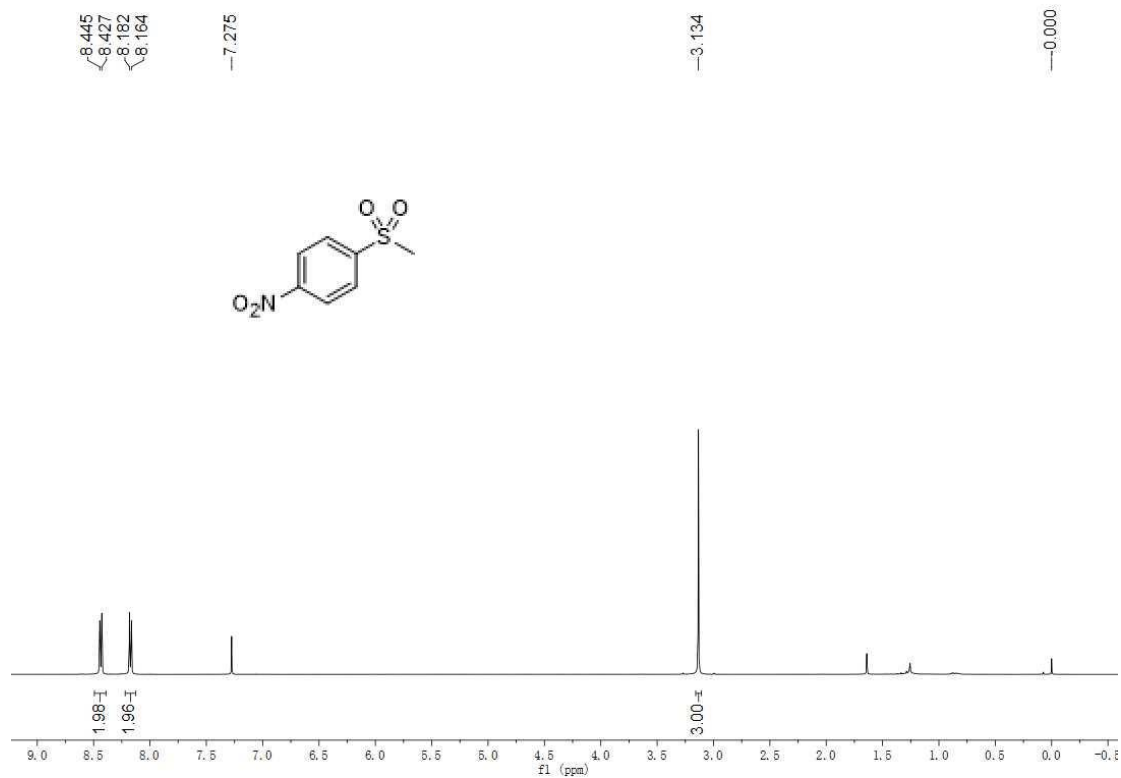

<sup>1</sup>H NMR (500 MHz, CDCl<sub>3</sub>)

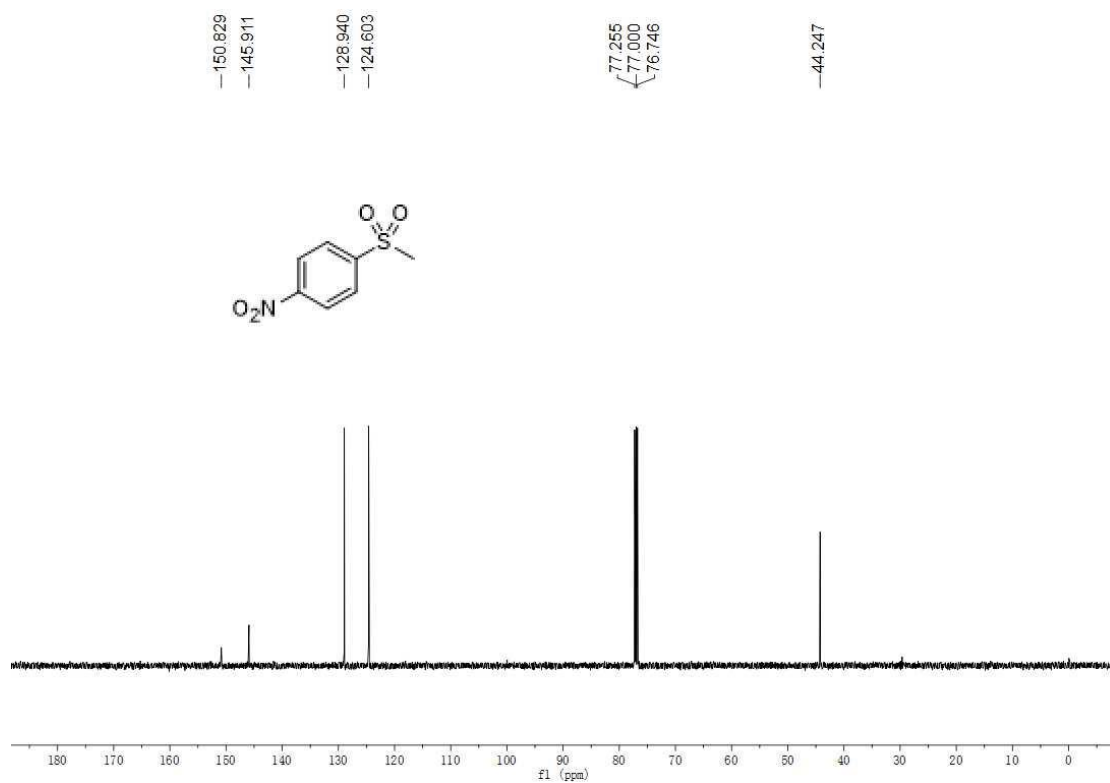

<sup>13</sup>C NMR (125 MHz, CDCl<sub>3</sub>)

# 1-(methylsulfonyl)-4-nitrobenzen (2e)

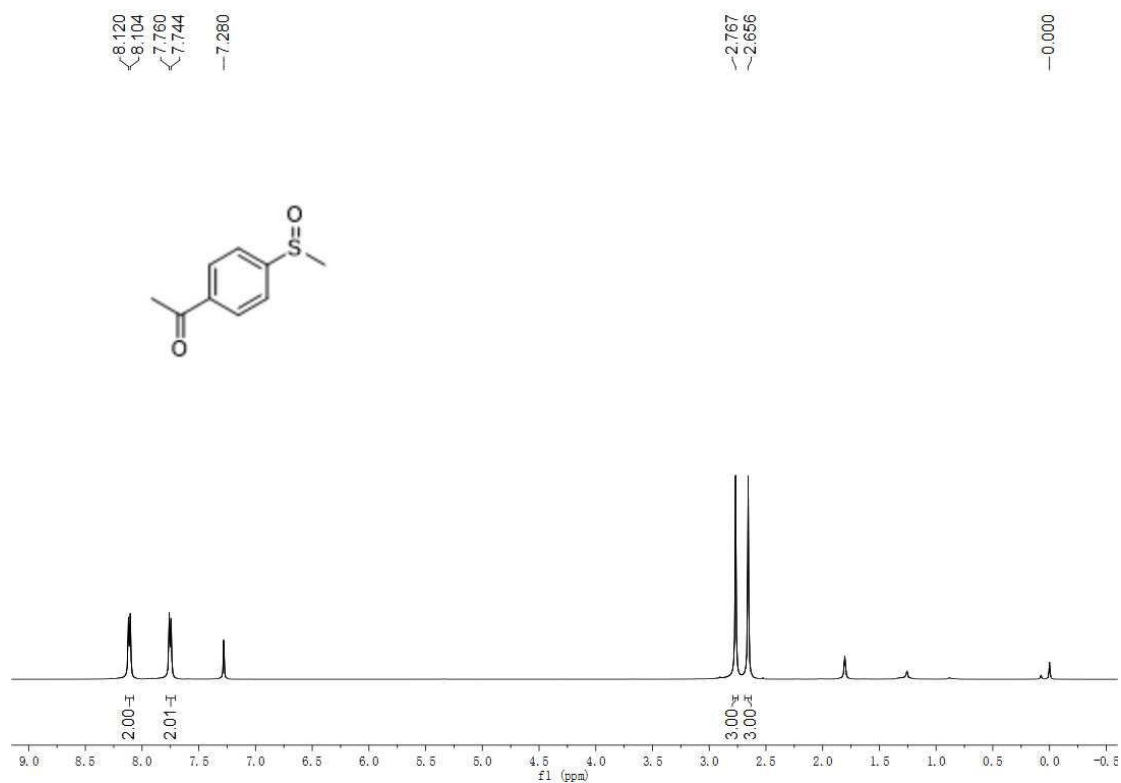

<sup>1</sup>H NMR (500 MHz, CDCl<sub>3</sub>)

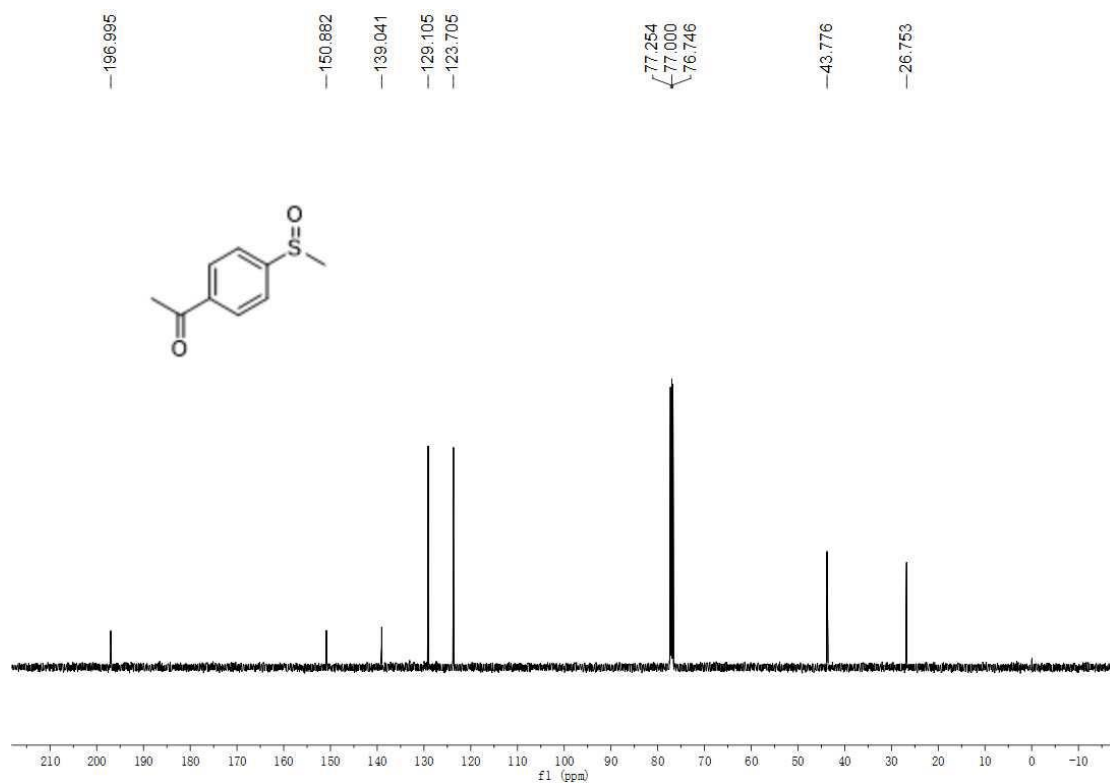

<sup>13</sup>C NMR (125 MHz, CDCl<sub>3</sub>)

### 1-(4-(methylsulfonyl)phenyl)ethan-1-one (3e)

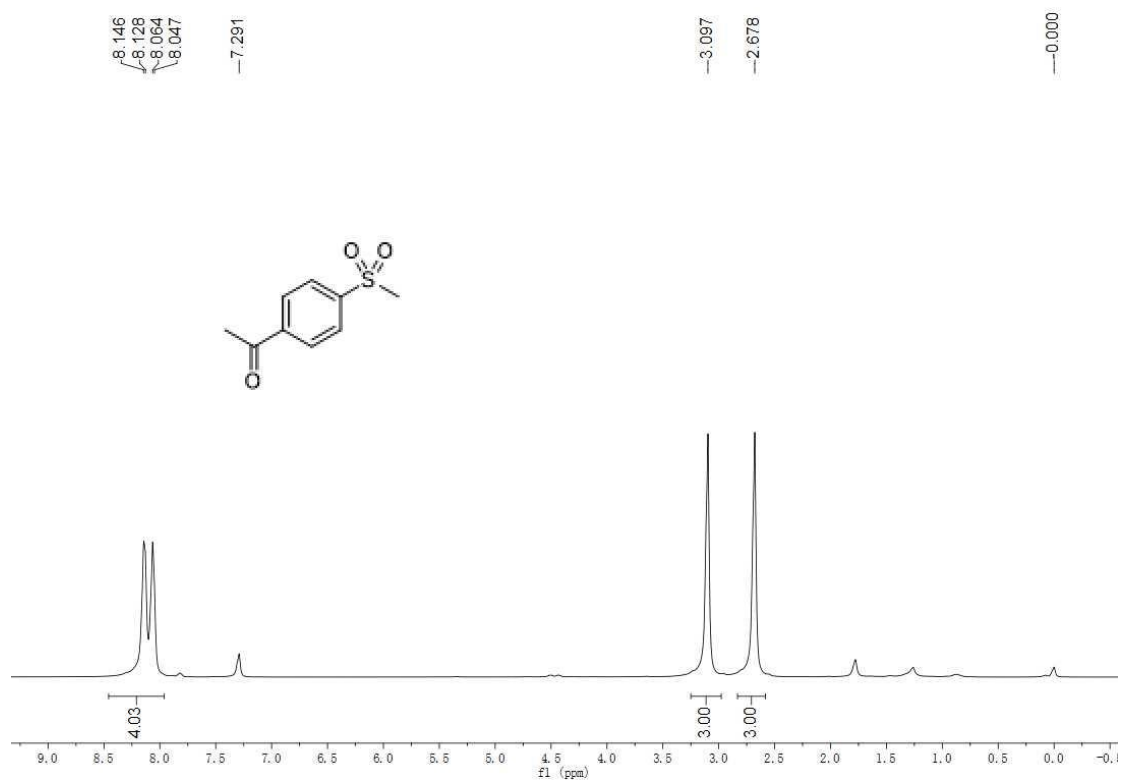

### <sup>1</sup>H NMR (500 MHz, CDCl<sub>3</sub>)

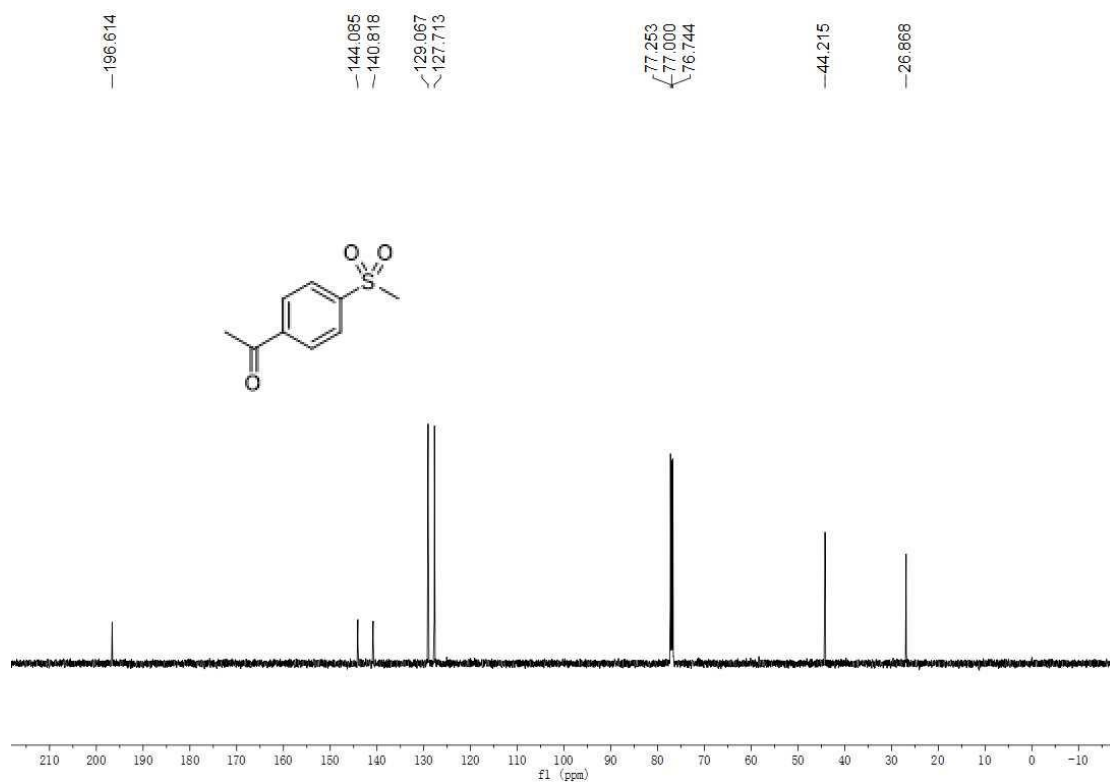

### <sup>13</sup>C NMR (125 MHz, CDCl<sub>3</sub>)



### 1-chloro-4-(methylsulfinyl)benzene (2f)

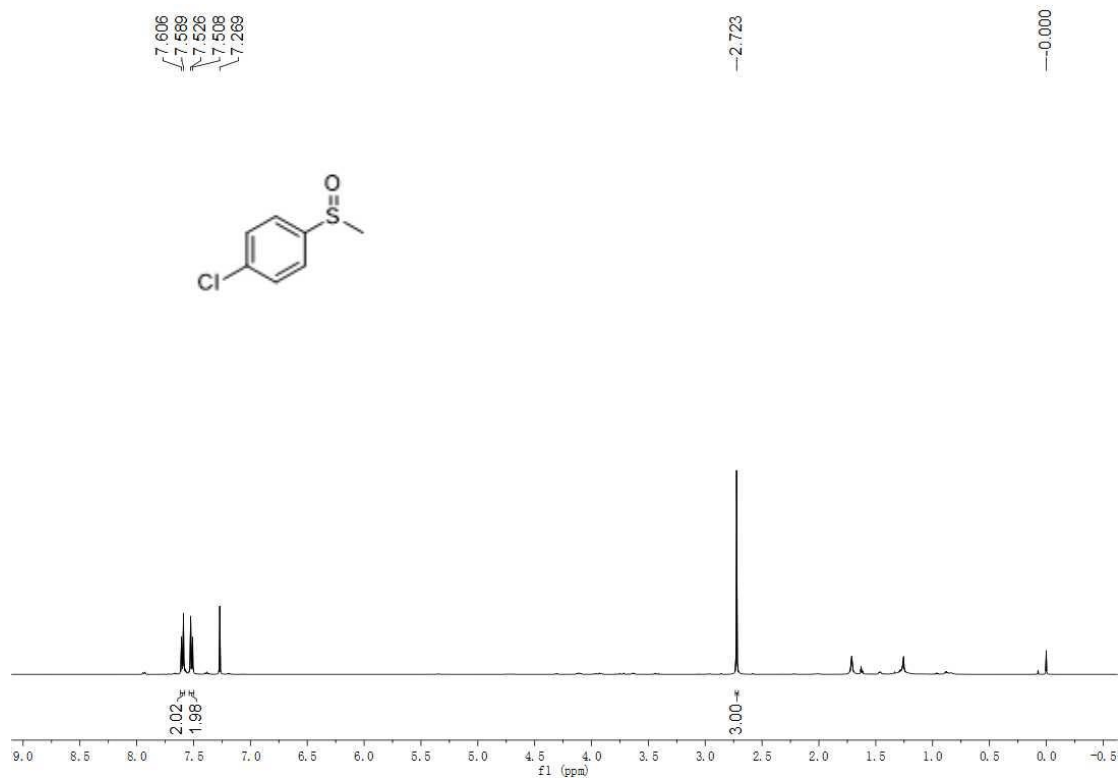

<sup>1</sup>H NMR (500 MHz, CDCl<sub>3</sub>)

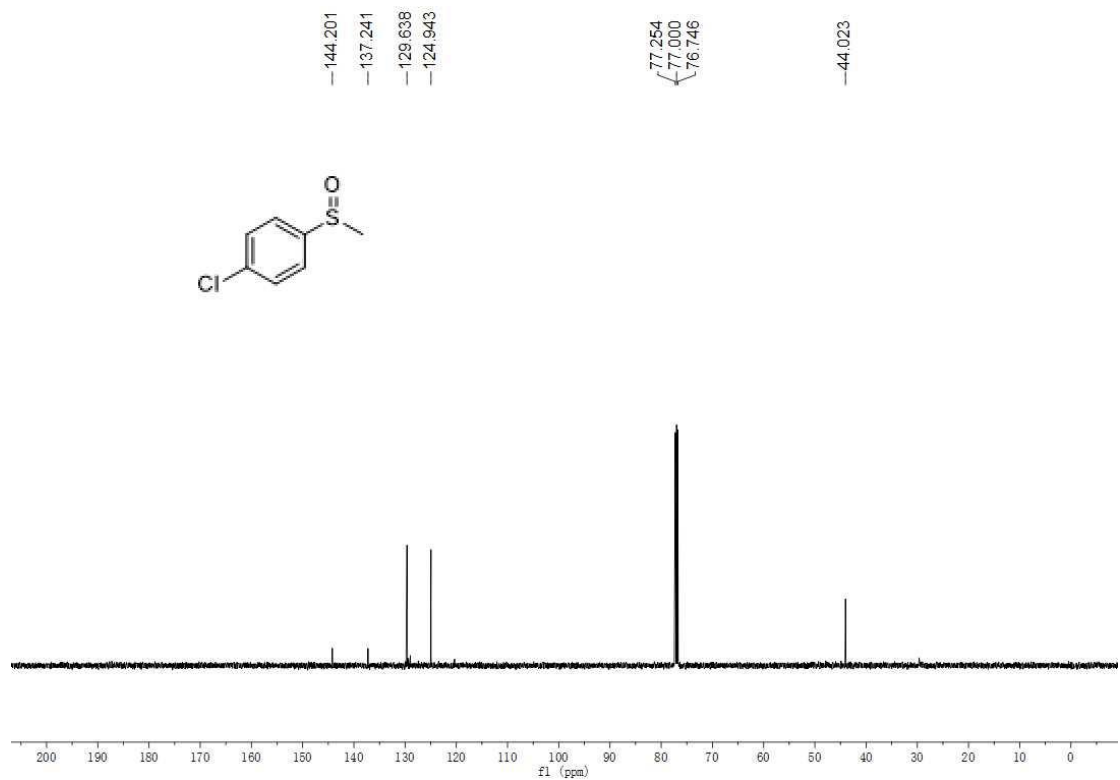

<sup>13</sup>C NMR (125 MHz, CDCl<sub>3</sub>)

### 1-chloro-4-(methylsulfonyl)benzene (3f)

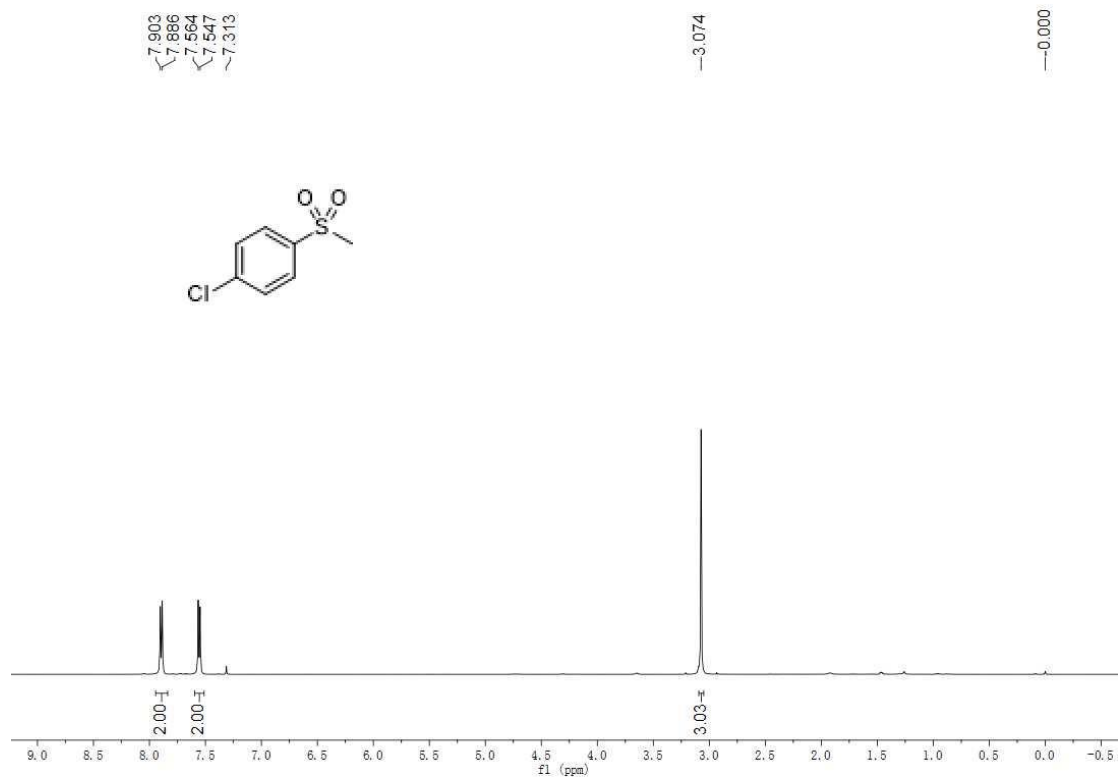

<sup>1</sup>H NMR (500 MHz, CDCl<sub>3</sub>)

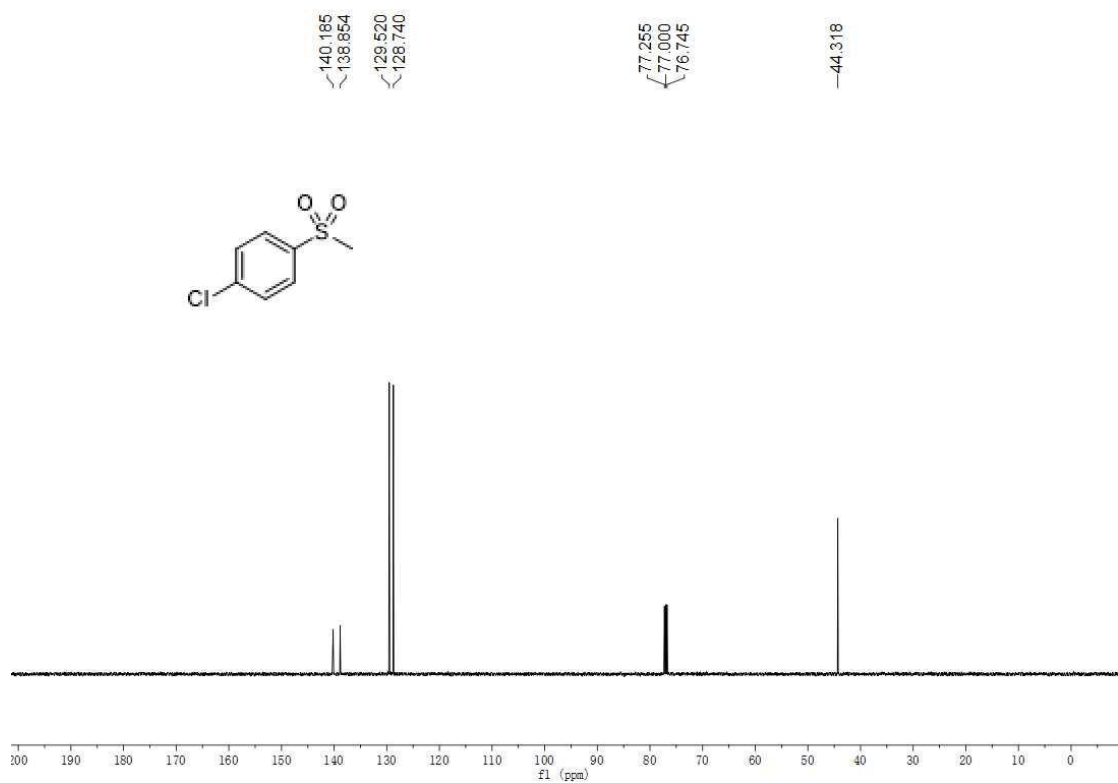

<sup>13</sup>C NMR (125 MHz, CDCl<sub>3</sub>)

# 1-chloro-3-(methylsulfinyl)benzene (2g)

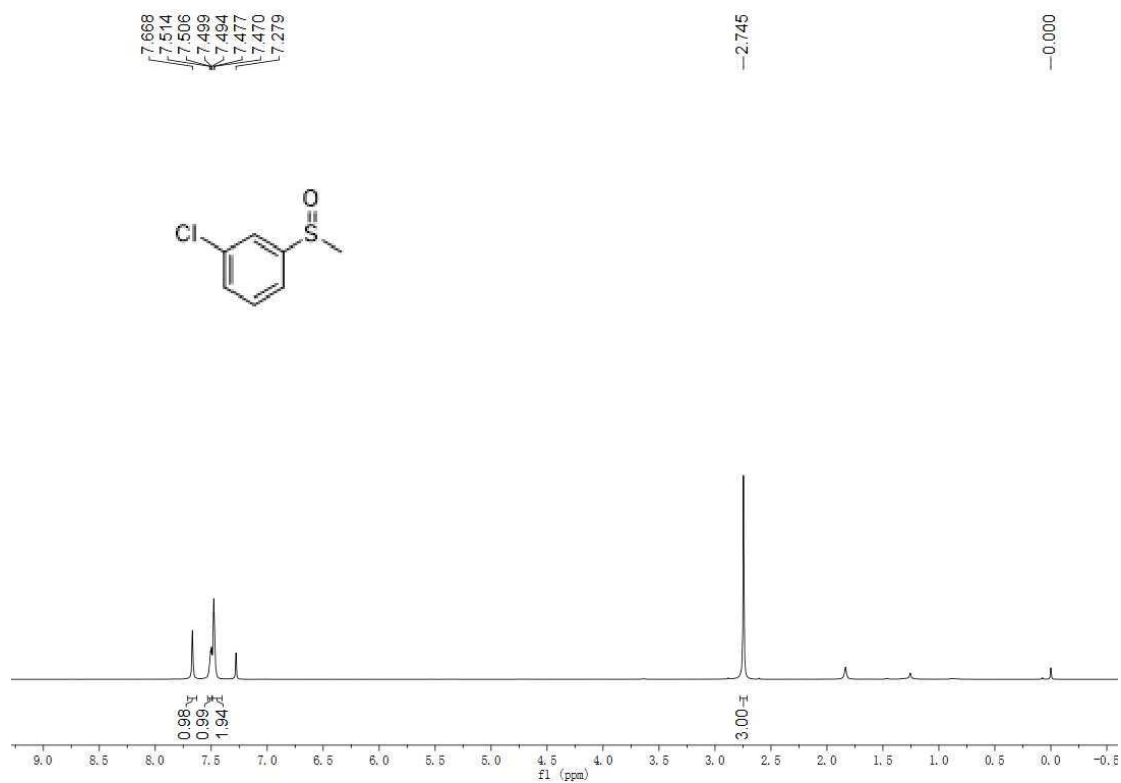

## <sup>1</sup>H NMR (500 MHz, CDCl<sub>3</sub>)

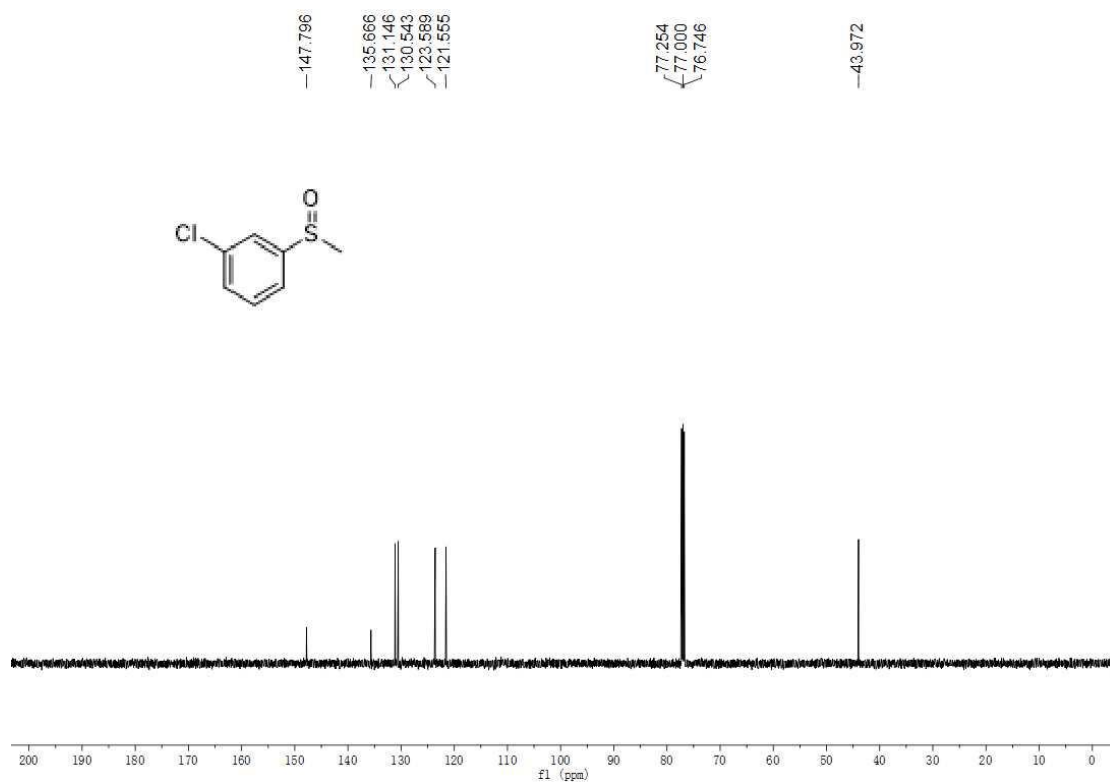

## <sup>13</sup>C NMR (125 MHz, CDCl<sub>3</sub>)

### 1-chloro-3-(methylsulfonyl)benzene (3g)

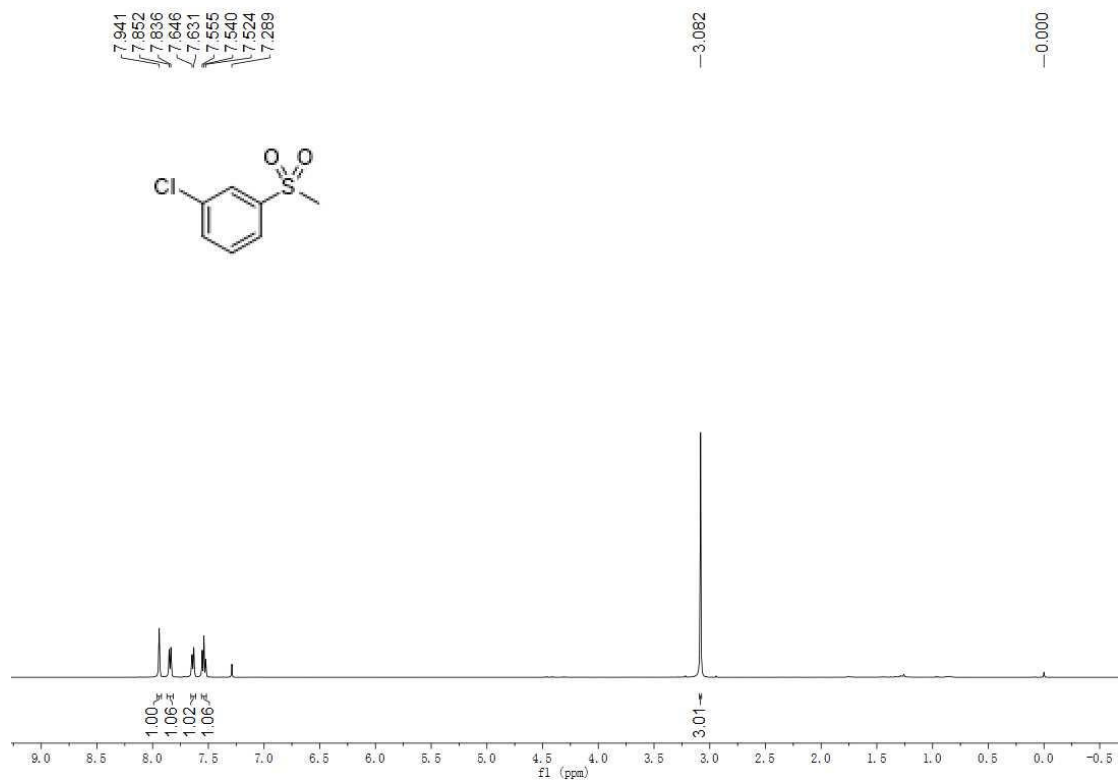

<sup>1</sup>H NMR (500 MHz, CDCl<sub>3</sub>)

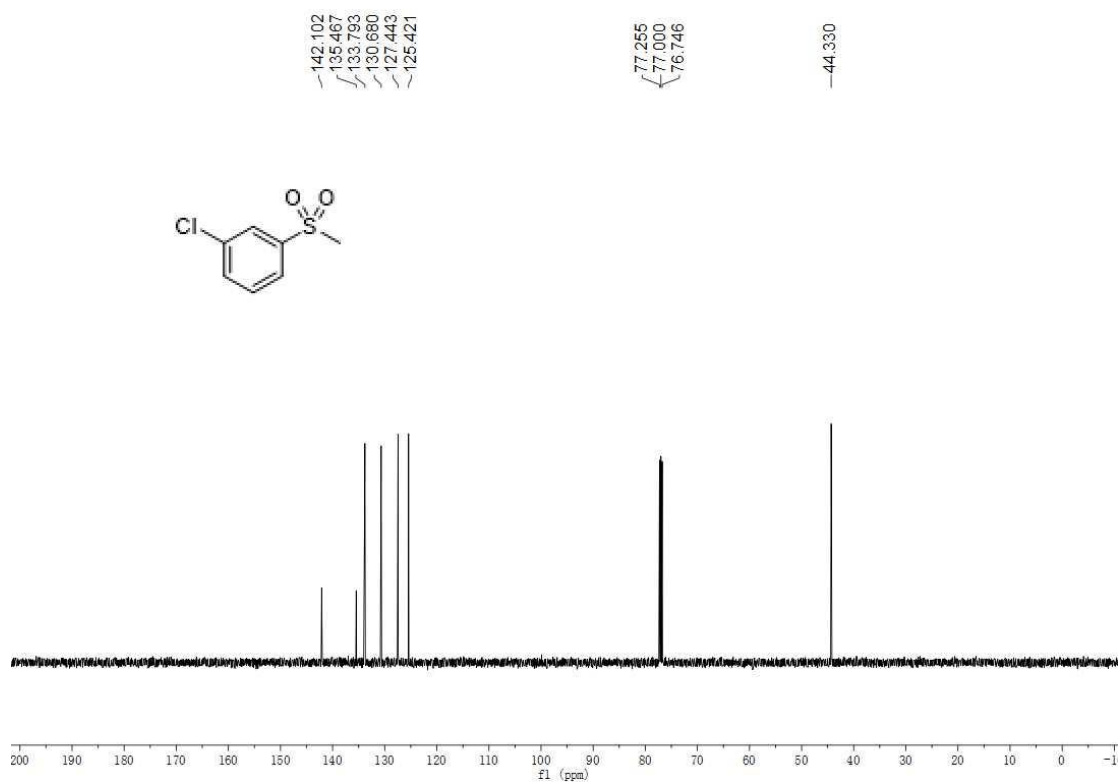

<sup>13</sup>C NMR (125 MHz, CDCl<sub>3</sub>)

### 1-bromo-2-(methylsulfinyl)benzene (2h)

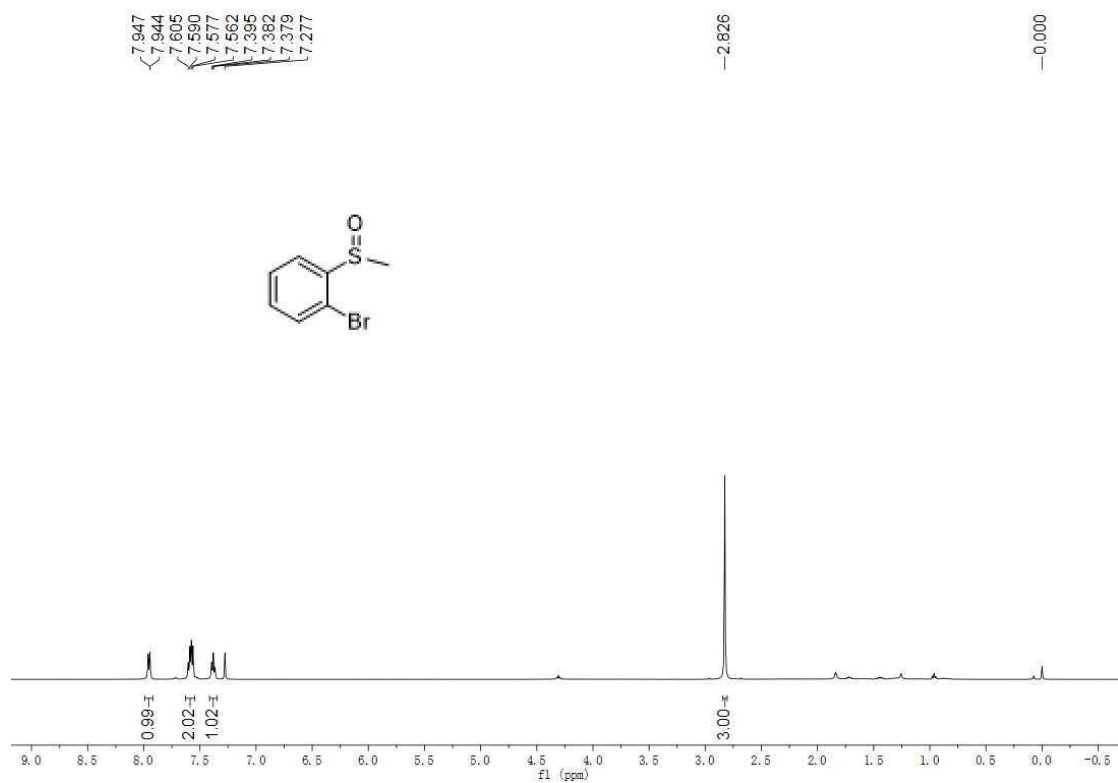

<sup>1</sup>H NMR (500 MHz, CDCl<sub>3</sub>)

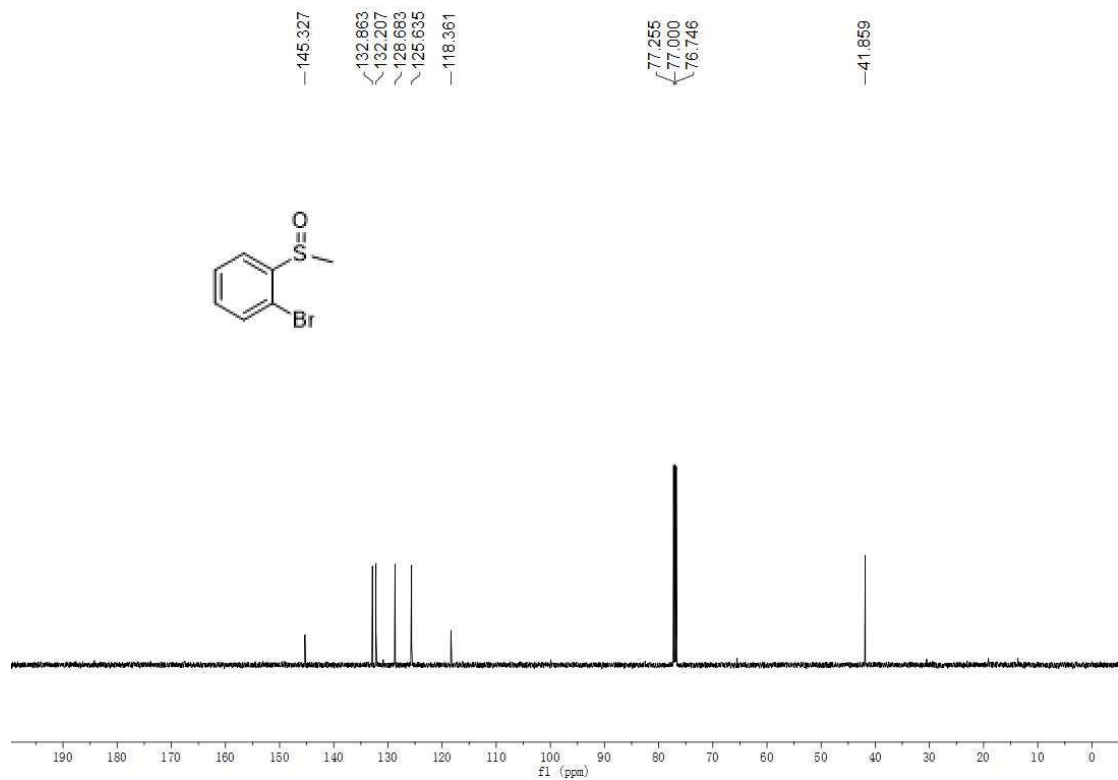

<sup>13</sup>C NMR (125 MHz, CDCl<sub>3</sub>)

### 1-bromo-2-(methylsulfonyl)benzene (3h)

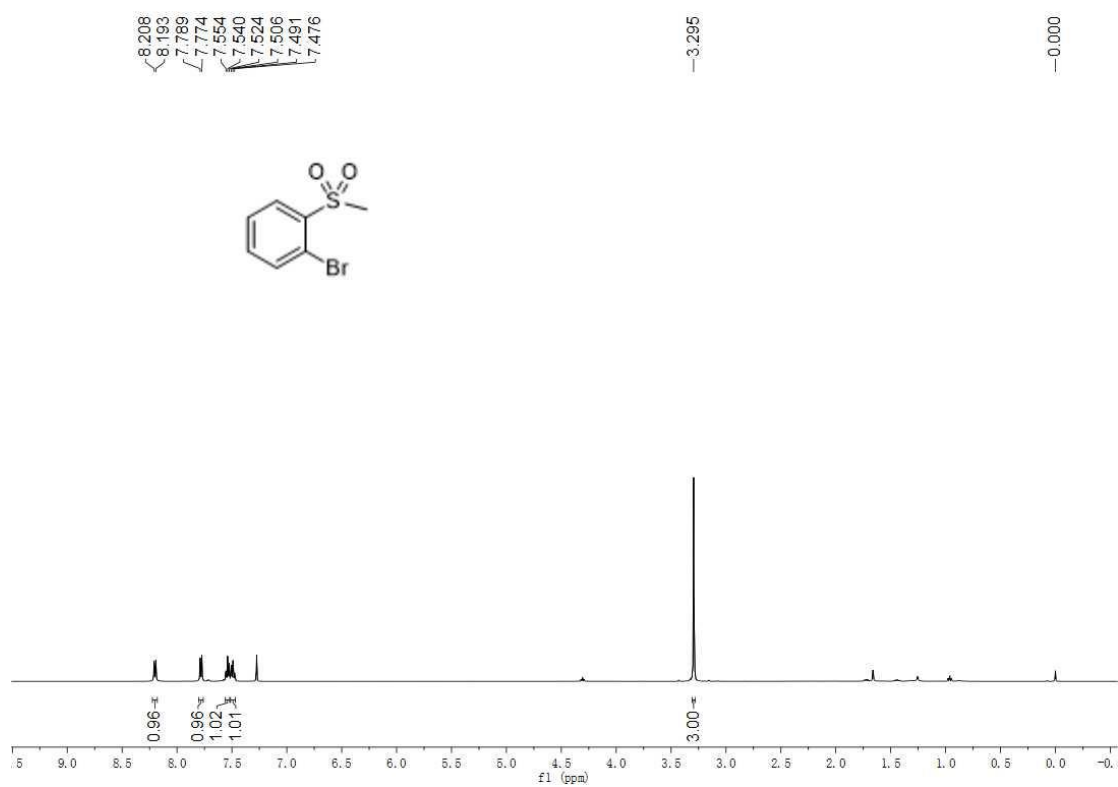

<sup>1</sup>H NMR (500 MHz, CDCl<sub>3</sub>)

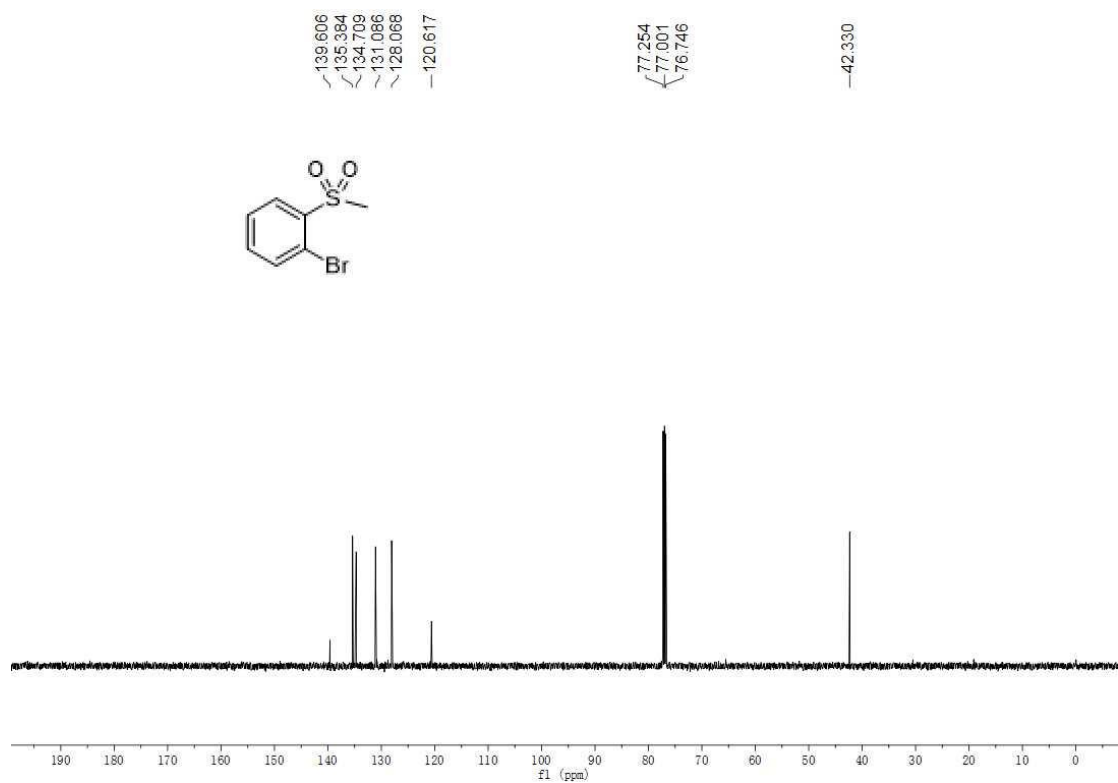

<sup>13</sup>C NMR (125 MHz, CDCl<sub>3</sub>)

# 1-bromo-4-(methylsulfinyl)benzene (2i)

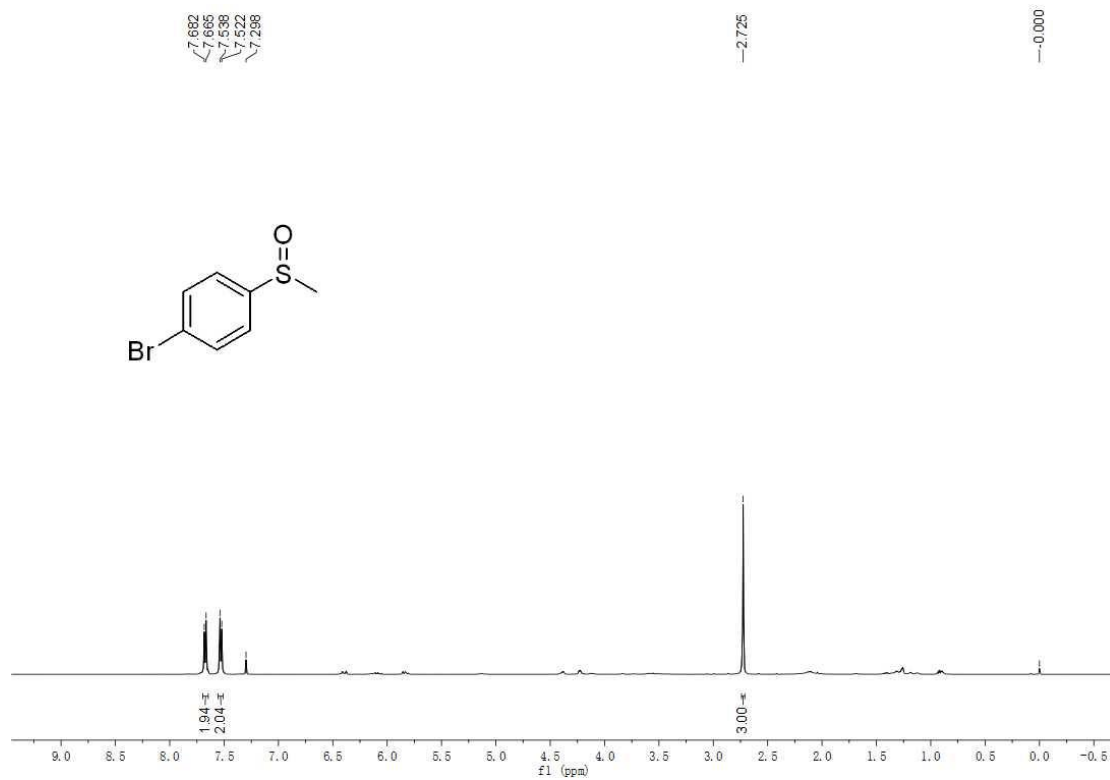

<sup>1</sup>H NMR (500 MHz, CDCl<sub>3</sub>)

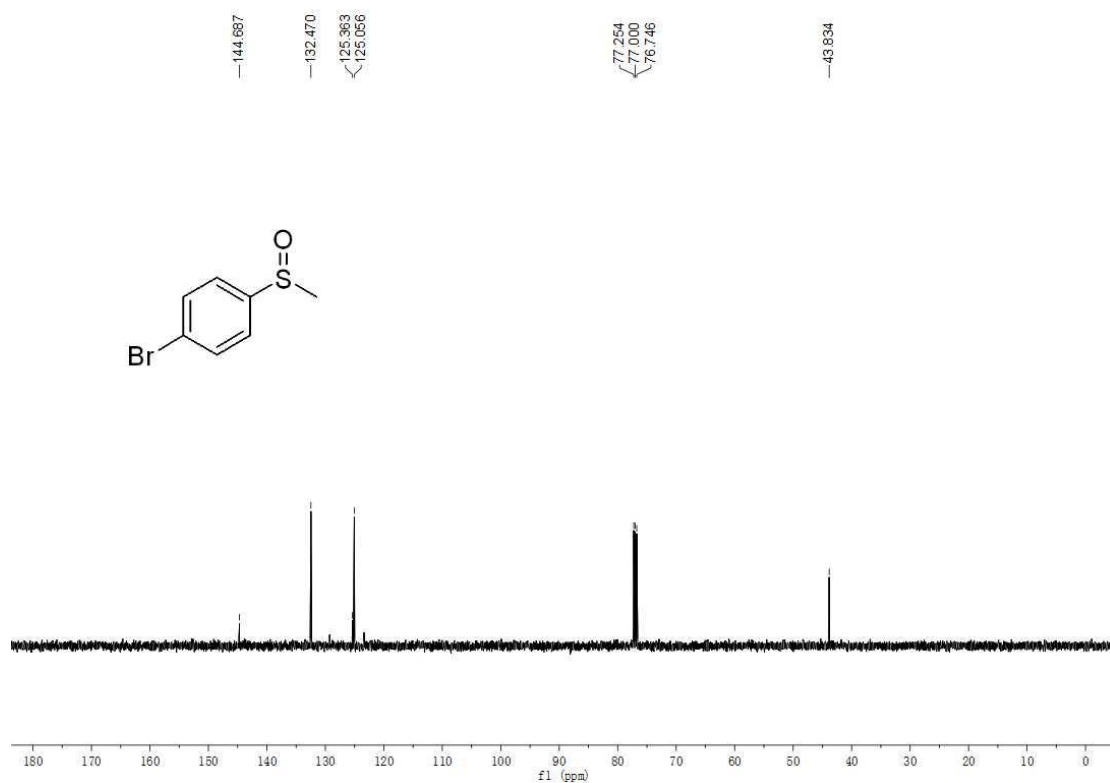

<sup>13</sup>C NMR (125 MHz, CDCl<sub>3</sub>)

### 1-bromo-4-(methylsulfonyl)benzene (3i)

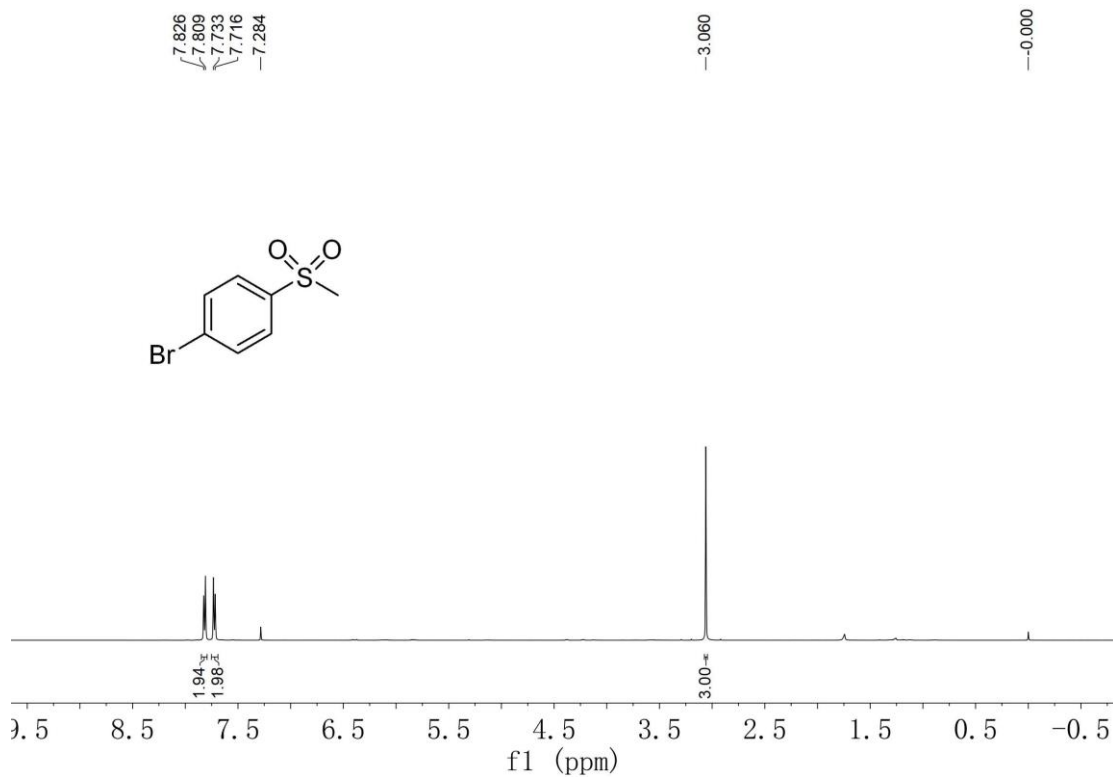

<sup>1</sup>H NMR (500 MHz, CDCl<sub>3</sub>)

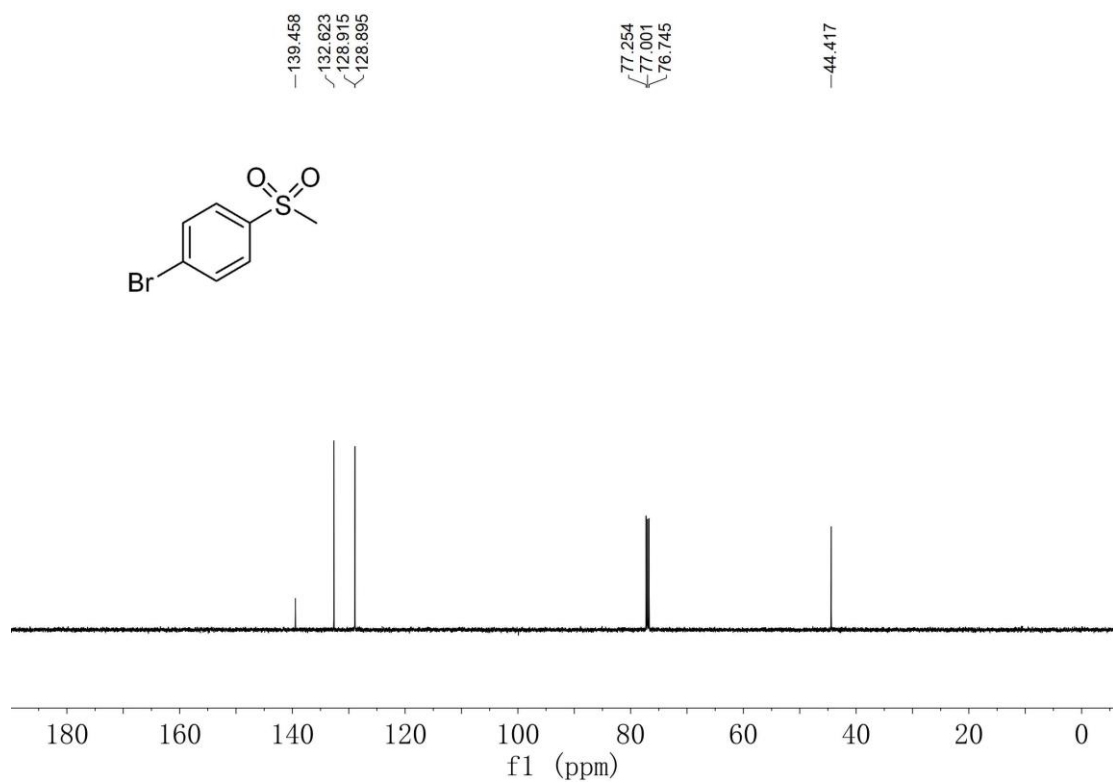

<sup>13</sup>C NMR (125 MHz, CDCl<sub>3</sub>)



## 2-(methylsulfinyl)naphthalene (2j)

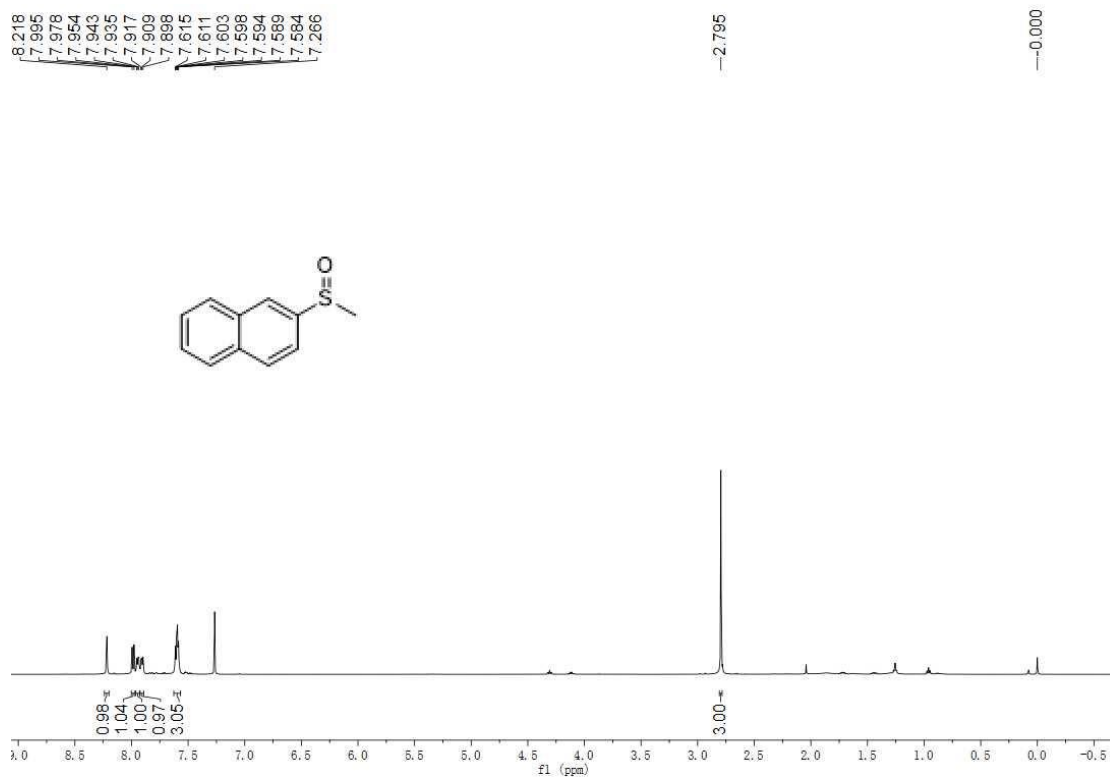

<sup>1</sup>H NMR (500 MHz, CDCl<sub>3</sub>)

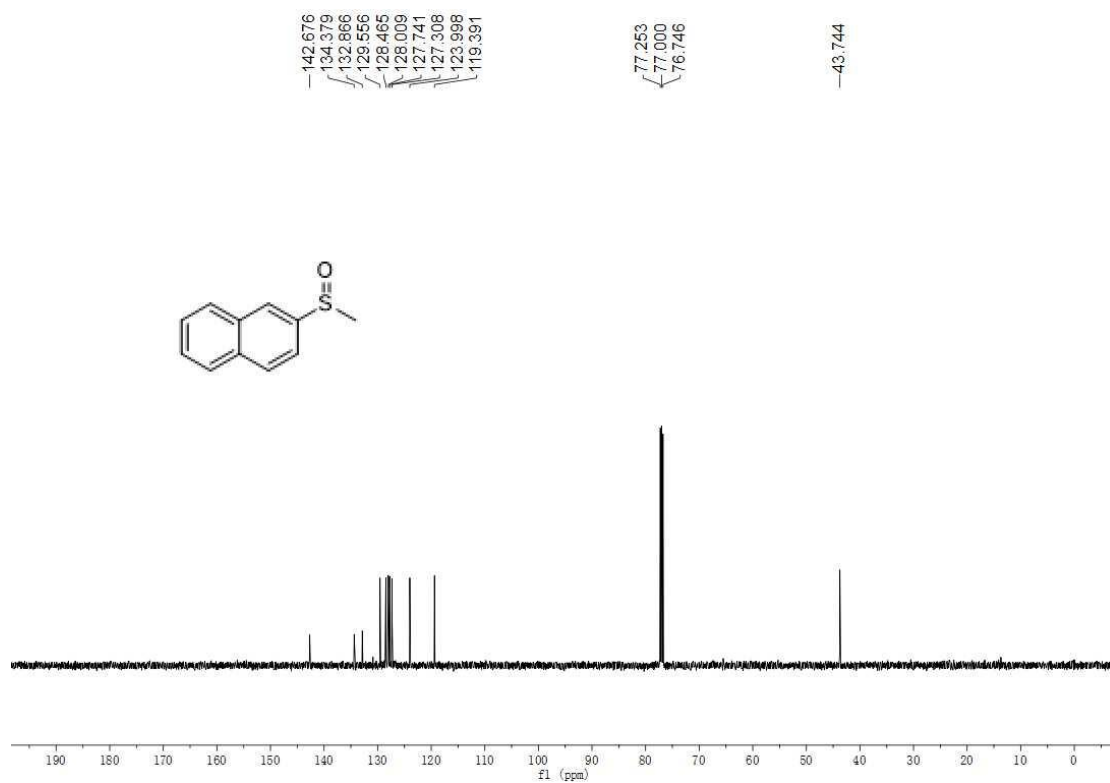

<sup>13</sup>C NMR (125 MHz, CDCl<sub>3</sub>)

## 2-(methylsulfonyl)naphthalene (3j)

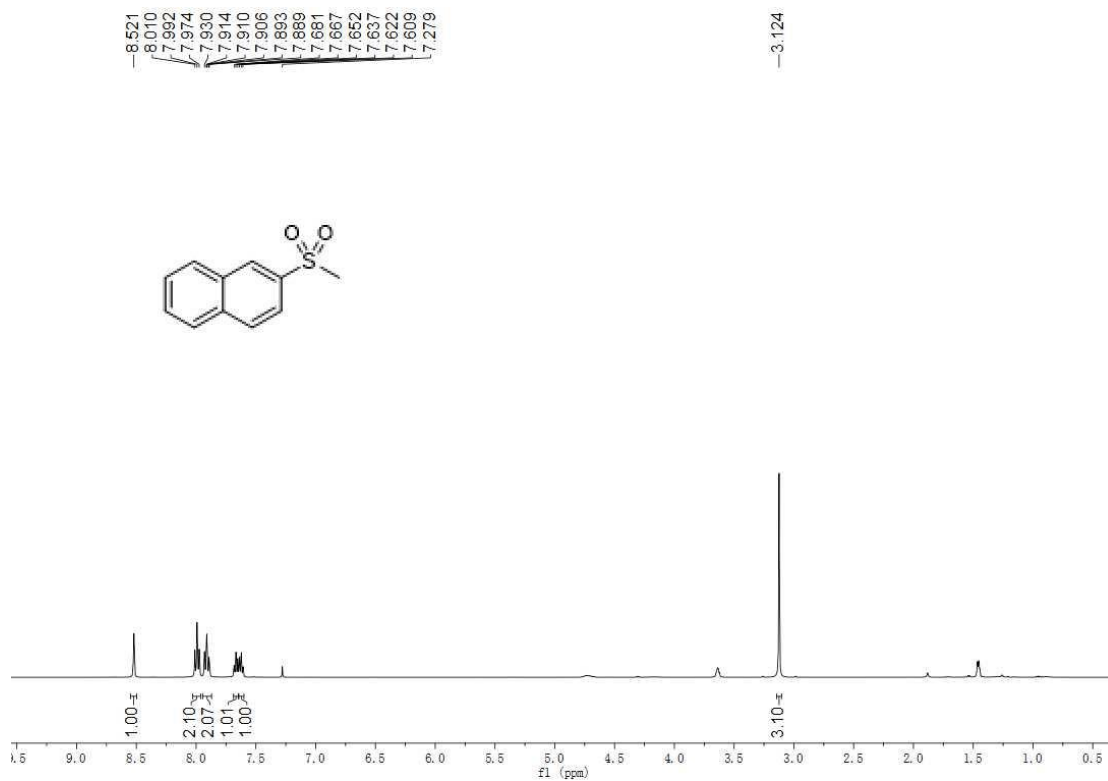

<sup>1</sup>H NMR (500 MHz, CDCl<sub>3</sub>)

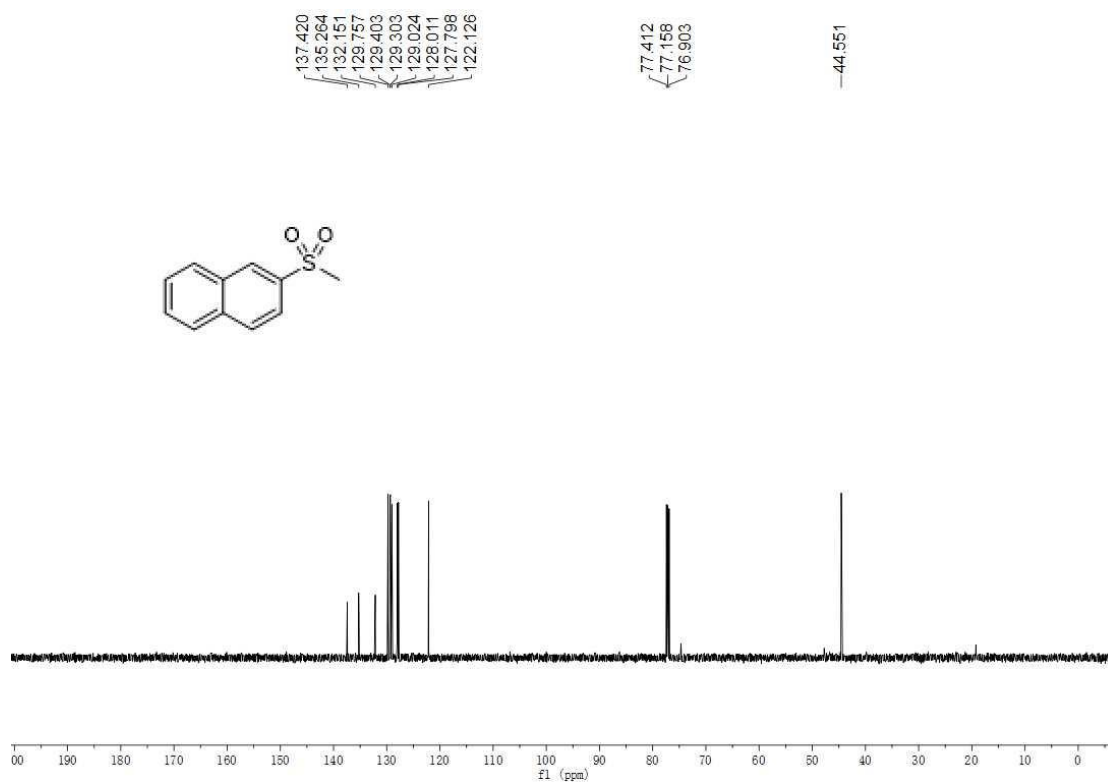

<sup>13</sup>C NMR (125 MHz, CDCl<sub>3</sub>)

## 2-(methylsulfinyl)pyridine (2k)

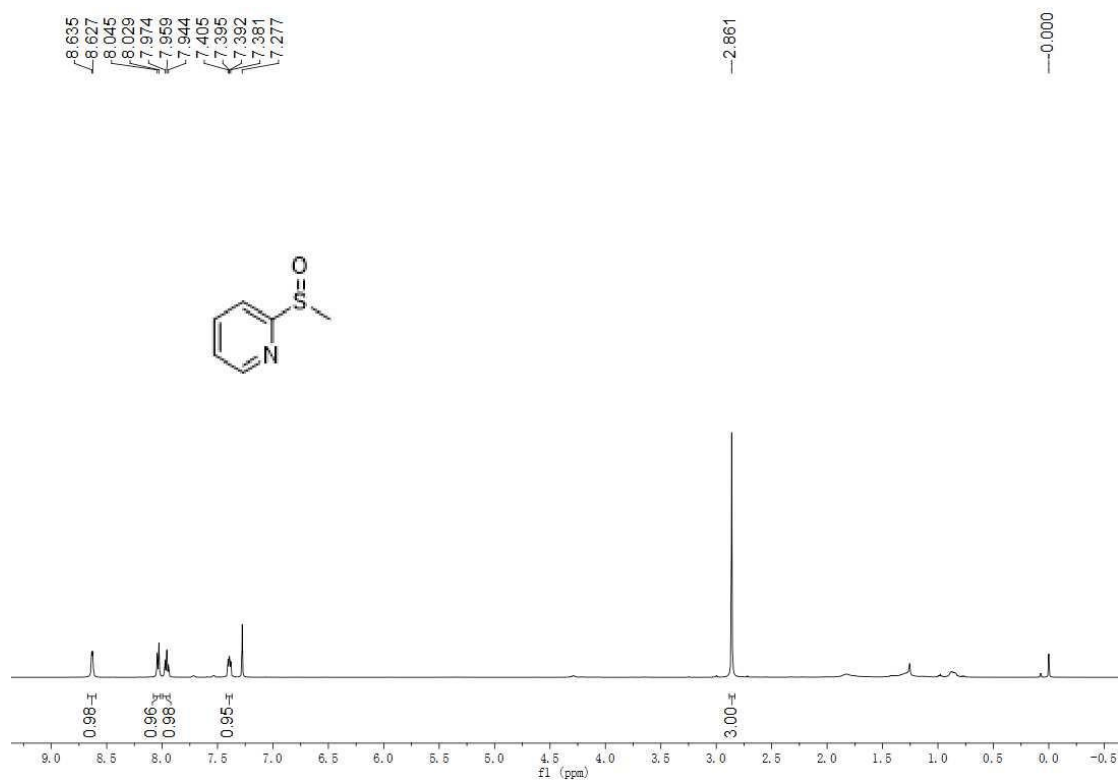

<sup>1</sup>H NMR (500 MHz, CDCl<sub>3</sub>)

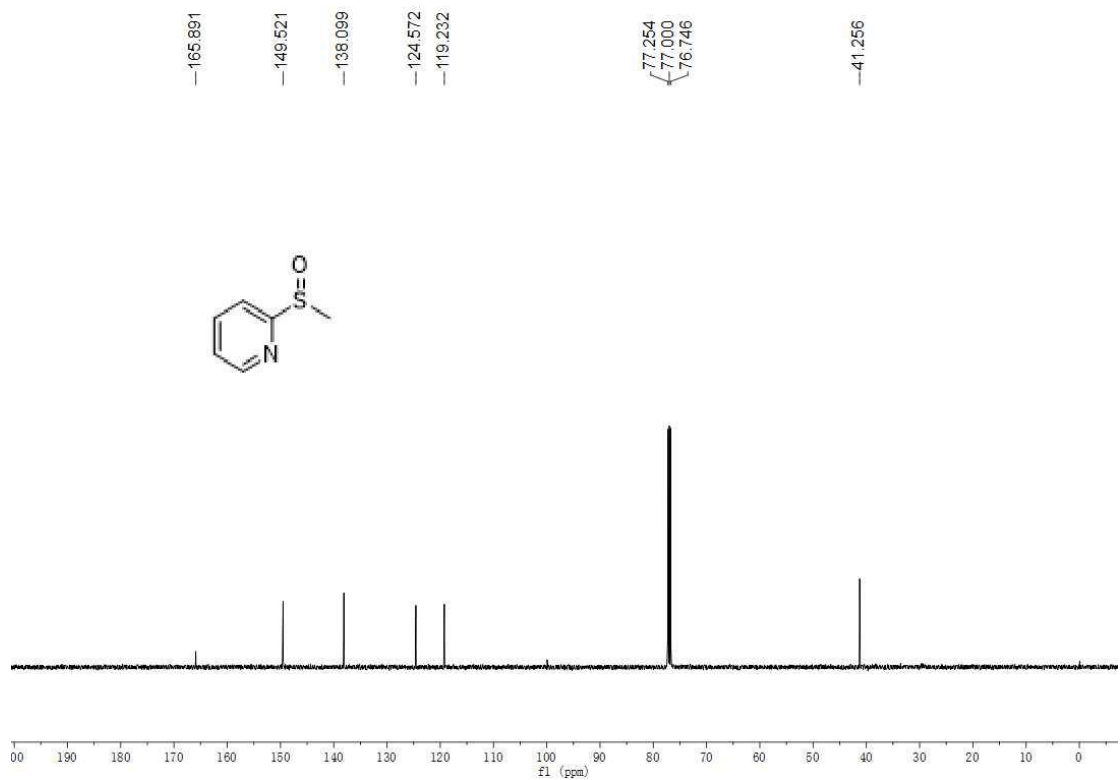

<sup>13</sup>C NMR (125 MHz, CDCl<sub>3</sub>)

## 2-(methylsulfonyl)pyridine (3k)

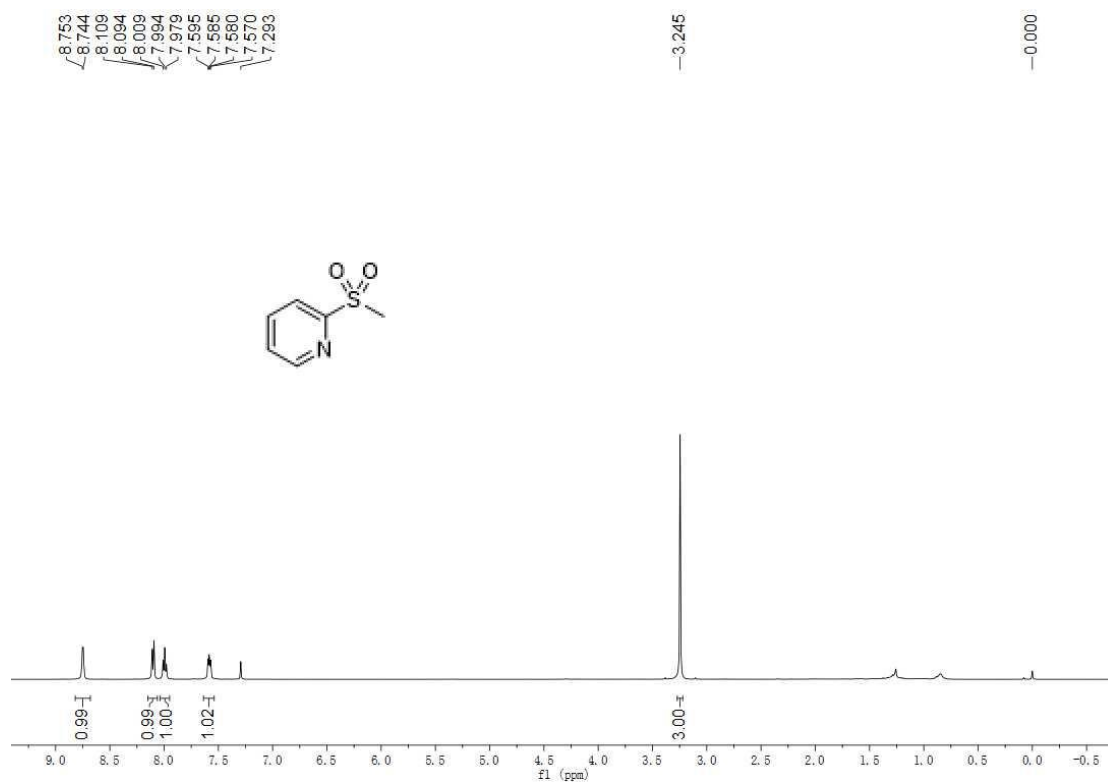

<sup>1</sup>H NMR (500 MHz, CDCl<sub>3</sub>)

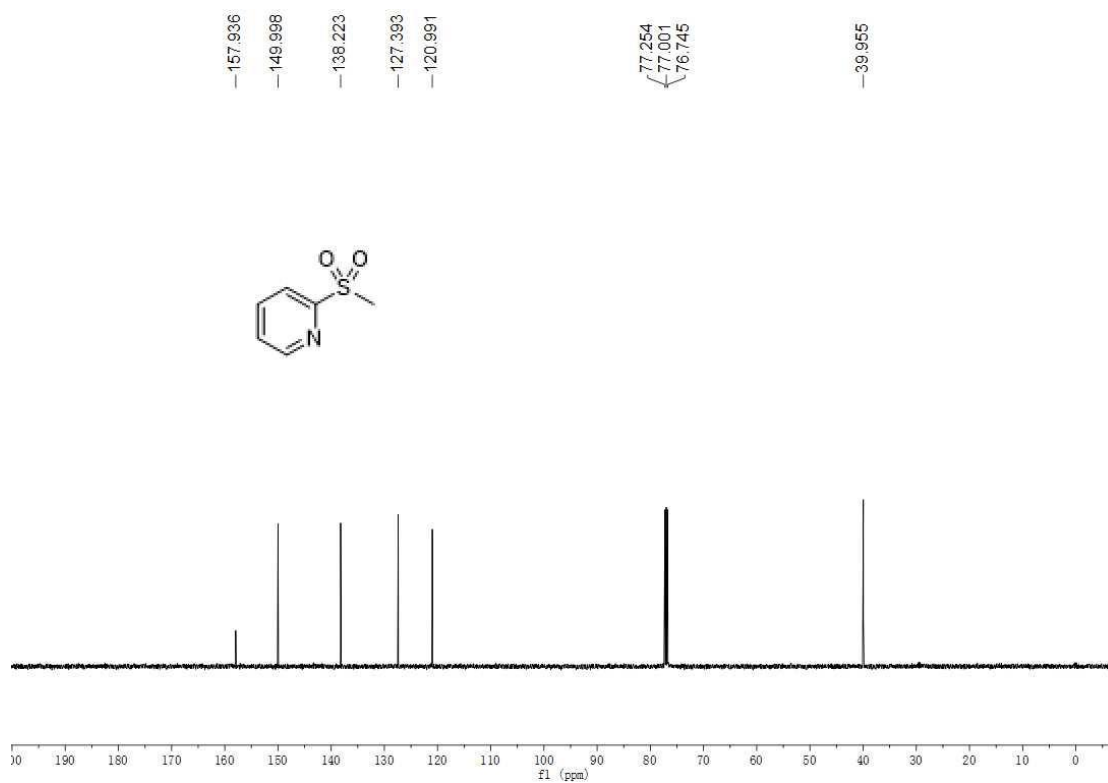

<sup>13</sup>C NMR (125 MHz, CDCl<sub>3</sub>)

(ethylsulfinyl)benzene (2l)

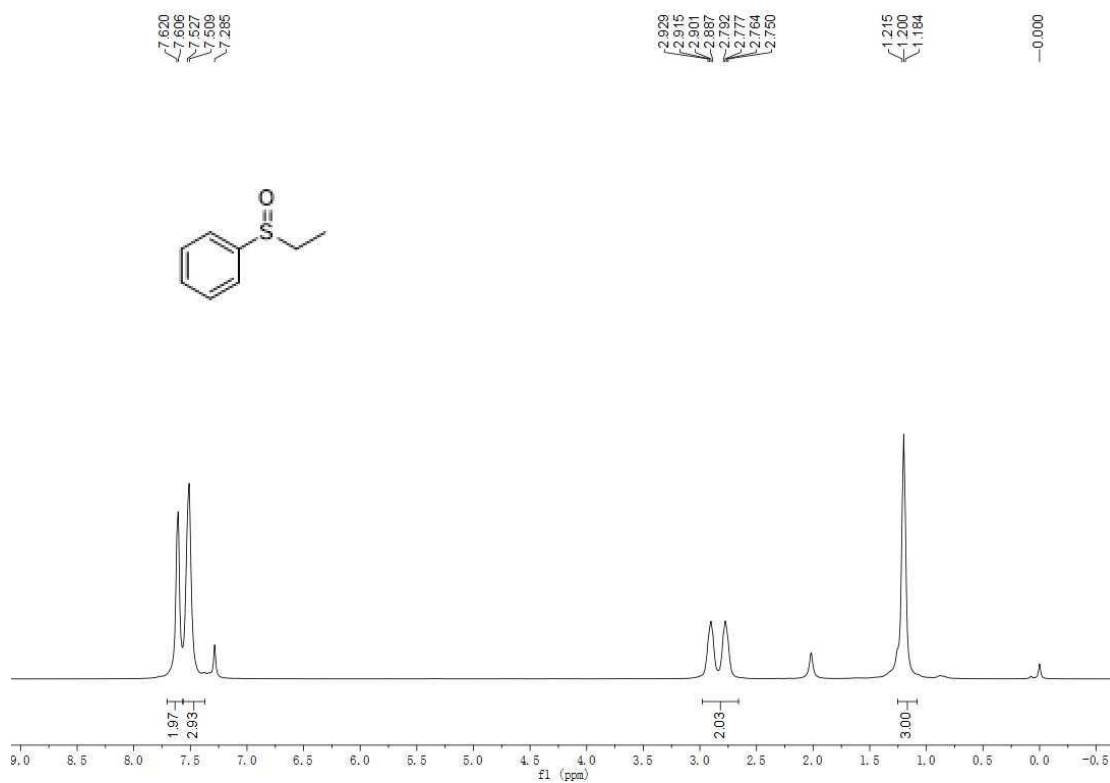

<sup>1</sup>H NMR (500 MHz, CDCl<sub>3</sub>)

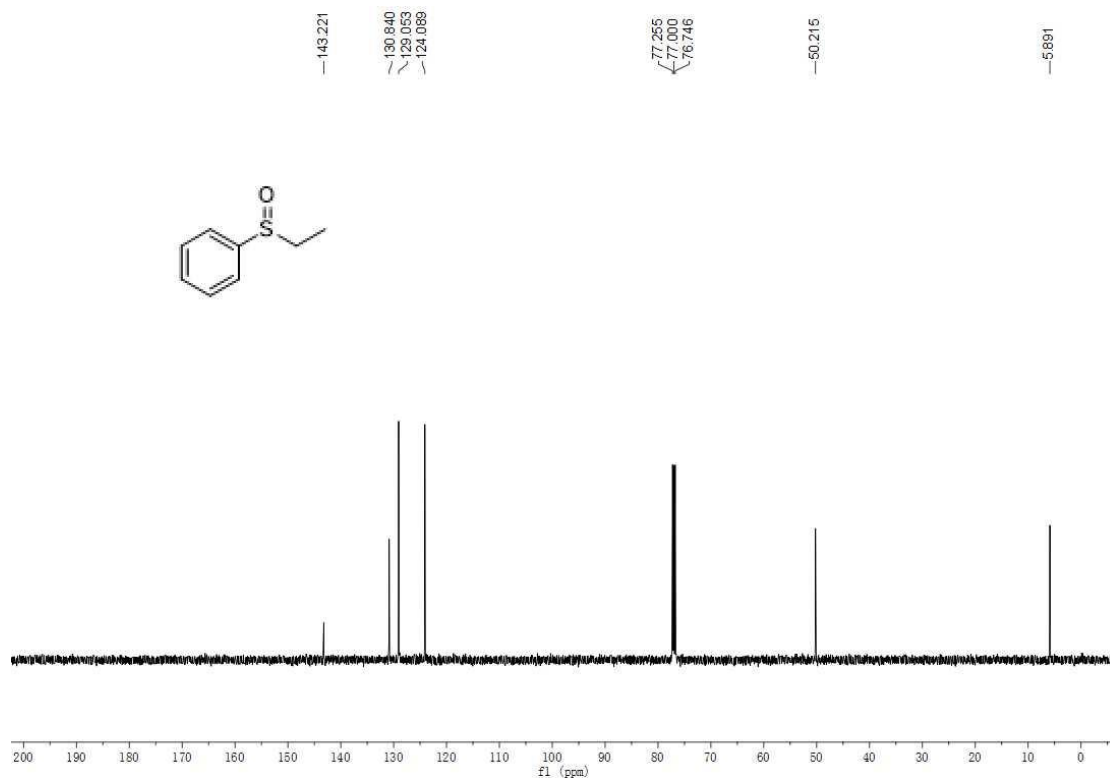

<sup>13</sup>C NMR (125 MHz, CDCl<sub>3</sub>)

(ethylsulfonyl)benzene (3l)

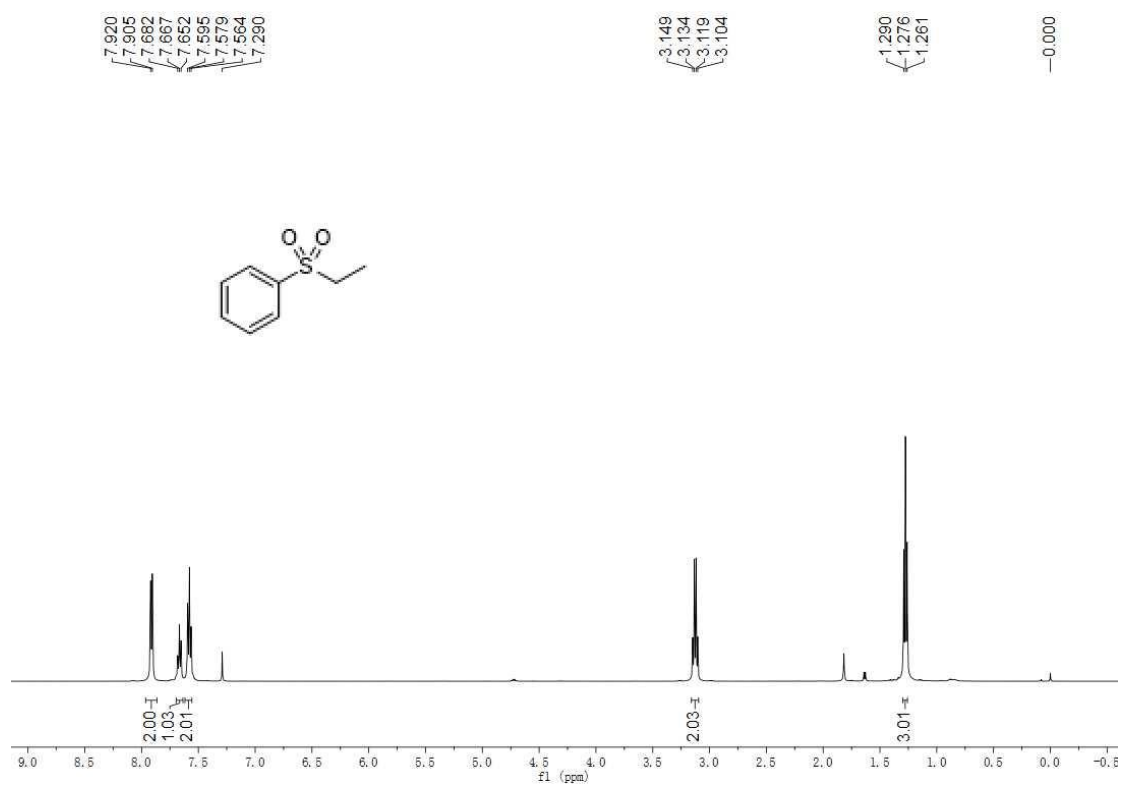

<sup>1</sup>H NMR (500 MHz, CDCl<sub>3</sub>)

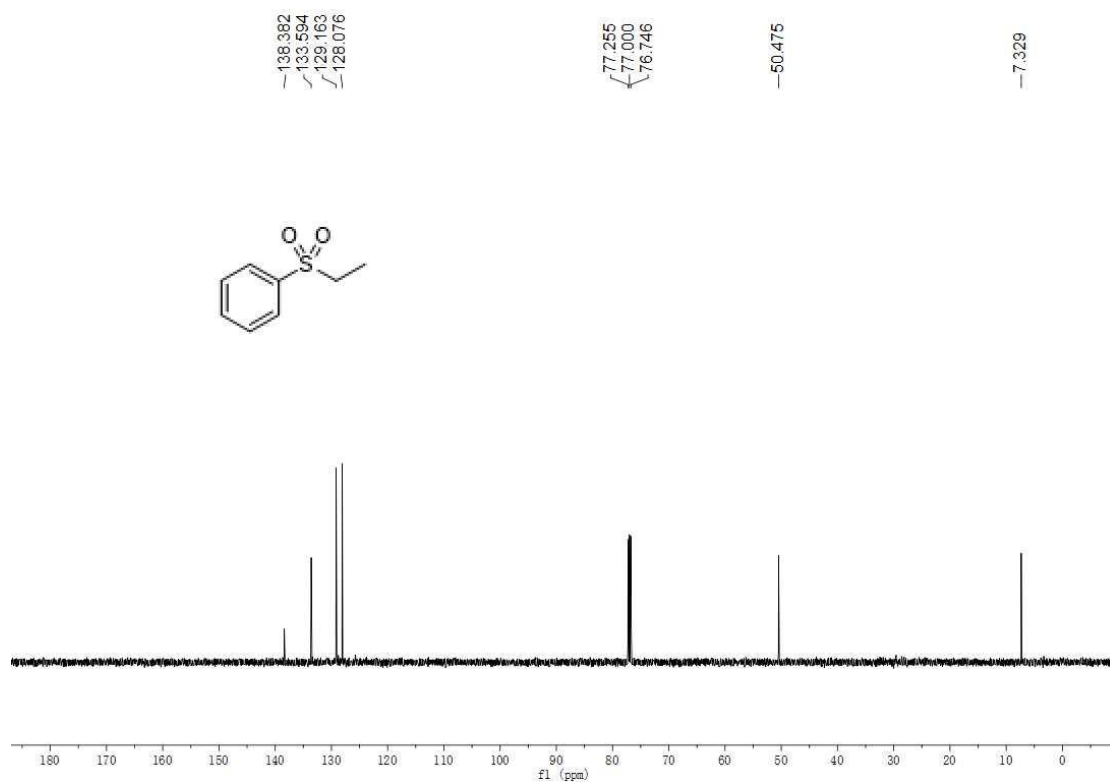

<sup>13</sup>C NMR (125 MHz, CDCl<sub>3</sub>)

(ethylsulfonyl)benzene (2m)

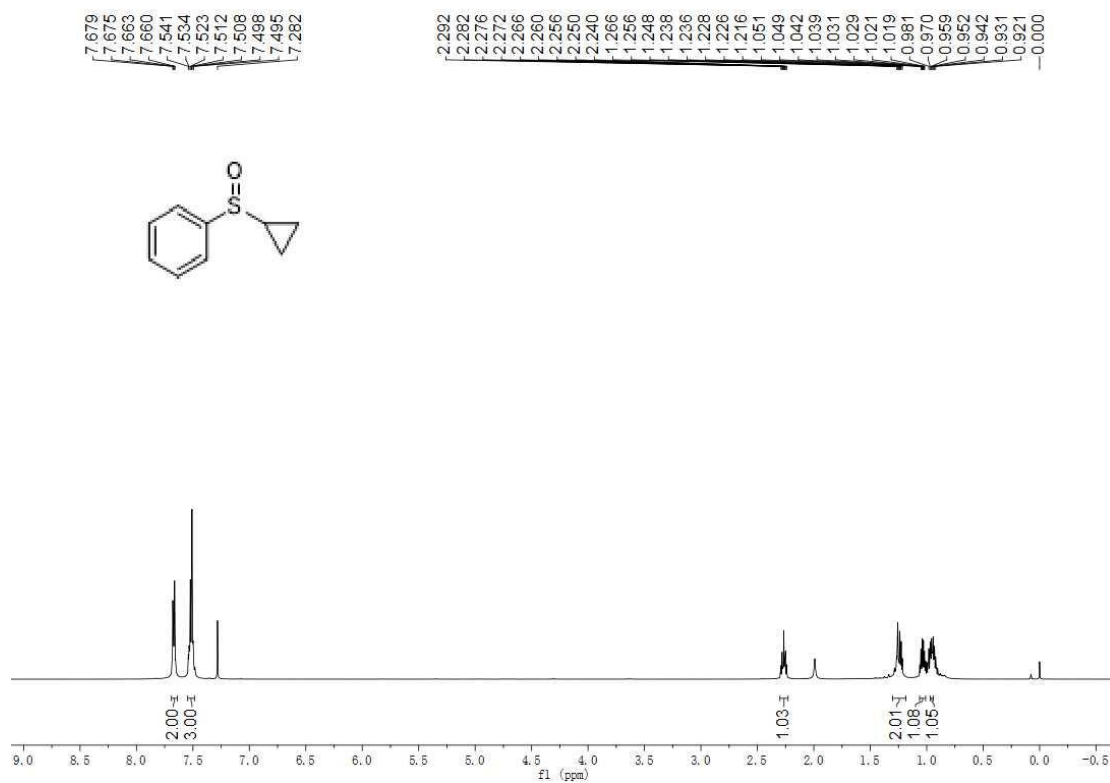

<sup>1</sup>H NMR (500 MHz, CDCl<sub>3</sub>)

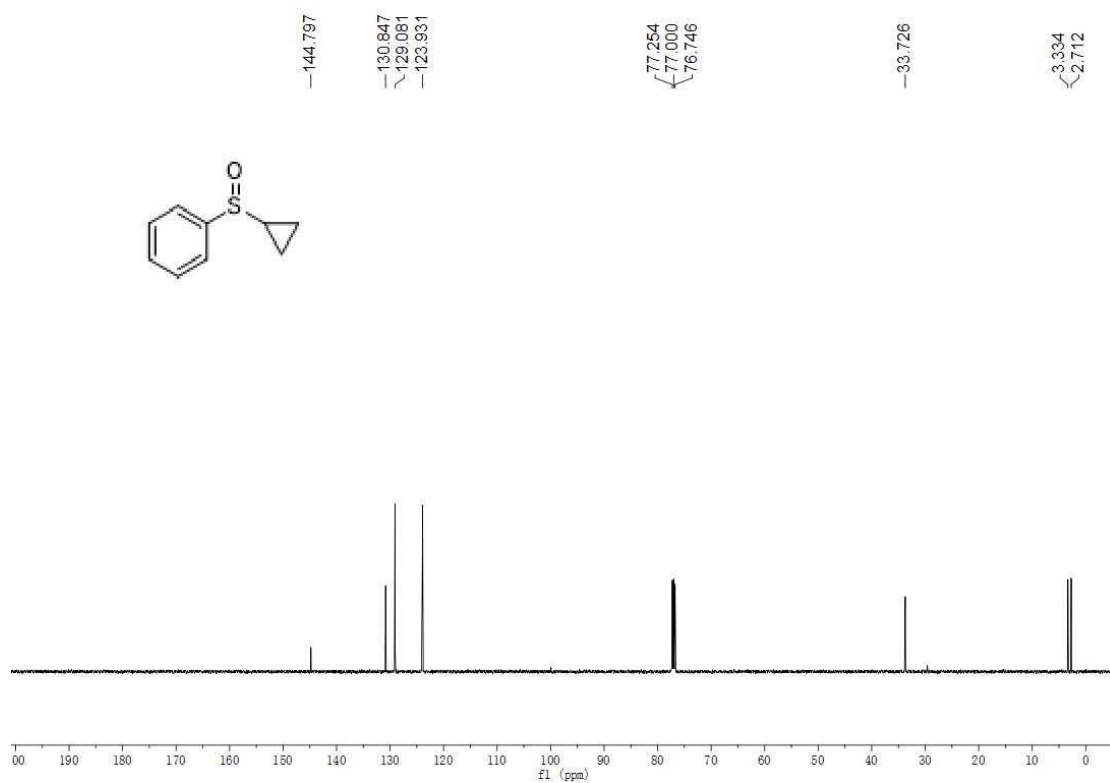

<sup>13</sup>C NMR (125 MHz, CDCl<sub>3</sub>)

(cyclopropylsulfonyl)benzene (3m)

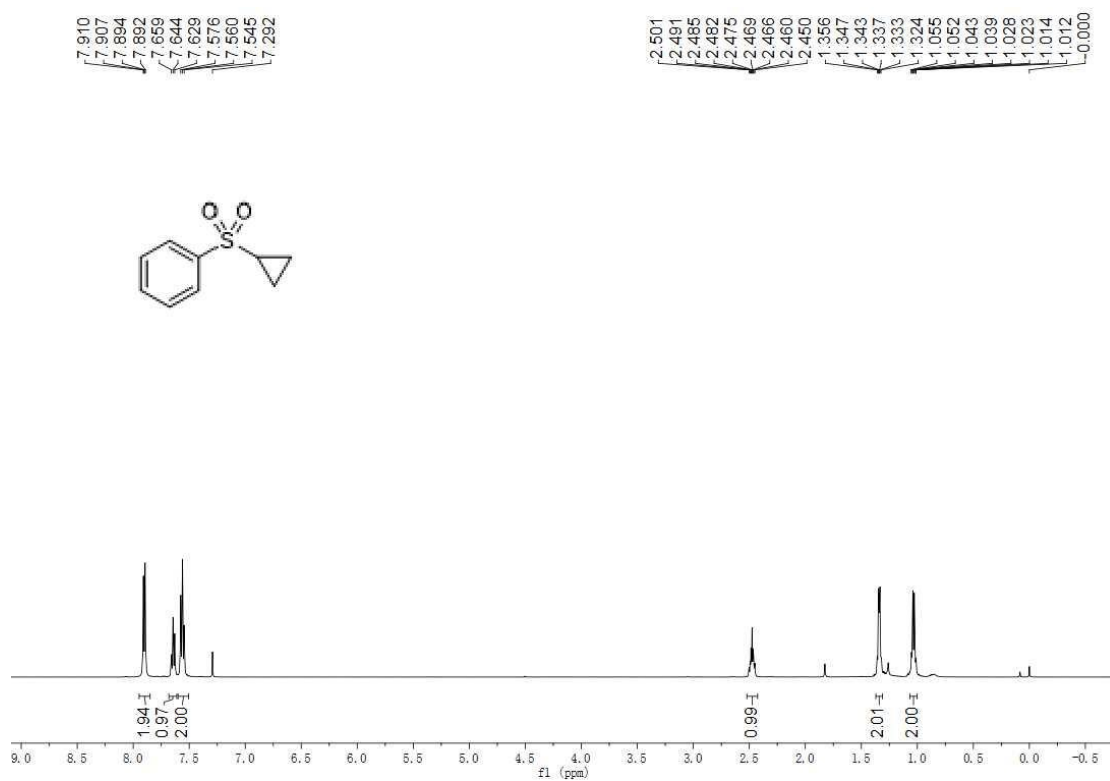

<sup>1</sup>H NMR (500 MHz, CDCl<sub>3</sub>)

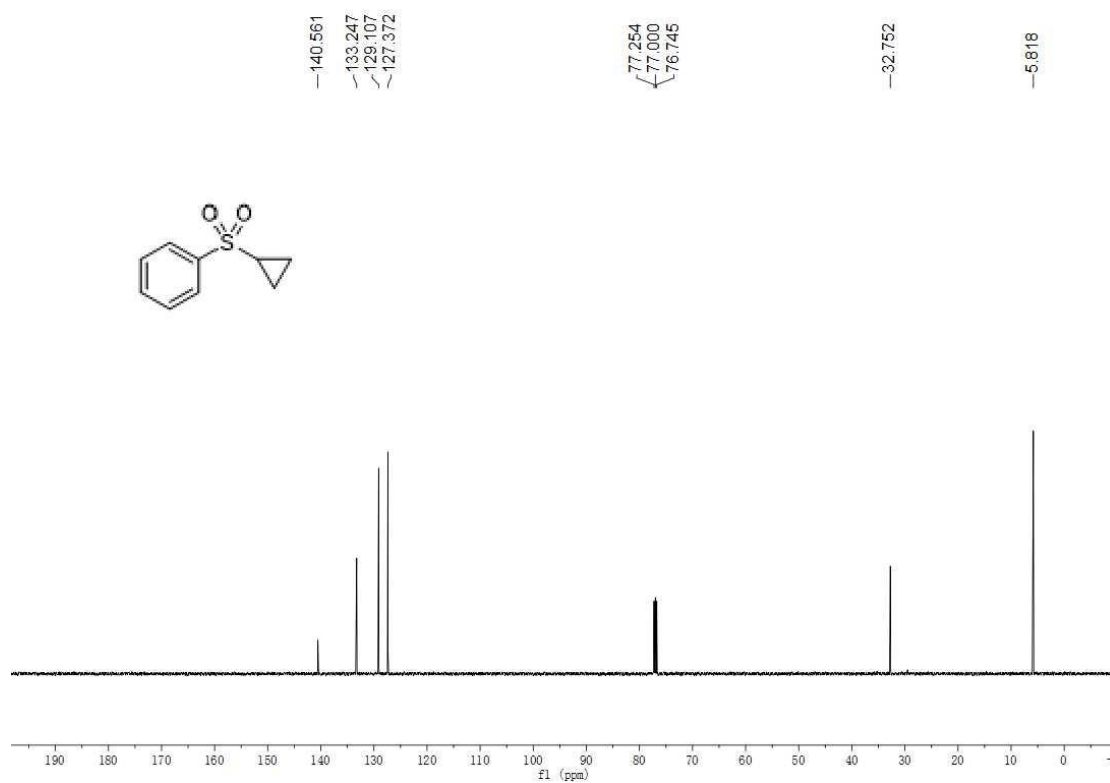

<sup>13</sup>C NMR (125 MHz, CDCl<sub>3</sub>)



## Sulfinyldibenzene (2n)

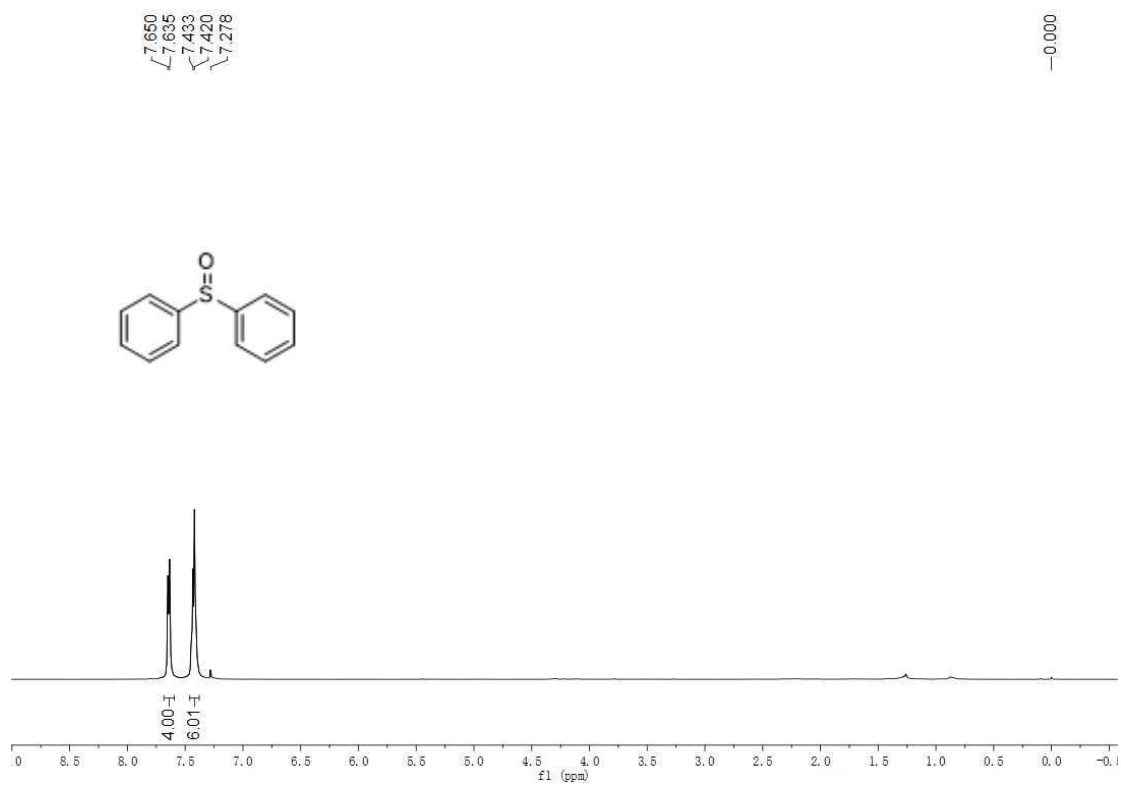

## <sup>1</sup>H NMR (500 MHz, CDCl<sub>3</sub>)

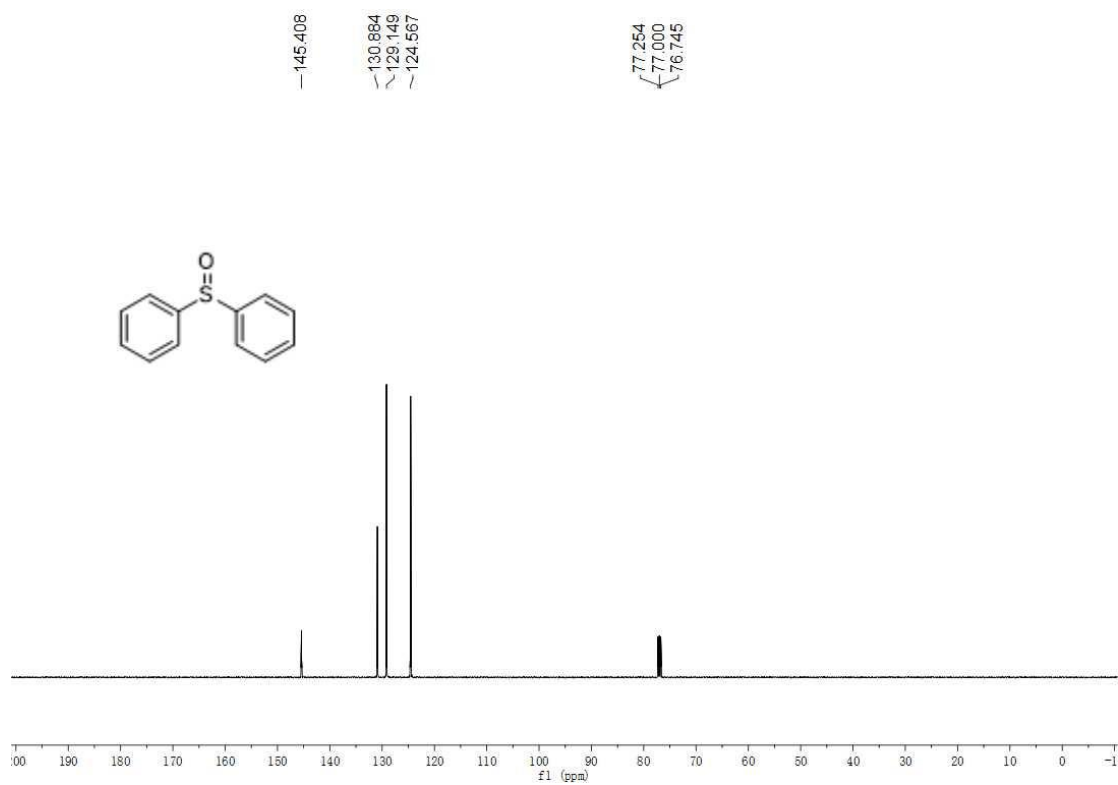

## <sup>13</sup>C NMR (125 MHz, CDCl<sub>3</sub>)

### Sulfonyldibenzene (3n)

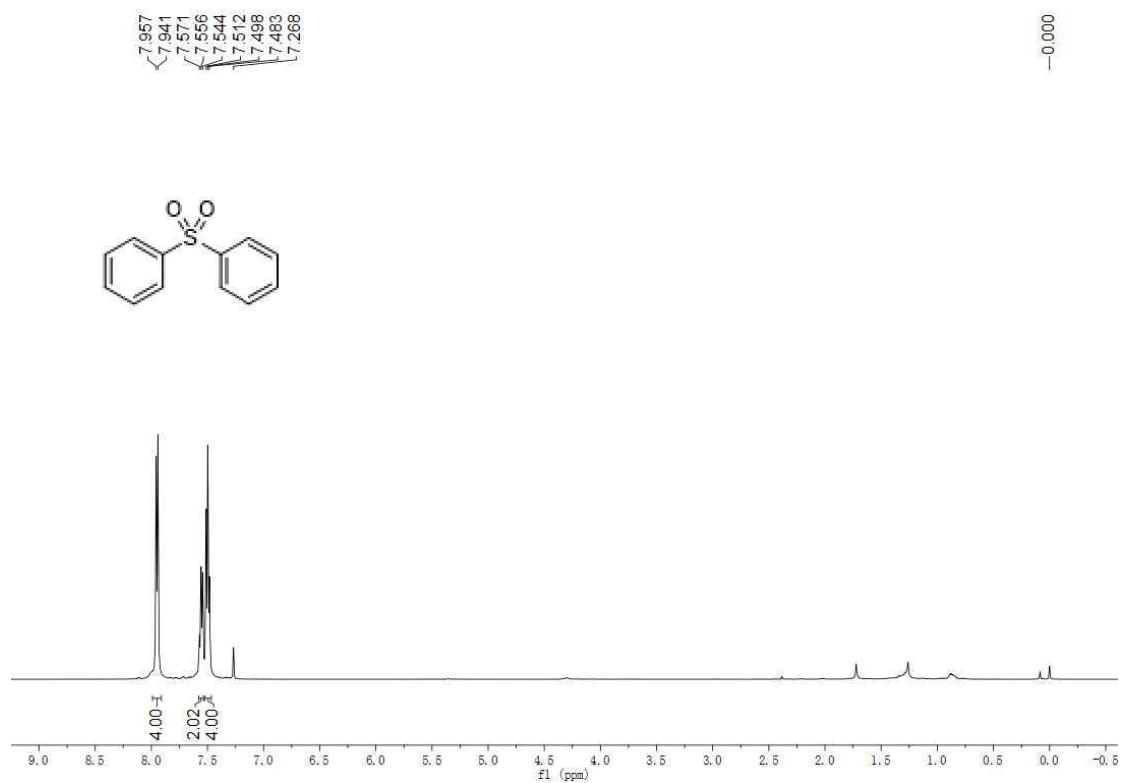

### <sup>1</sup>H NMR (500 MHz, CDCl<sub>3</sub>)

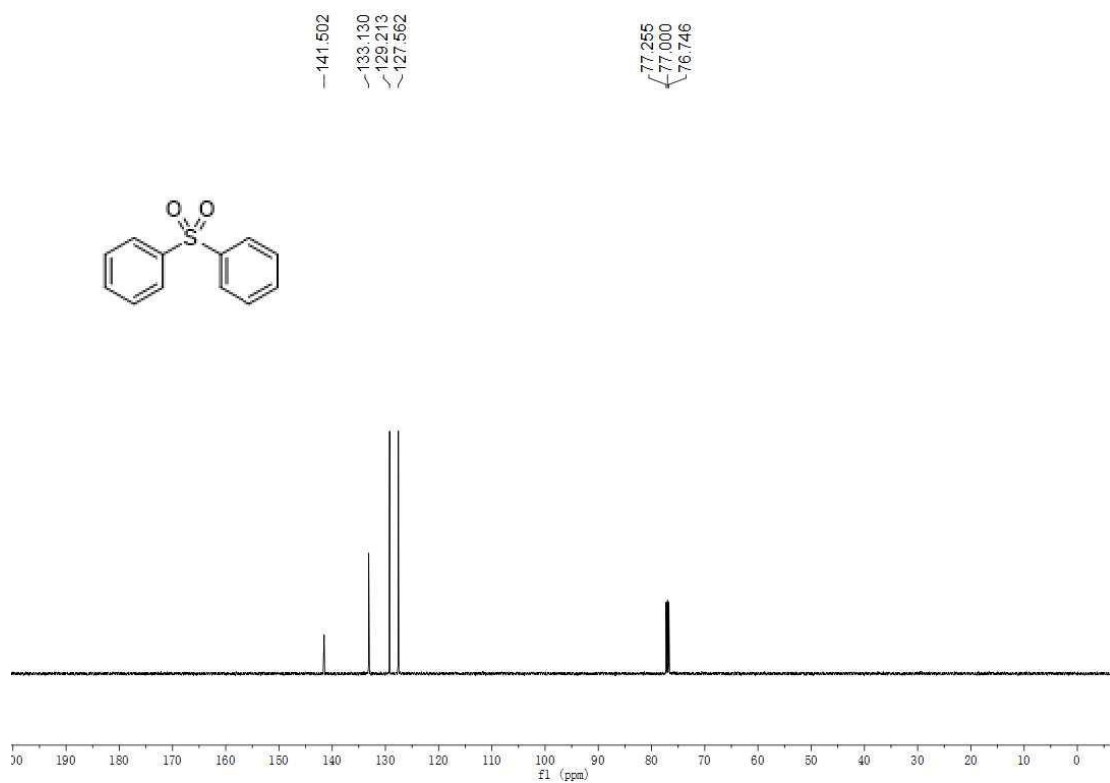

### <sup>13</sup>C NMR (125 MHz, CDCl<sub>3</sub>)

### 4,4'-sulfinylbis(methylbenzene) (2o)

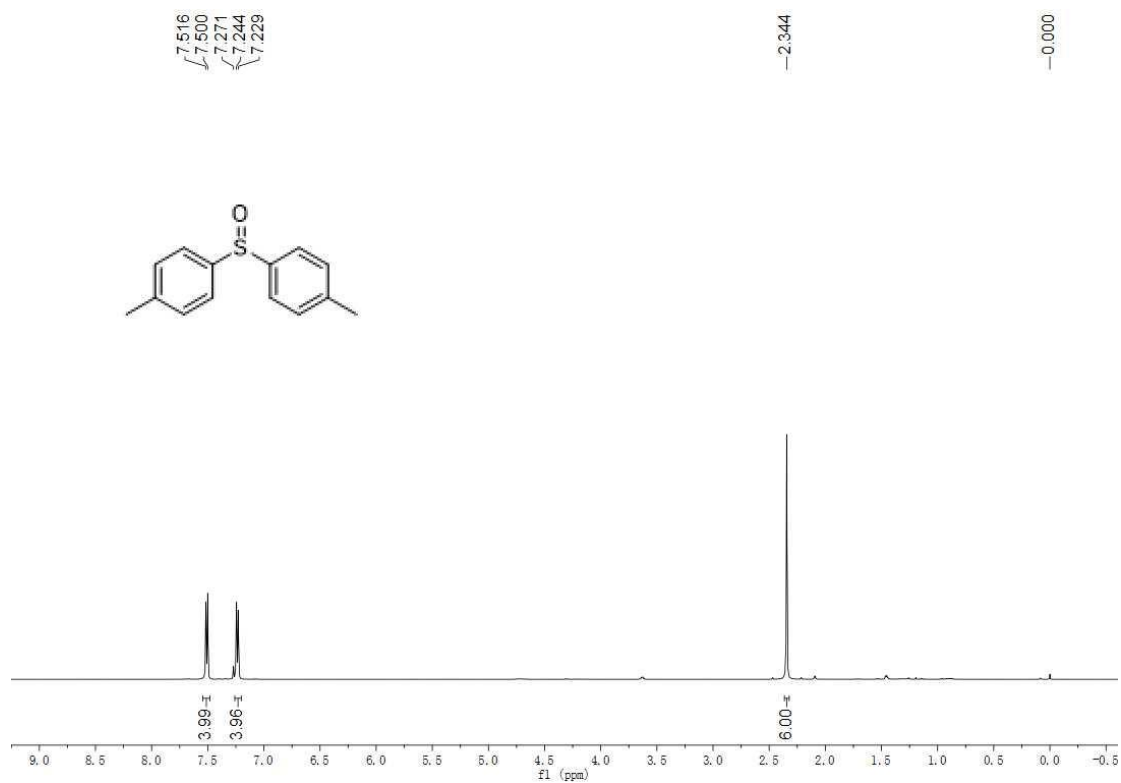

<sup>1</sup>H NMR (500 MHz, CDCl<sub>3</sub>)

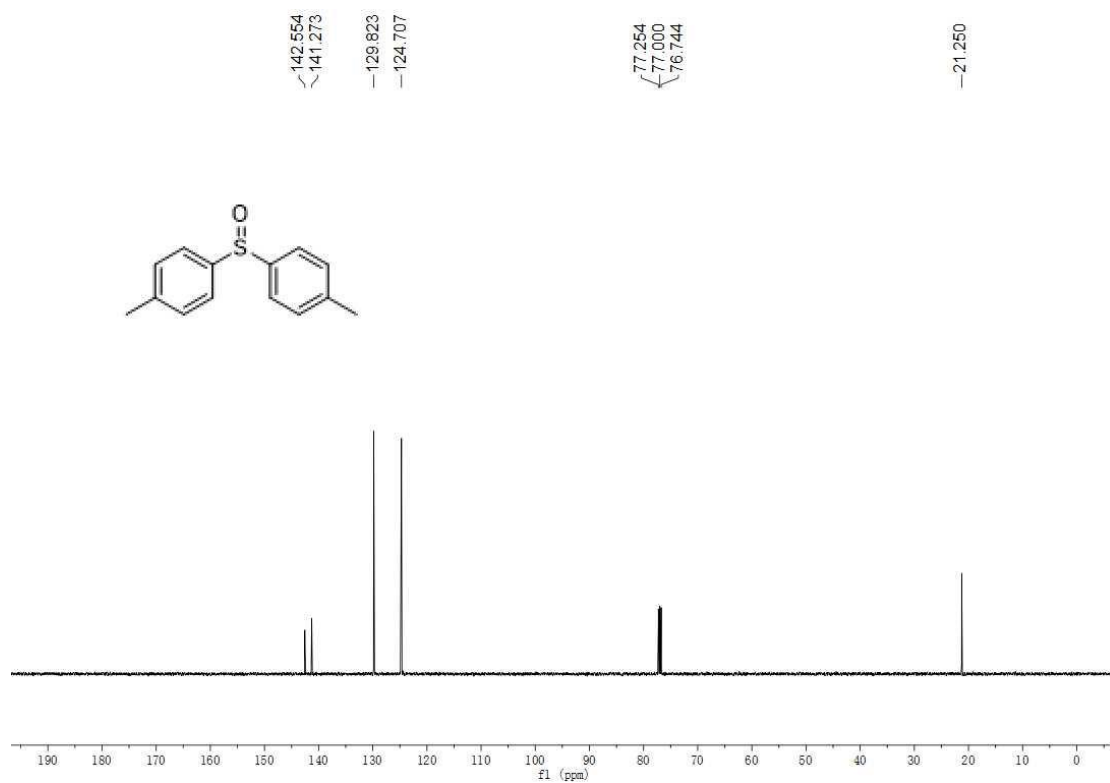

<sup>13</sup>C NMR (125 MHz, CDCl<sub>3</sub>)

### 4,4'-sulfonylbis(methylbenzene) (3o)

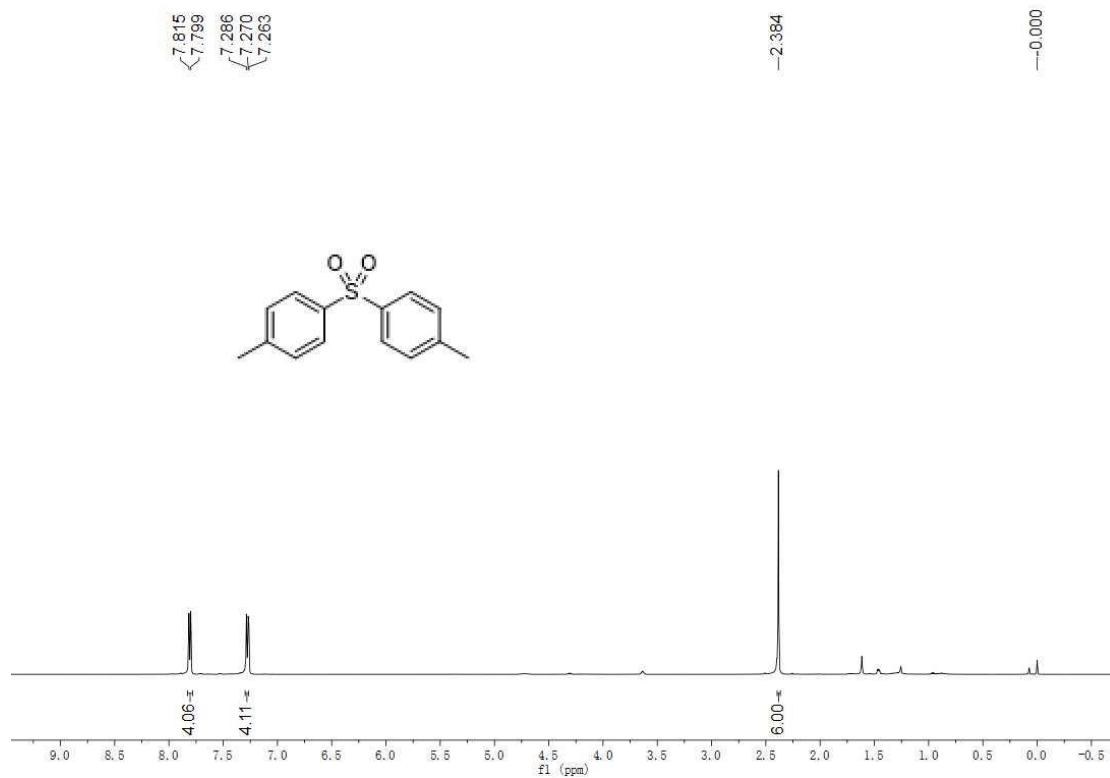

### <sup>1</sup>H NMR (500 MHz, CDCl<sub>3</sub>)

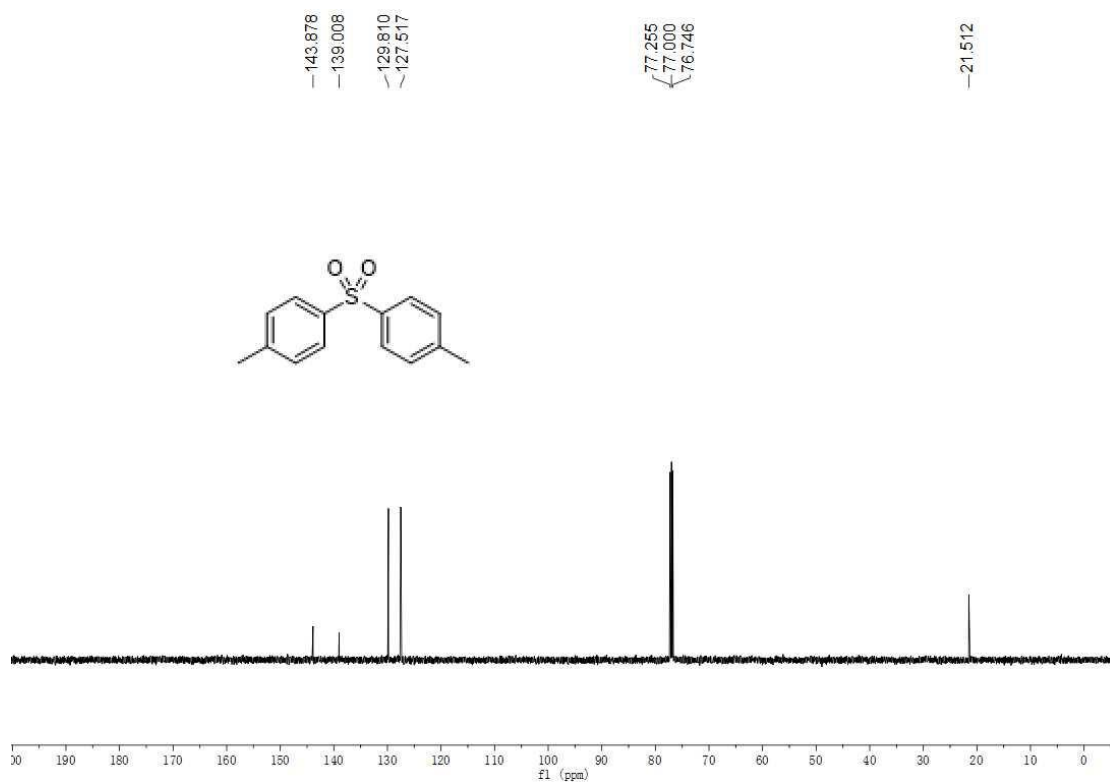

### <sup>13</sup>C NMR (125 MHz, CDCl<sub>3</sub>)

### 4,4'-sulfinylbis(methoxybenzene) (2p)

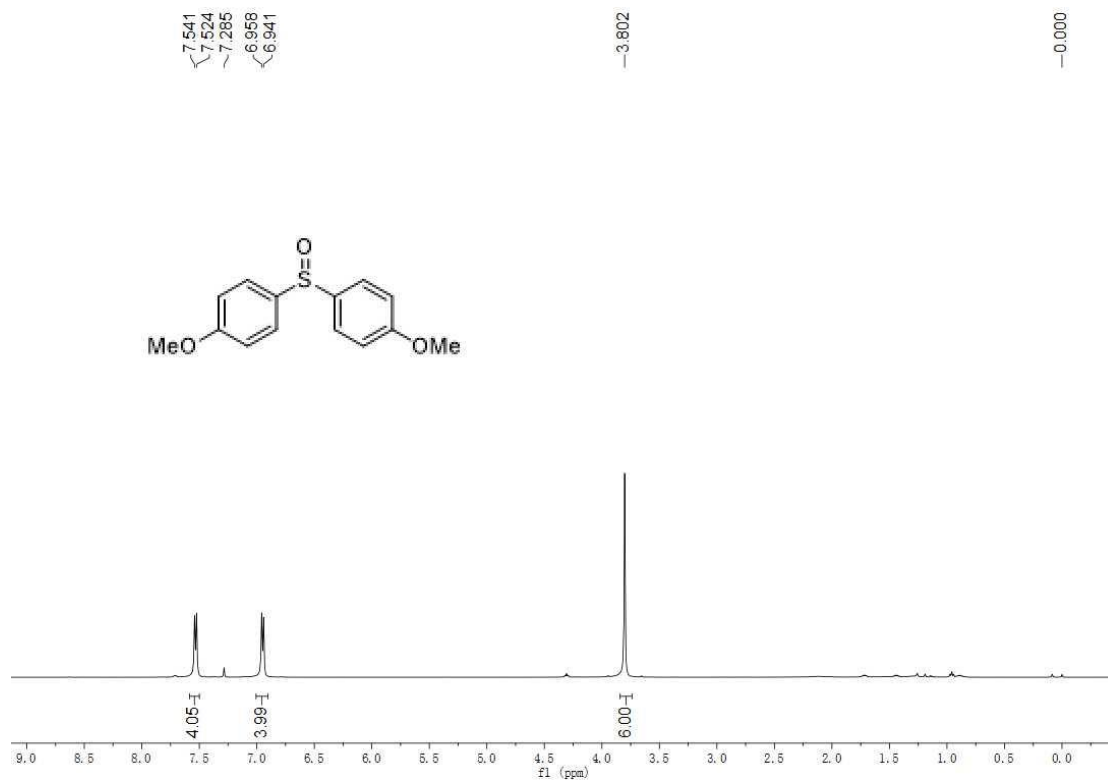

<sup>1</sup>H NMR (500 MHz, CDCl<sub>3</sub>)

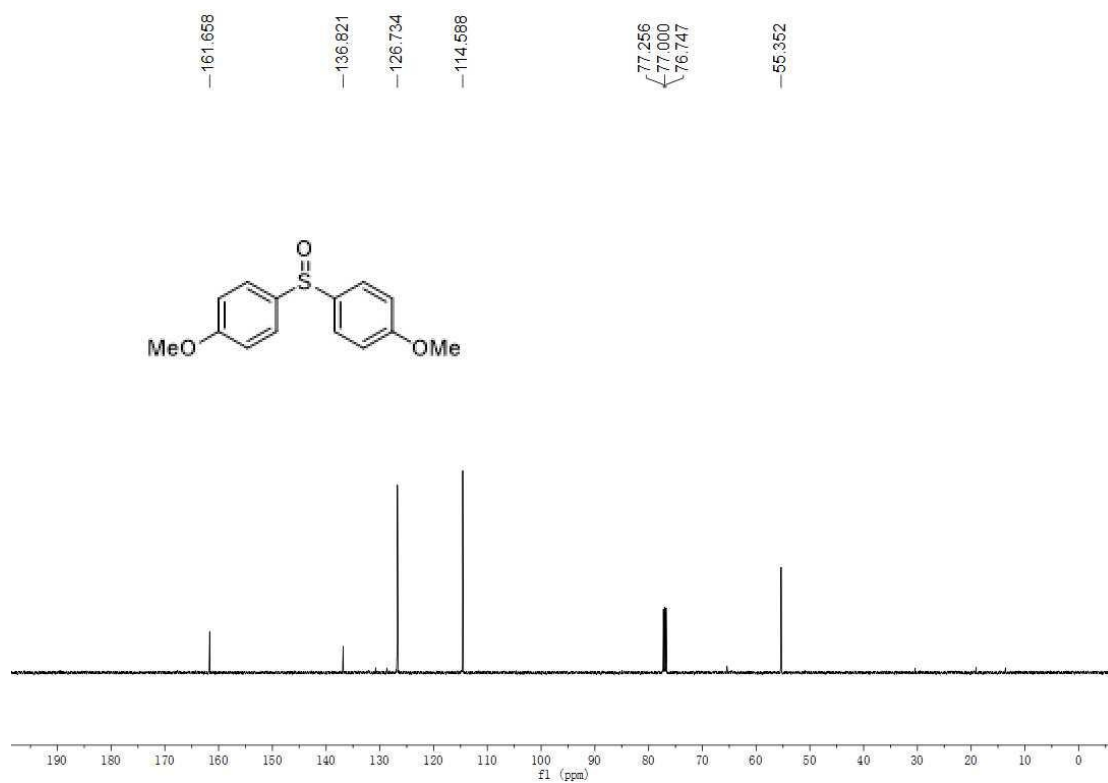

<sup>13</sup>C NMR (125 MHz, CDCl<sub>3</sub>)

### 4,4'-sulfonylbis(methoxybenzene) (3p)

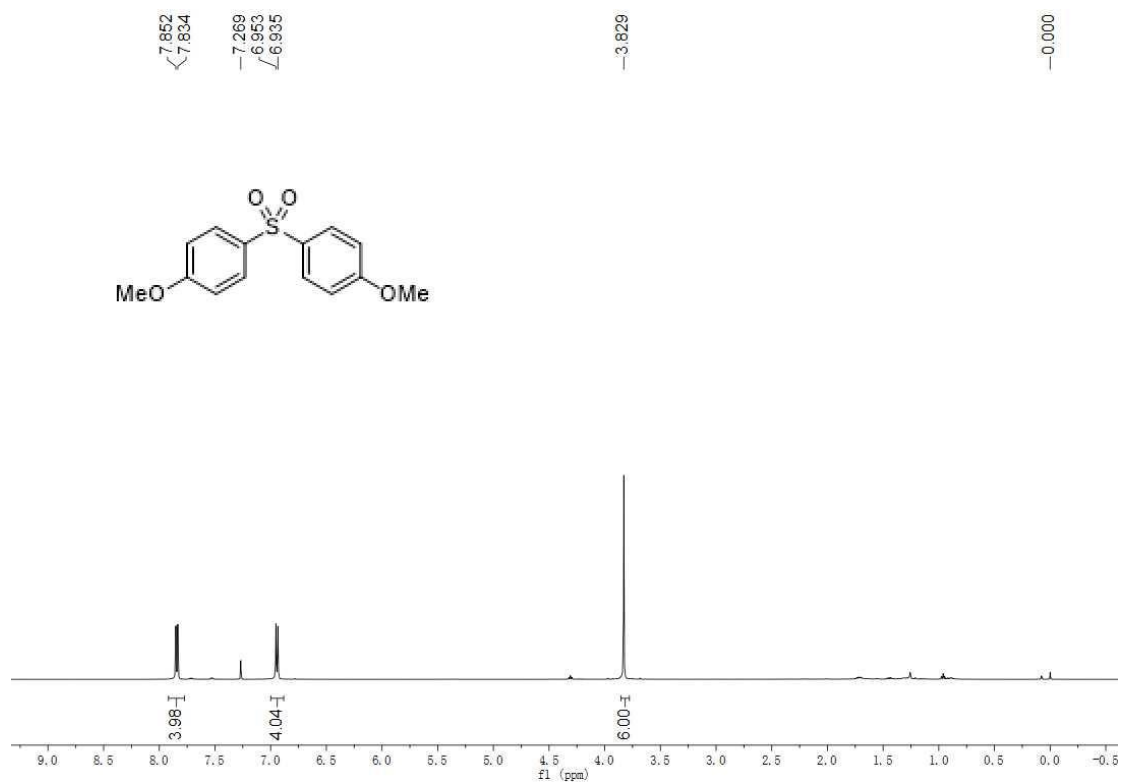

### <sup>1</sup>H NMR (500 MHz, CDCl<sub>3</sub>)

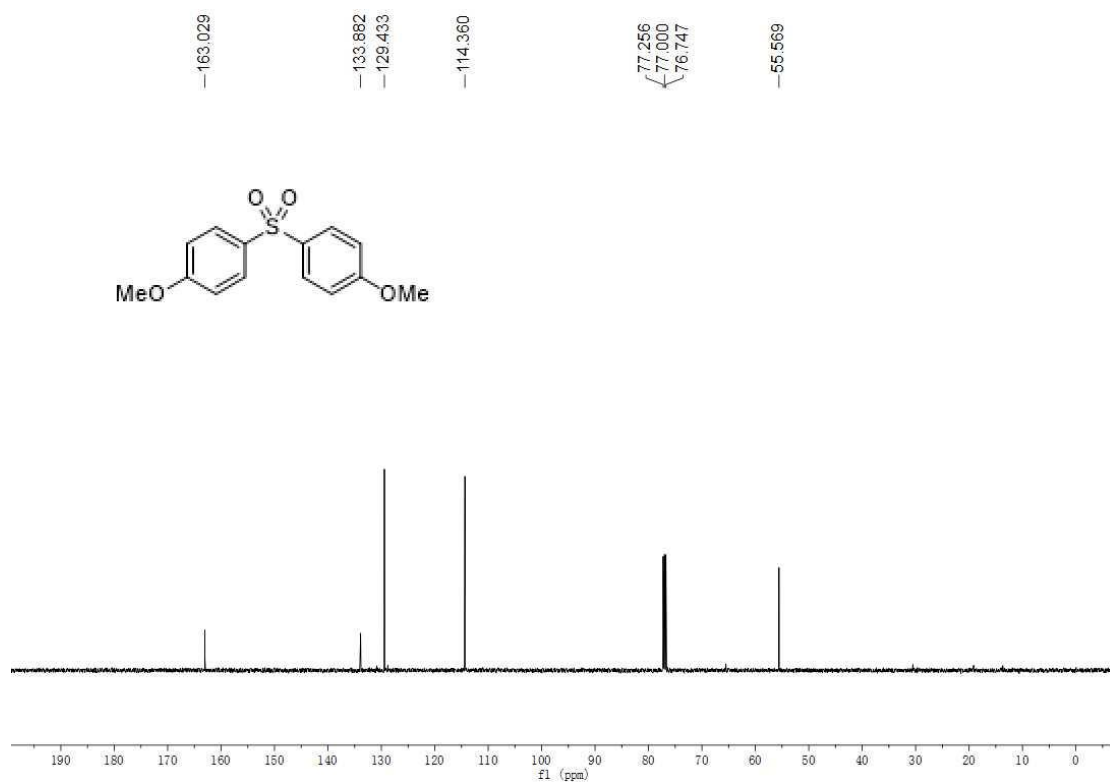

### <sup>13</sup>C NMR (125 MHz, CDCl<sub>3</sub>)

### 4,4'-sulfinylbis(bromobenzene) (2q)

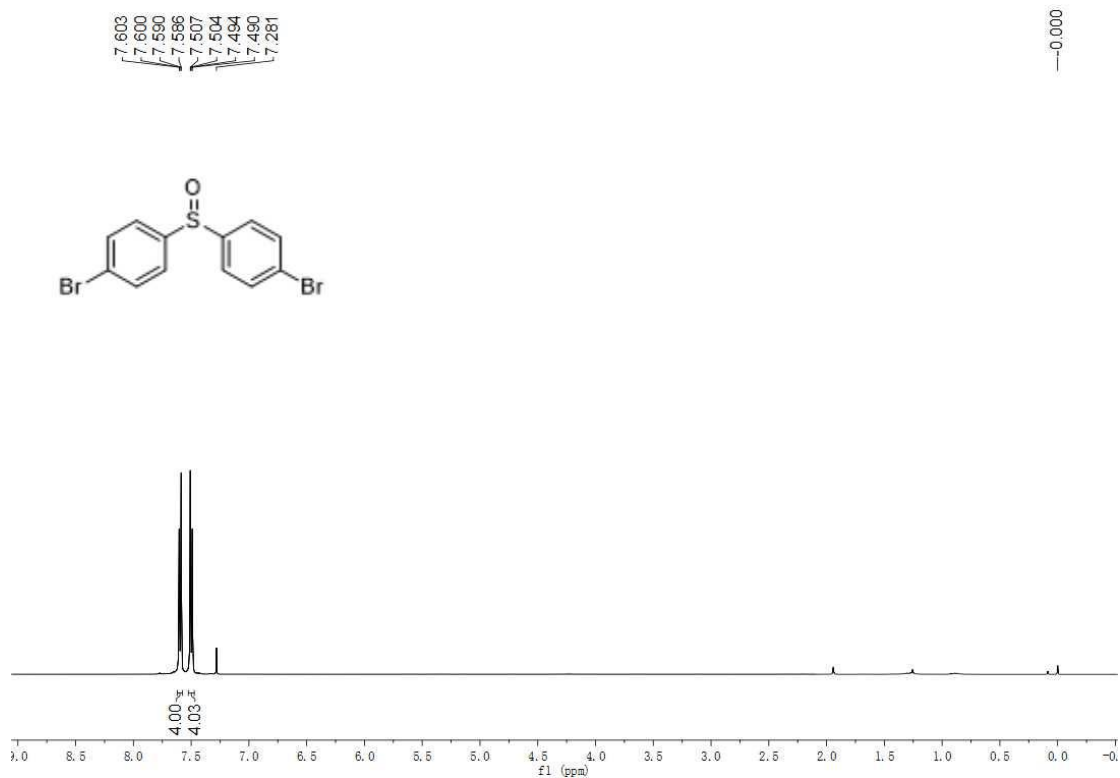

### <sup>1</sup>H NMR (500 MHz, CDCl<sub>3</sub>)

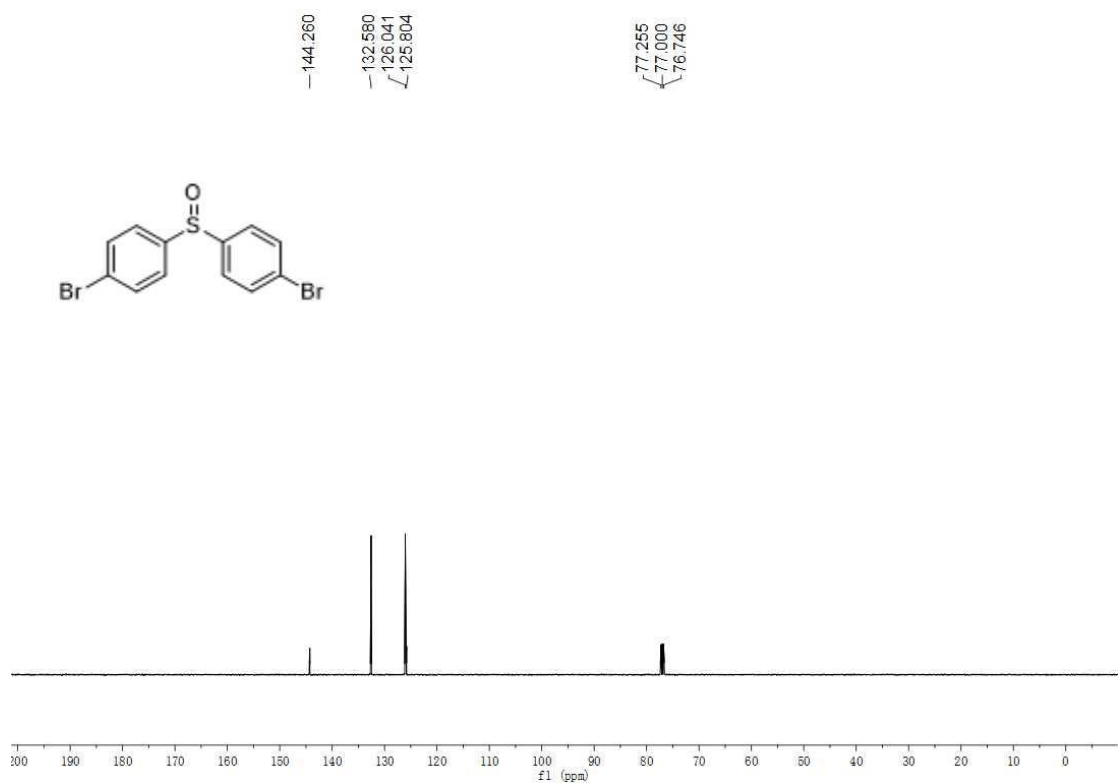

### <sup>13</sup>C NMR (125 MHz, CDCl<sub>3</sub>)

### 4,4'-sulfonylbis(bromobenzene) (3q)

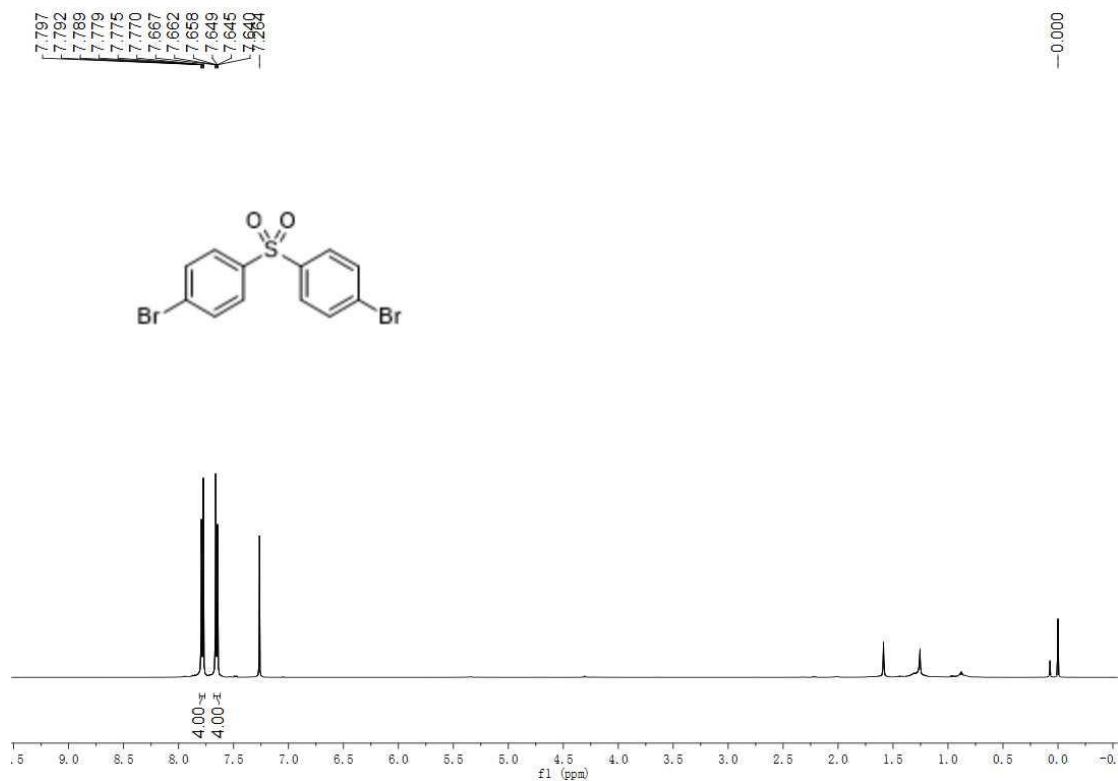

<sup>1</sup>H NMR (500 MHz, CDCl<sub>3</sub>)

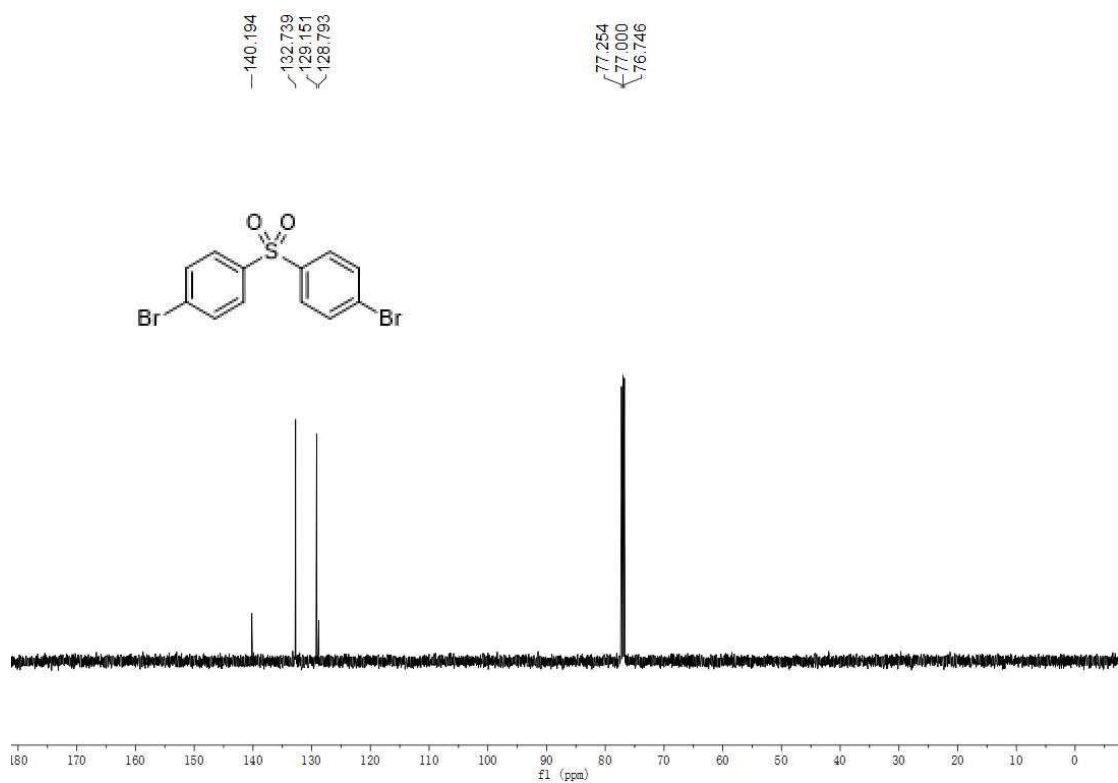

<sup>13</sup>C NMR (125 MHz, CDCl<sub>3</sub>)



# 1-methyl-4-(phenylsulfinyl)benzene (2r)

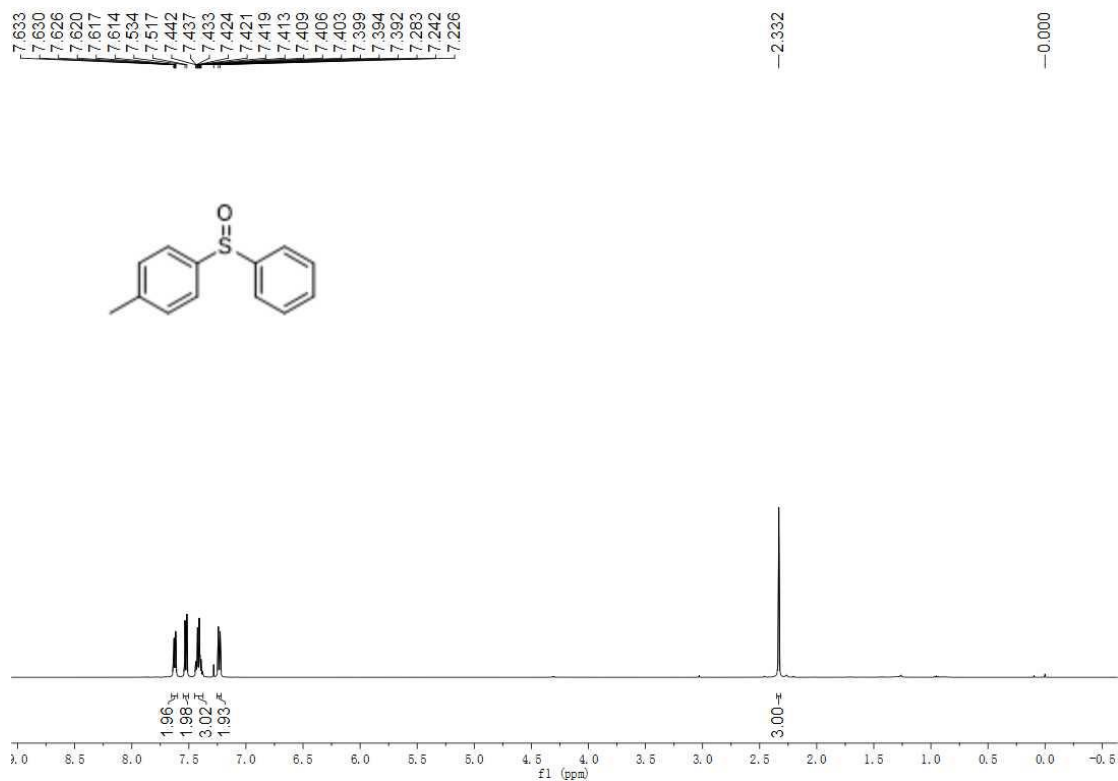

<sup>1</sup>H NMR (500 MHz, CDCl<sub>3</sub>)

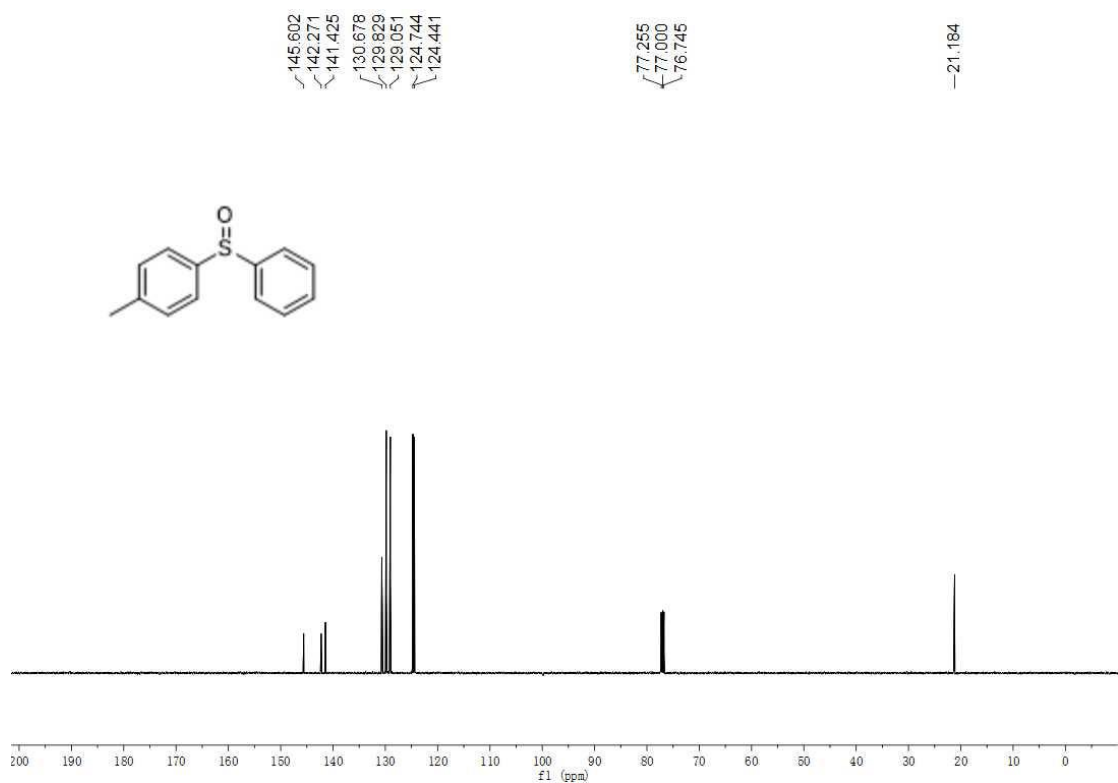

<sup>13</sup>C NMR (125 MHz, CDCl<sub>3</sub>)

### 1-methyl-4-(phenylsulfonyl)benzene (3r)

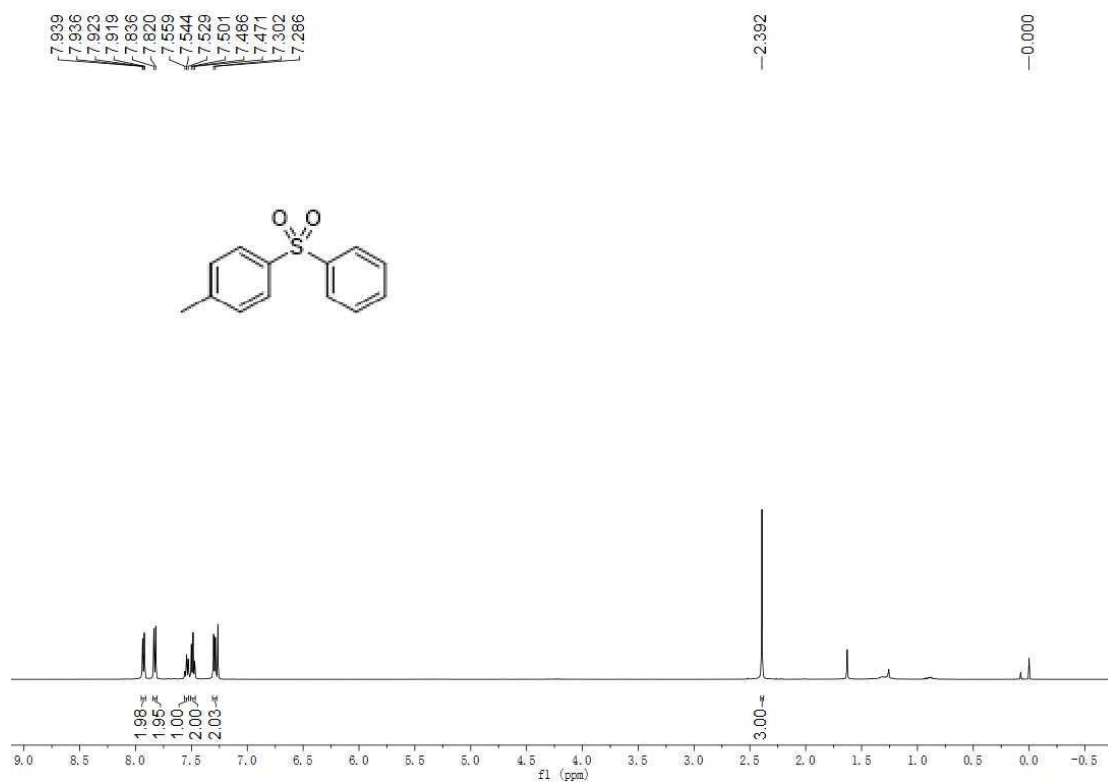

<sup>1</sup>H NMR (500 MHz, CDCl<sub>3</sub>)

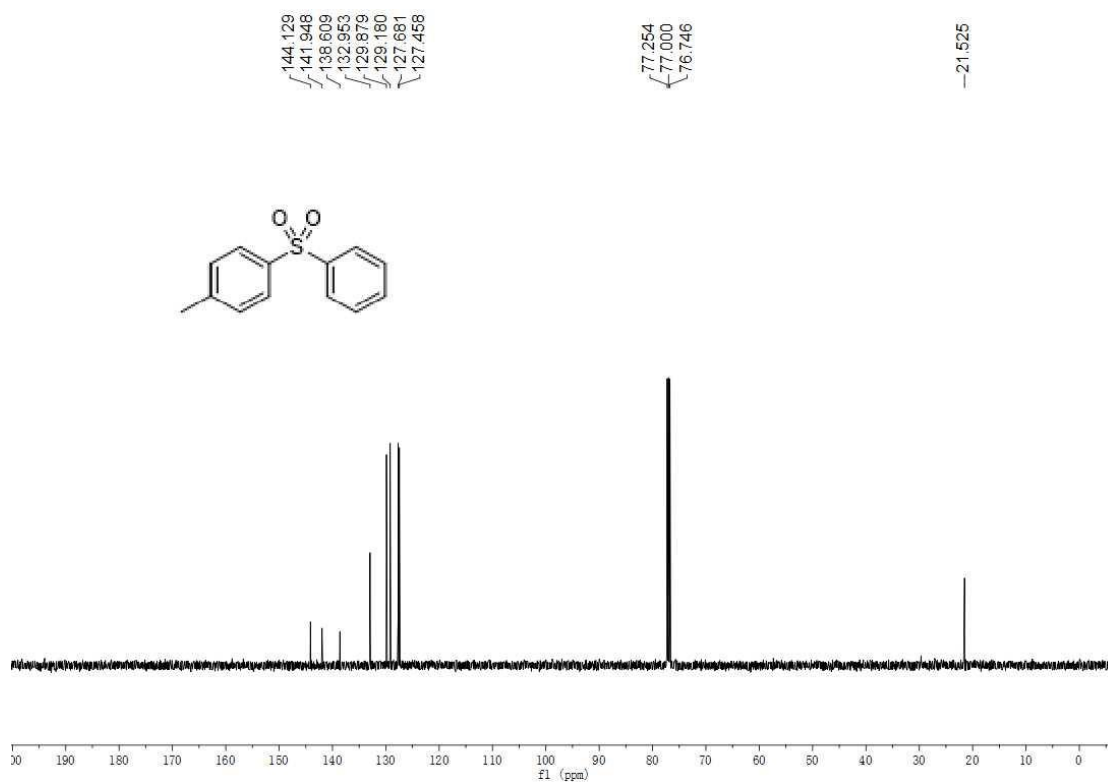

<sup>13</sup>C NMR (125 MHz, CDCl<sub>3</sub>)

**tetrahydro-2H-thiopyran 1-oxide (2s)**

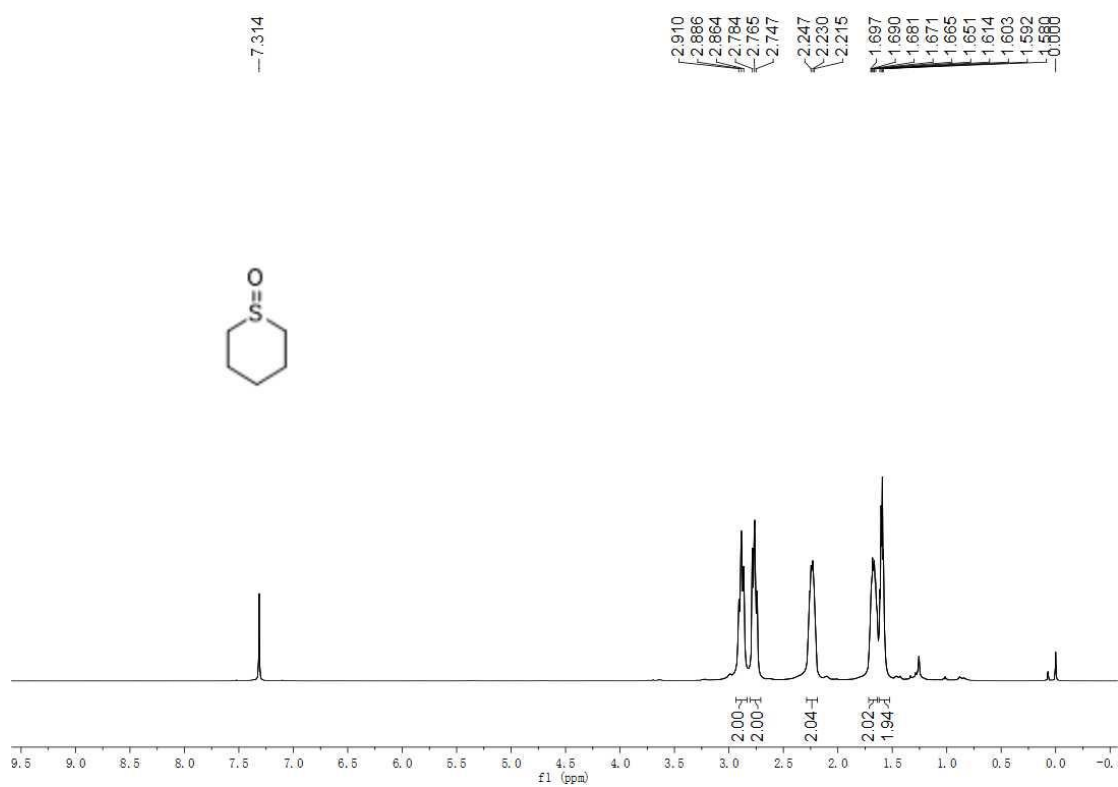

**<sup>1</sup>H NMR (500 MHz, CDCl<sub>3</sub>)**

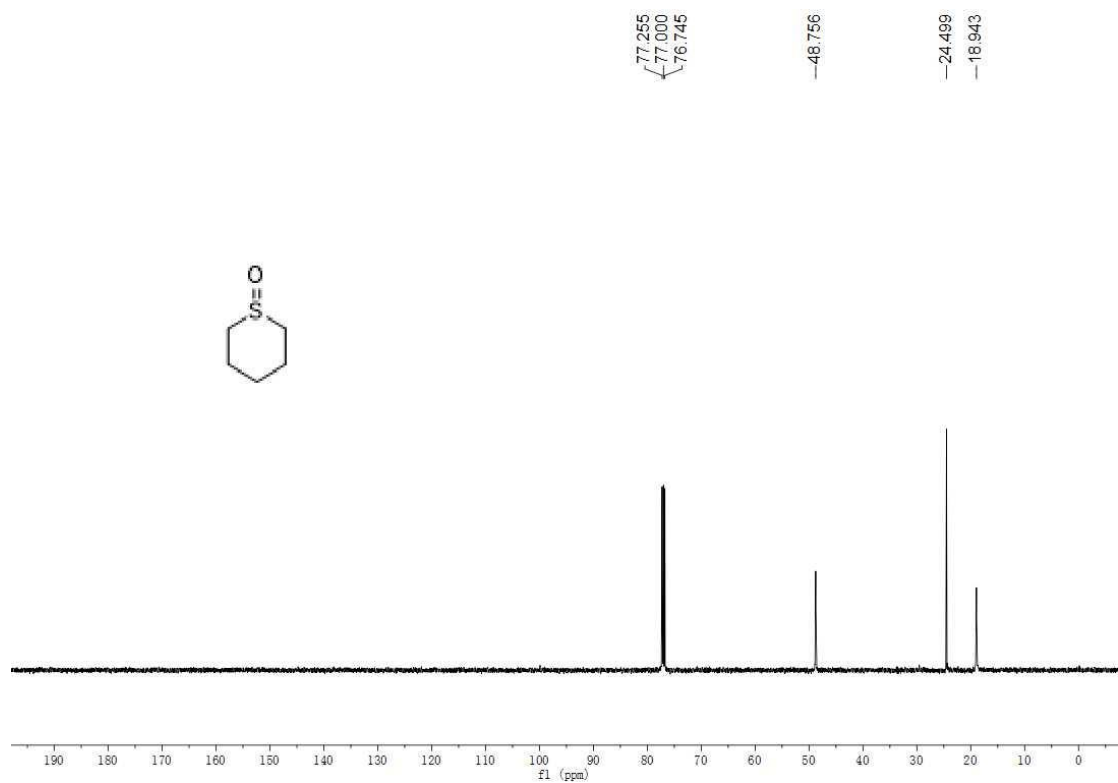

**<sup>13</sup>C NMR (125 MHz, CDCl<sub>3</sub>)**

**tetrahydro-2H-thiopyran 1,1-dioxide (3s)**

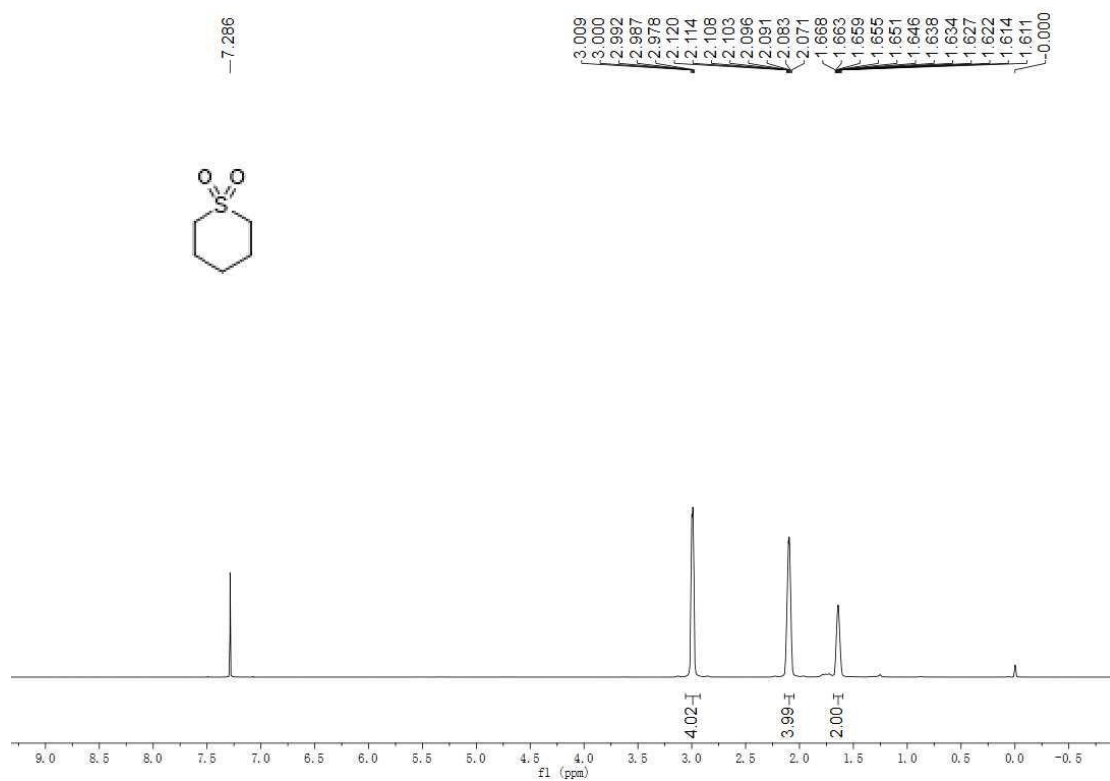

**<sup>1</sup>H NMR (500 MHz, CDCl<sub>3</sub>)**

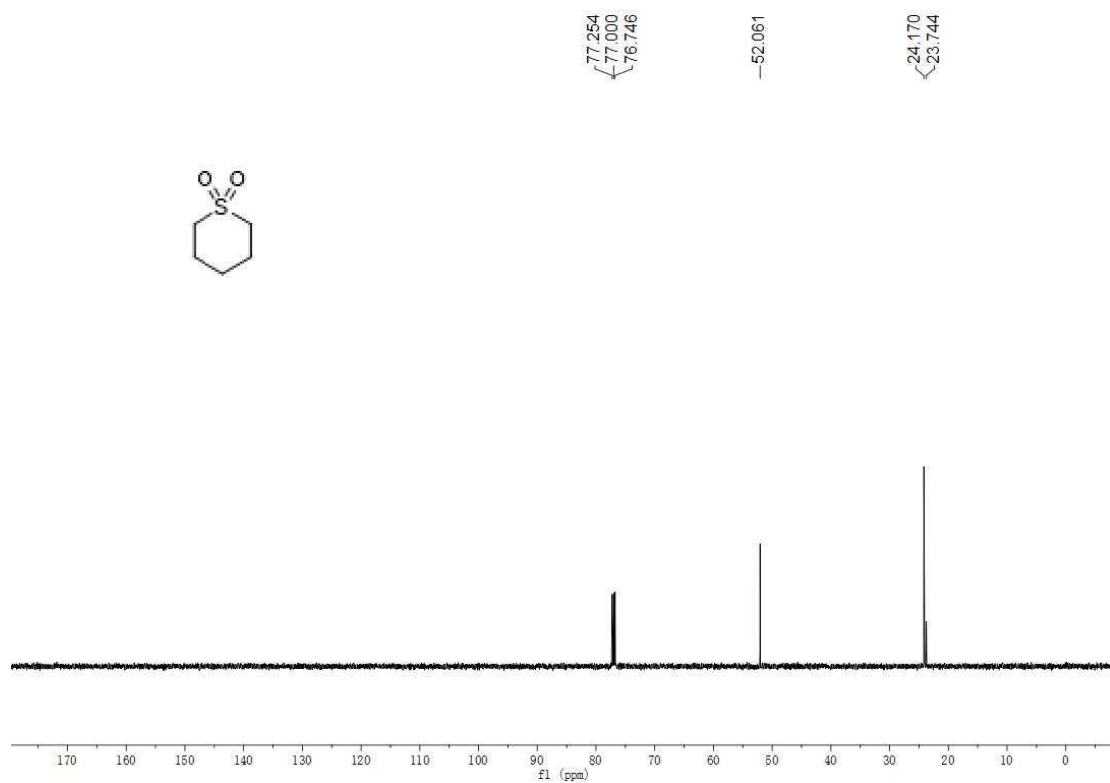

**<sup>13</sup>C NMR (125 MHz, CDCl<sub>3</sub>)**

## 2-(methylsulfonyl)pyridine (2t)

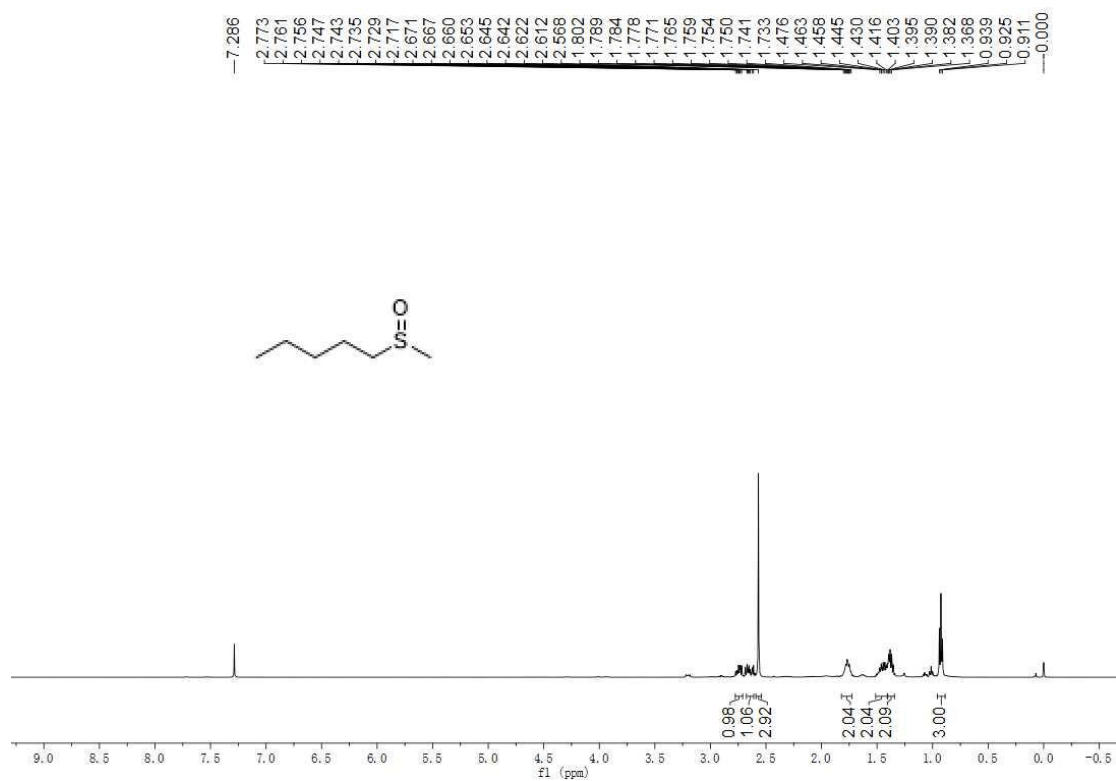

## <sup>1</sup>H NMR (500 MHz, CDCl<sub>3</sub>)

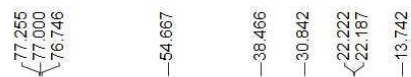

## <sup>13</sup>C NMR (125 MHz, CDCl<sub>3</sub>)

# 1-(methylsulfonyl)pentane (3t)

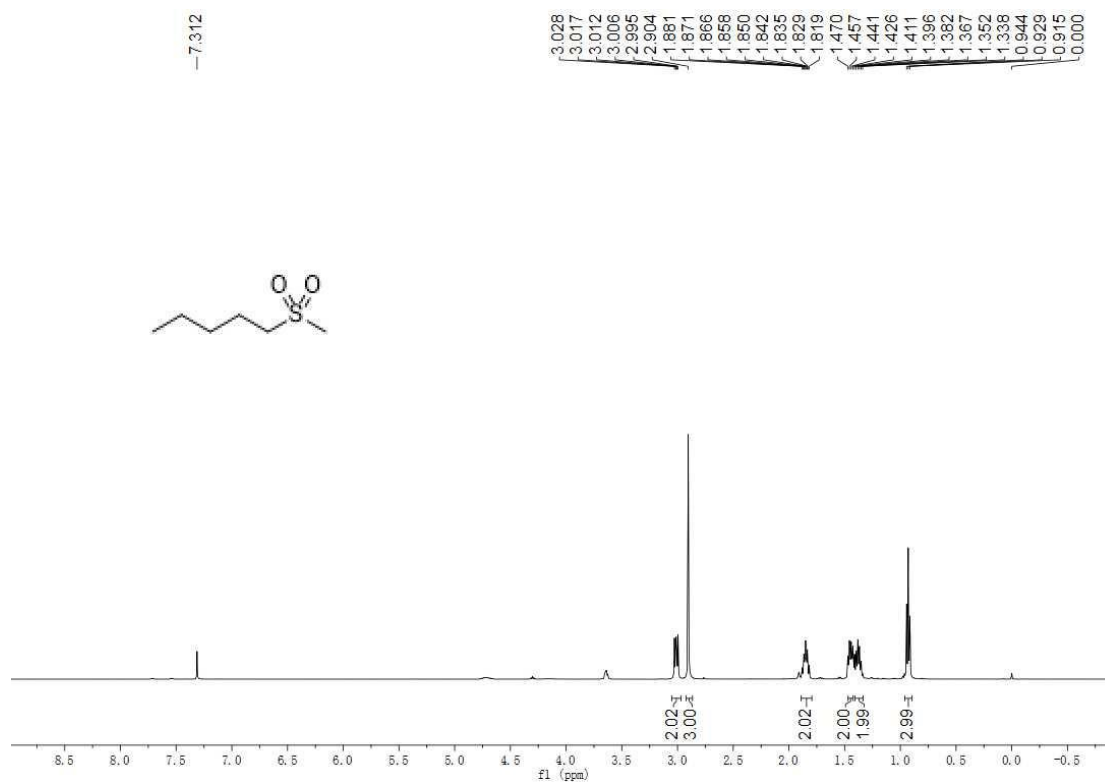

## $^1\text{H NMR}$ (500 MHz, $\text{CDCl}_3$ )

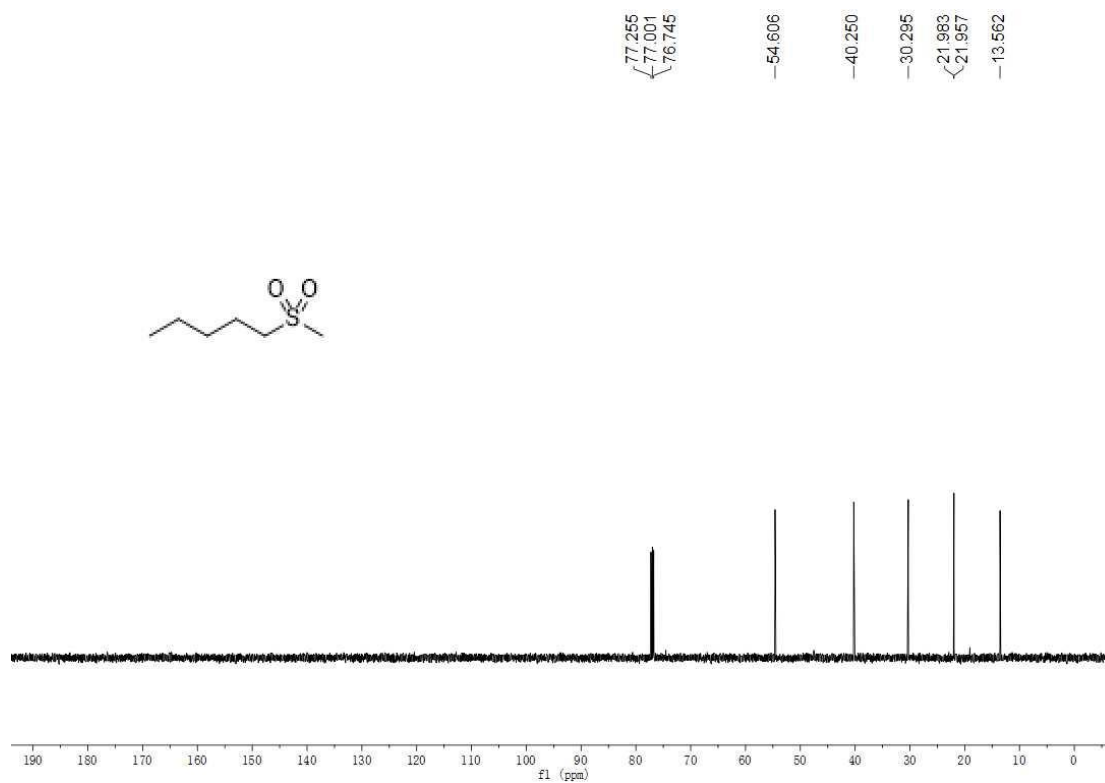

## $^{13}\text{C NMR}$ (125 MHz, $\text{CDCl}_3$ )

### 4-(methylsulfinyl)phenyl 2-(4-isobutylphenyl)propanoate (4a)

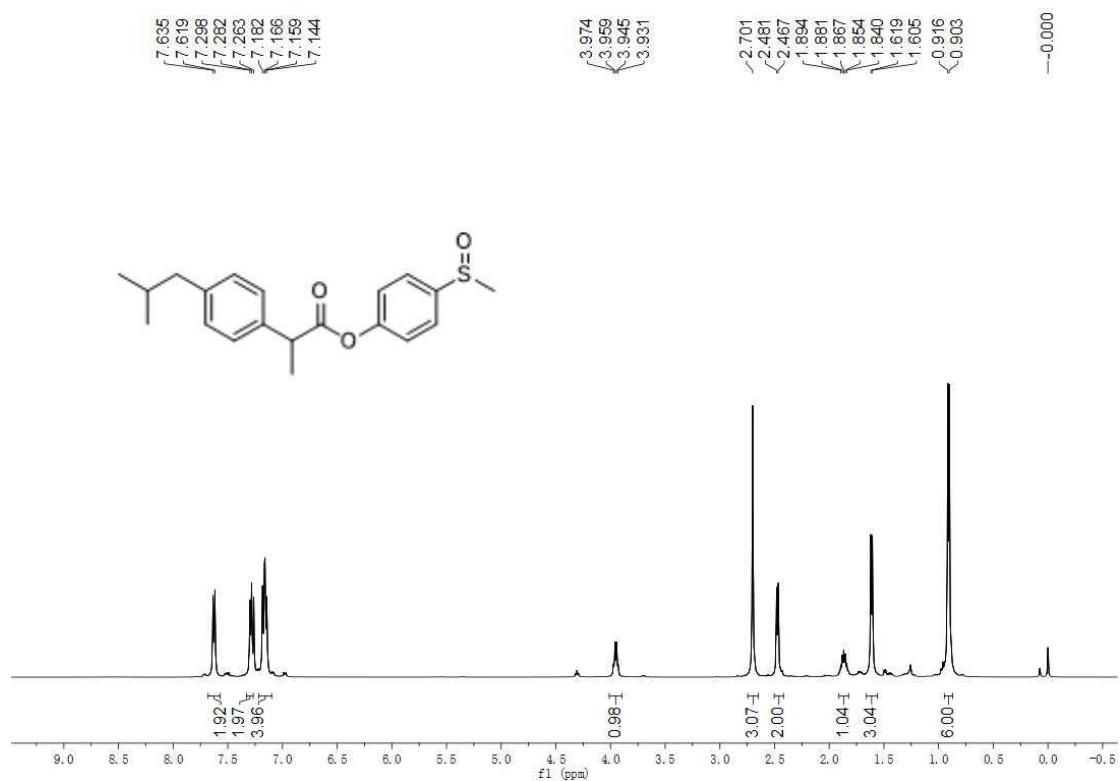

### <sup>1</sup>H NMR (500 MHz, CDCl<sub>3</sub>)

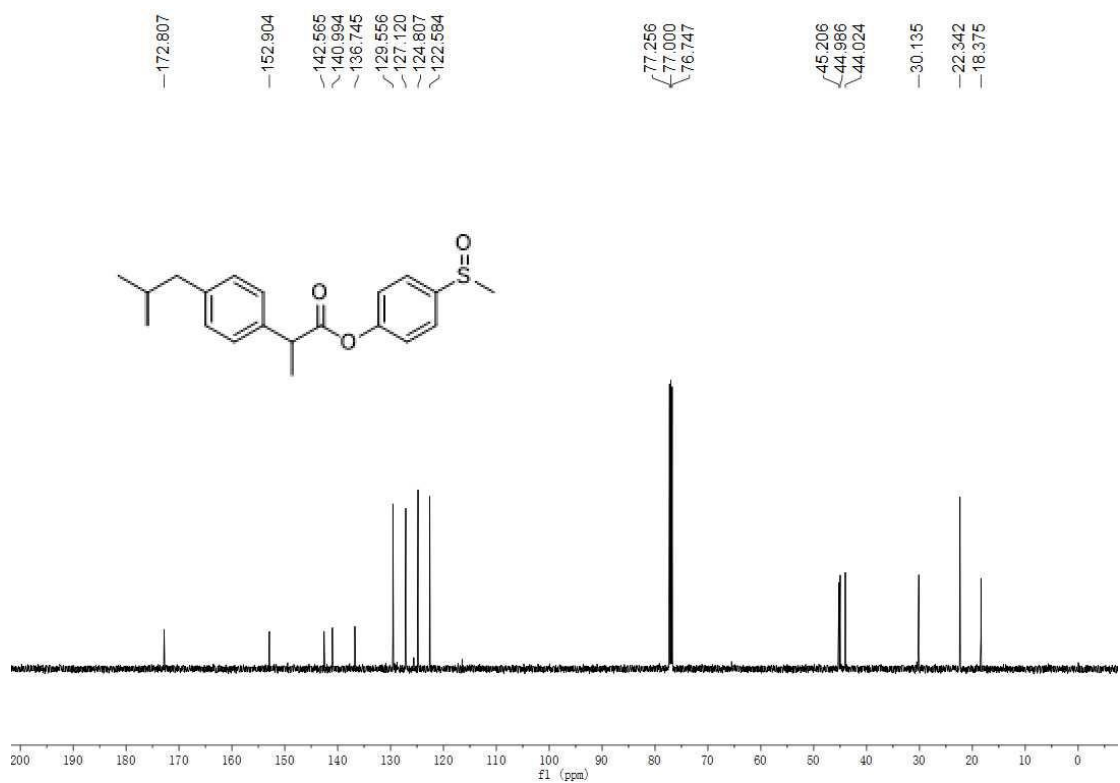

### <sup>13</sup>C NMR (125 MHz, CDCl<sub>3</sub>)

### 4-(methylsulfonyl)phenyl 2-(4-isobutylphenyl)propanoate (4b)

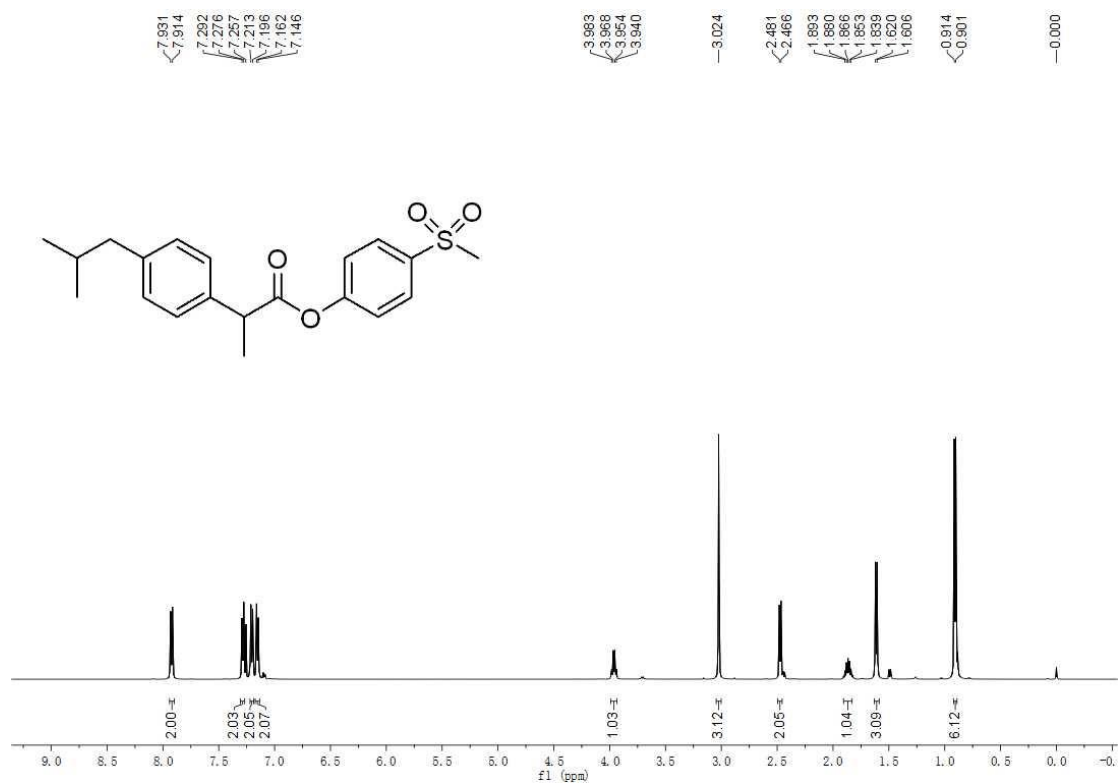

### <sup>1</sup>H NMR (500 MHz, CDCl<sub>3</sub>)

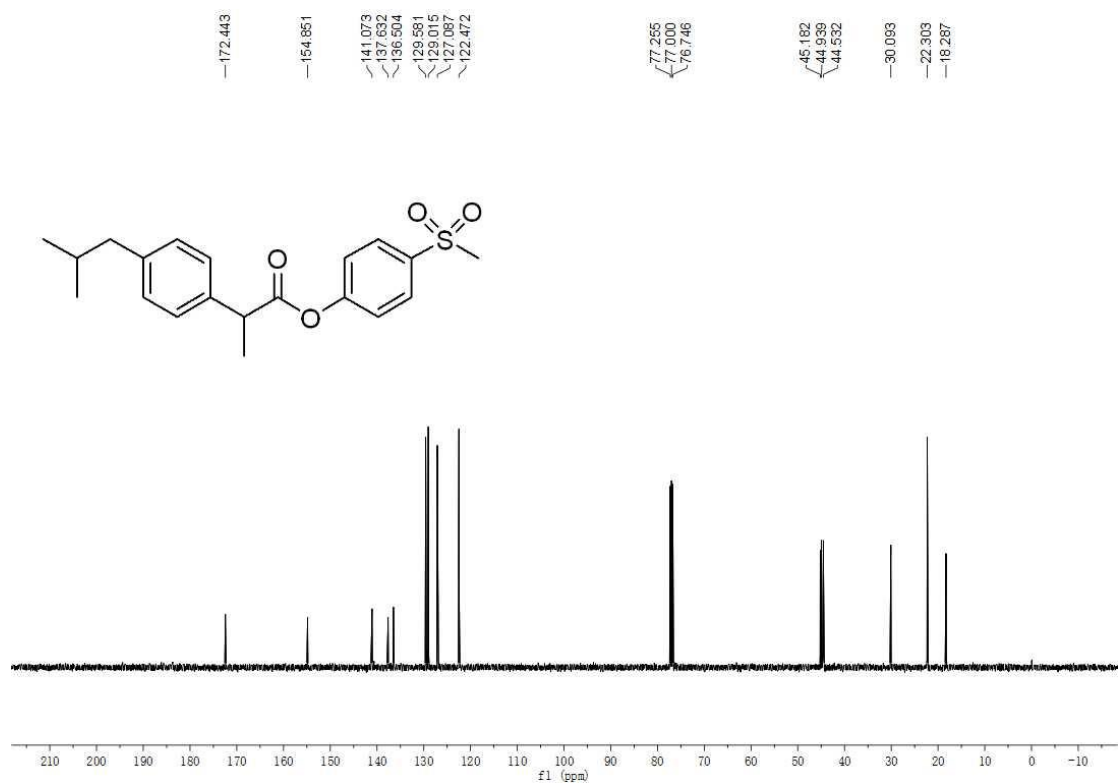

### <sup>13</sup>C NMR (125 MHz, CDCl<sub>3</sub>)



## 2-((4-methoxyphenyl)sulfonyl)-1,3,5-trimethylbenzene (4c)

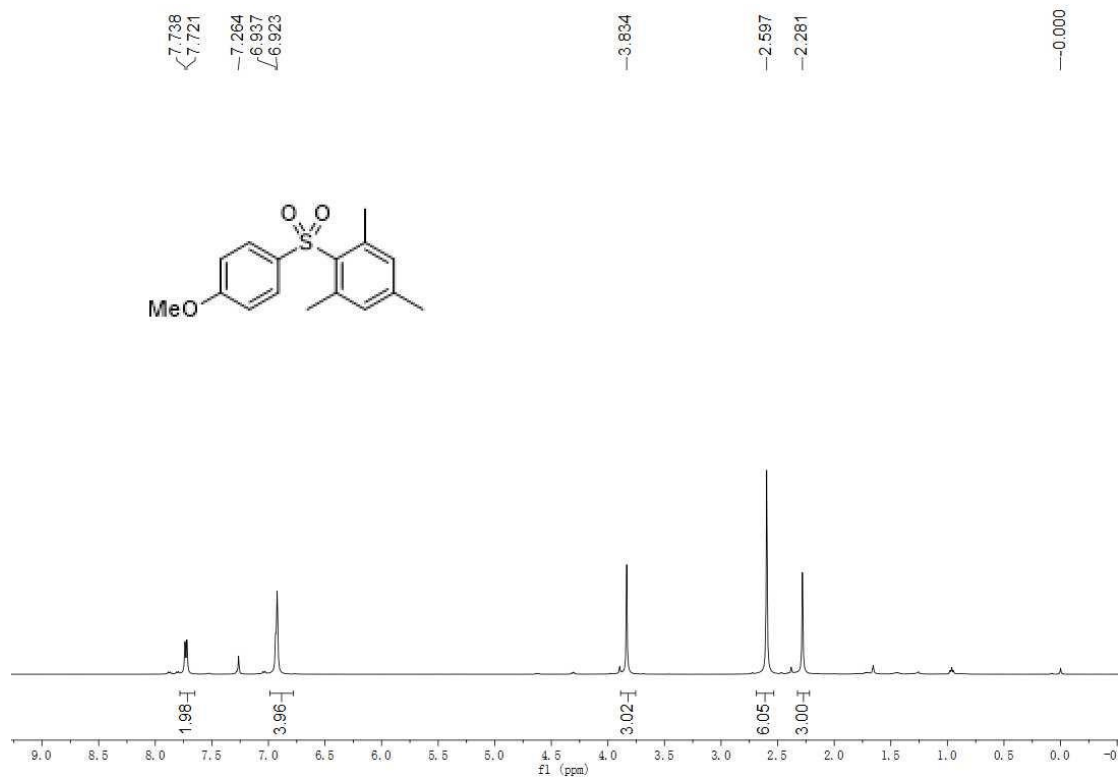

## <sup>1</sup>H NMR (500 MHz, CDCl<sub>3</sub>)

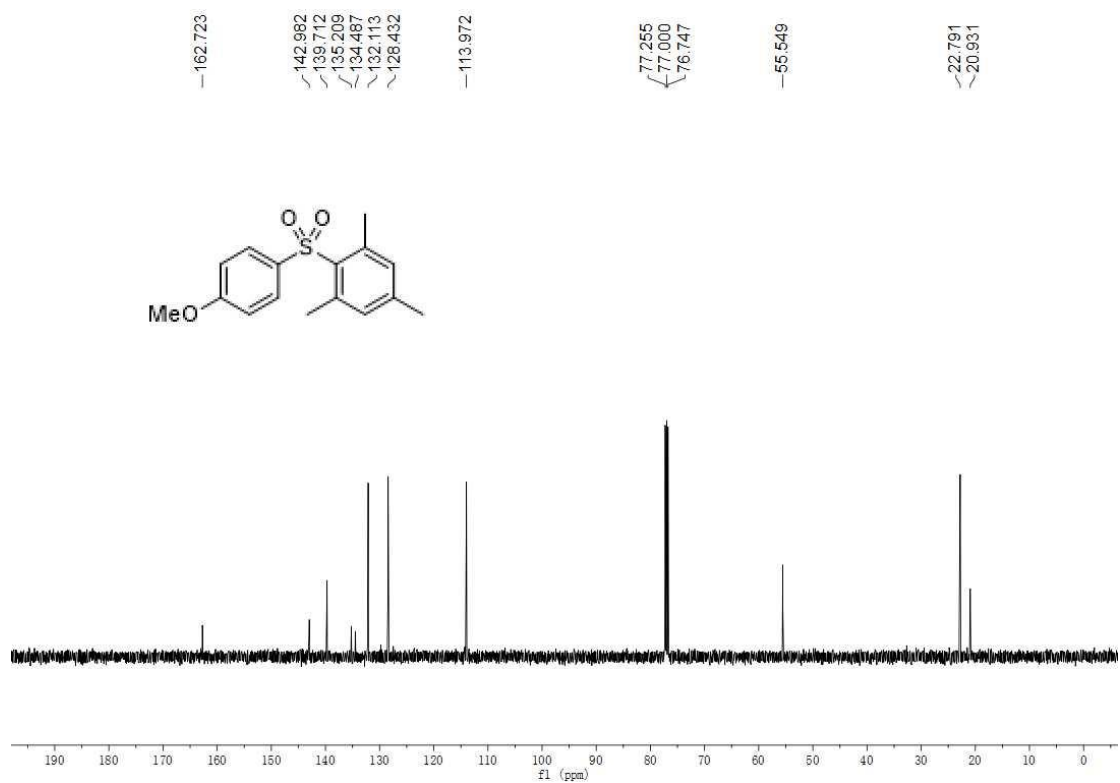

### 4-(4-(methylsulfonyl)phenyl)-3-phenylfuran-2(5H)-one (4d)

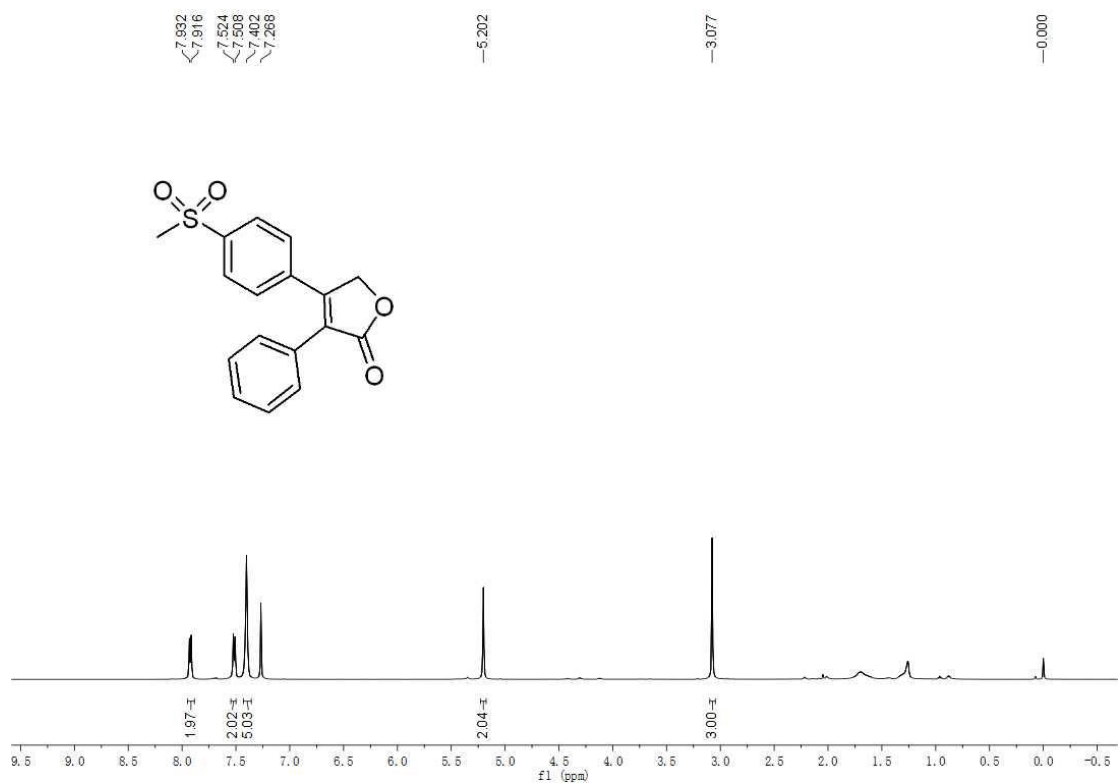

<sup>1</sup>H NMR (500 MHz, CDCl<sub>3</sub>)

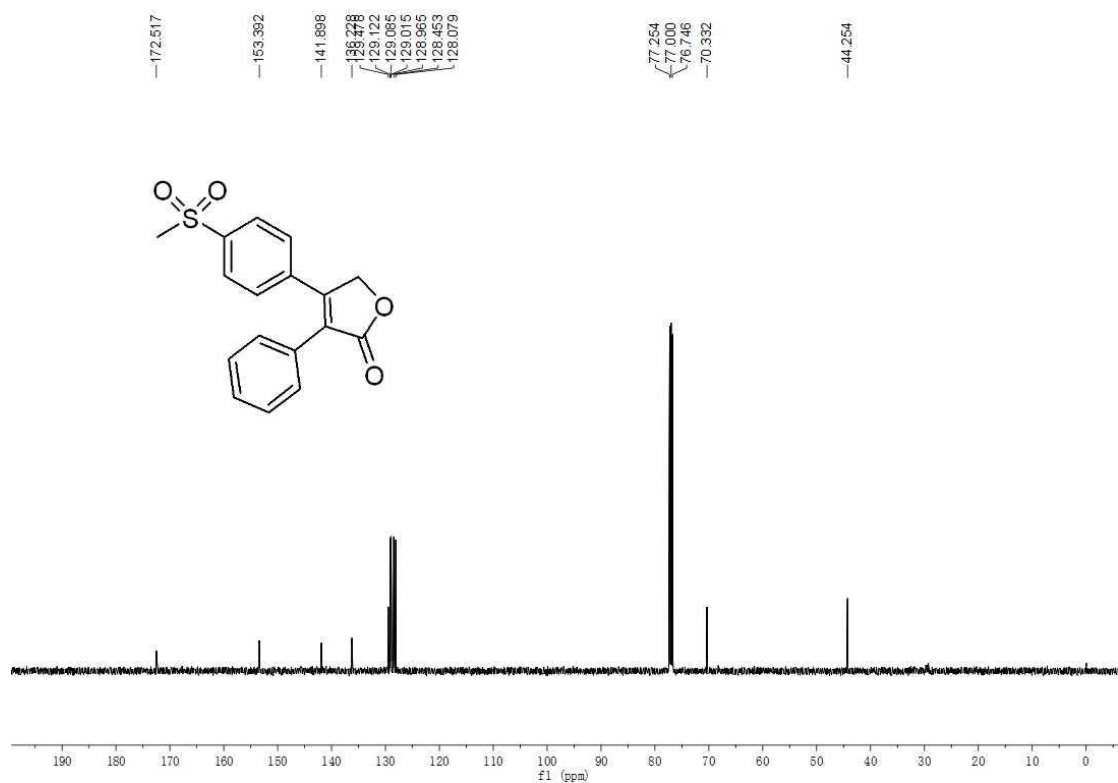

<sup>13</sup>C NMR (125 MHz, CDCl<sub>3</sub>)

### 4-(methylsulfinyl)phenyl5-(2,5-dimethylphenoxy)-2,2-dimethylpentanoate (4e)

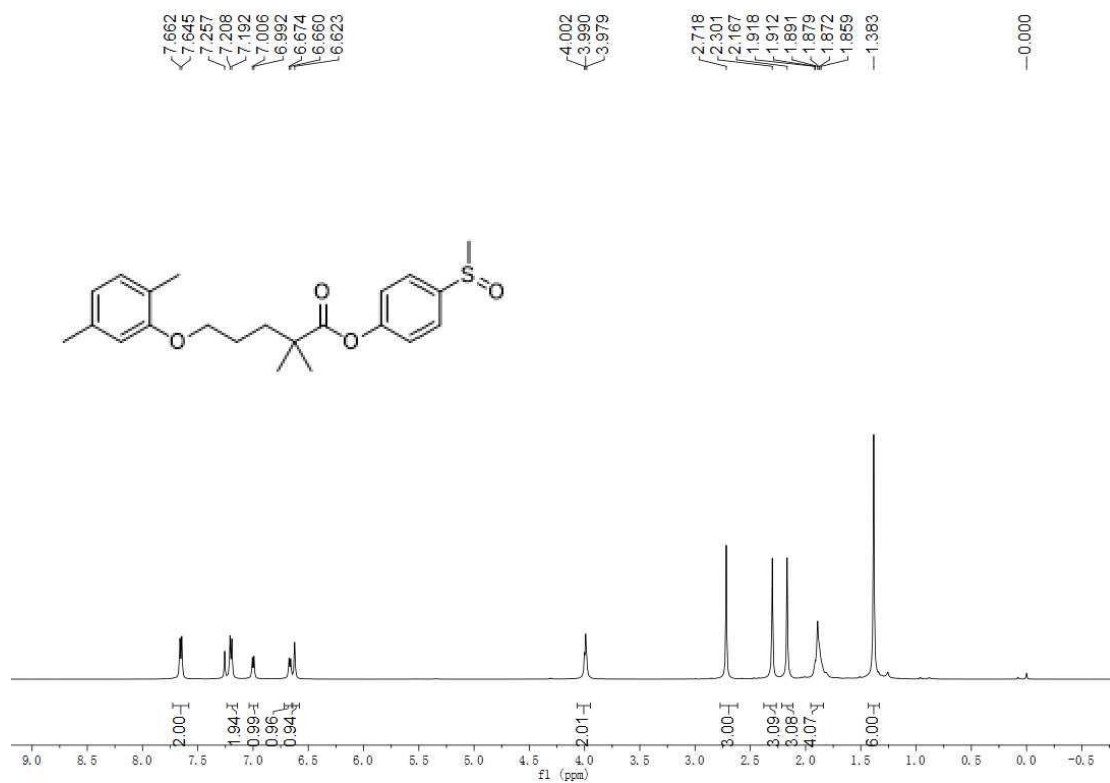

<sup>1</sup>H NMR (500 MHz, CDCl<sub>3</sub>)

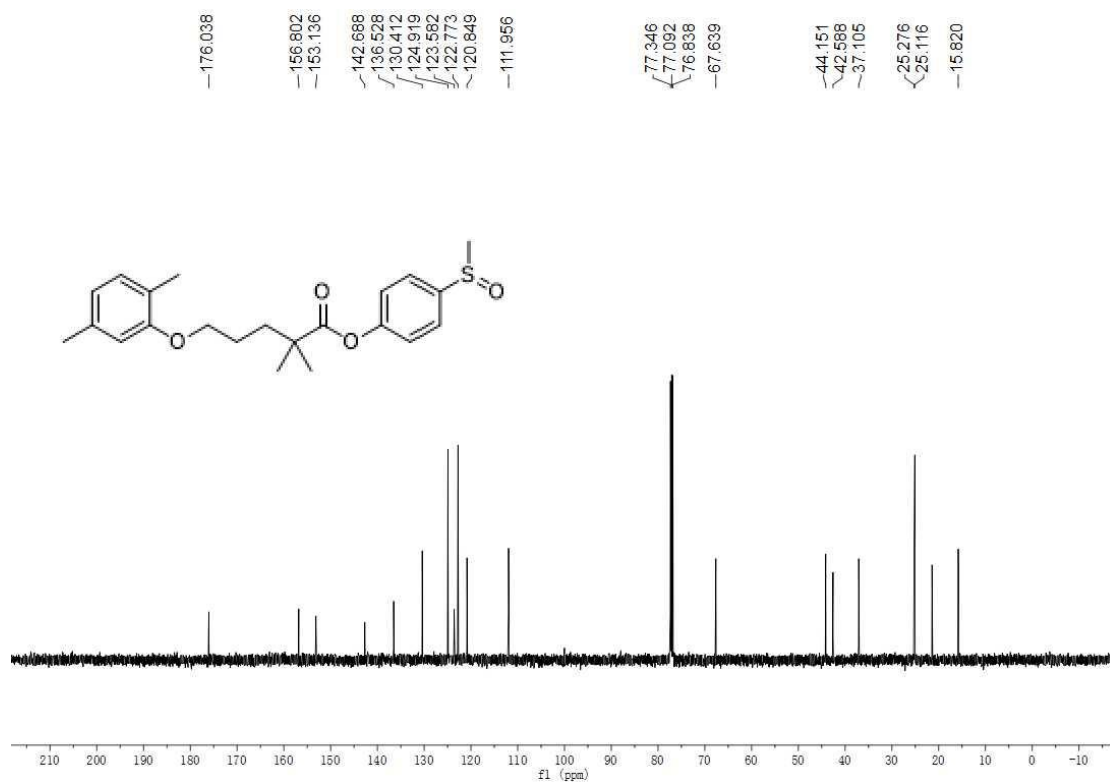

<sup>13</sup>C NMR (125 MHz, CDCl<sub>3</sub>)

### 4-(methylsulfonyl)phenyl 5-(2,5-dimethylphenoxy)-2,2-dimethylpentanoate (4f)

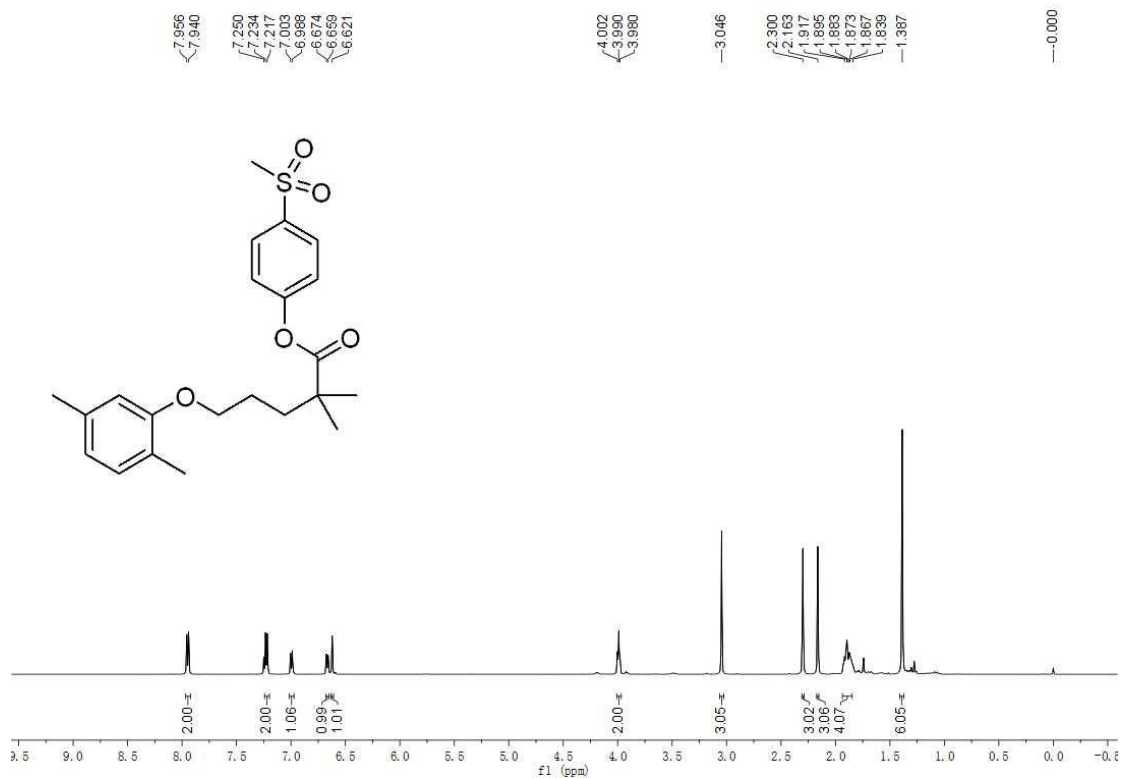

<sup>1</sup>H NMR (500 MHz, CDCl<sub>3</sub>)

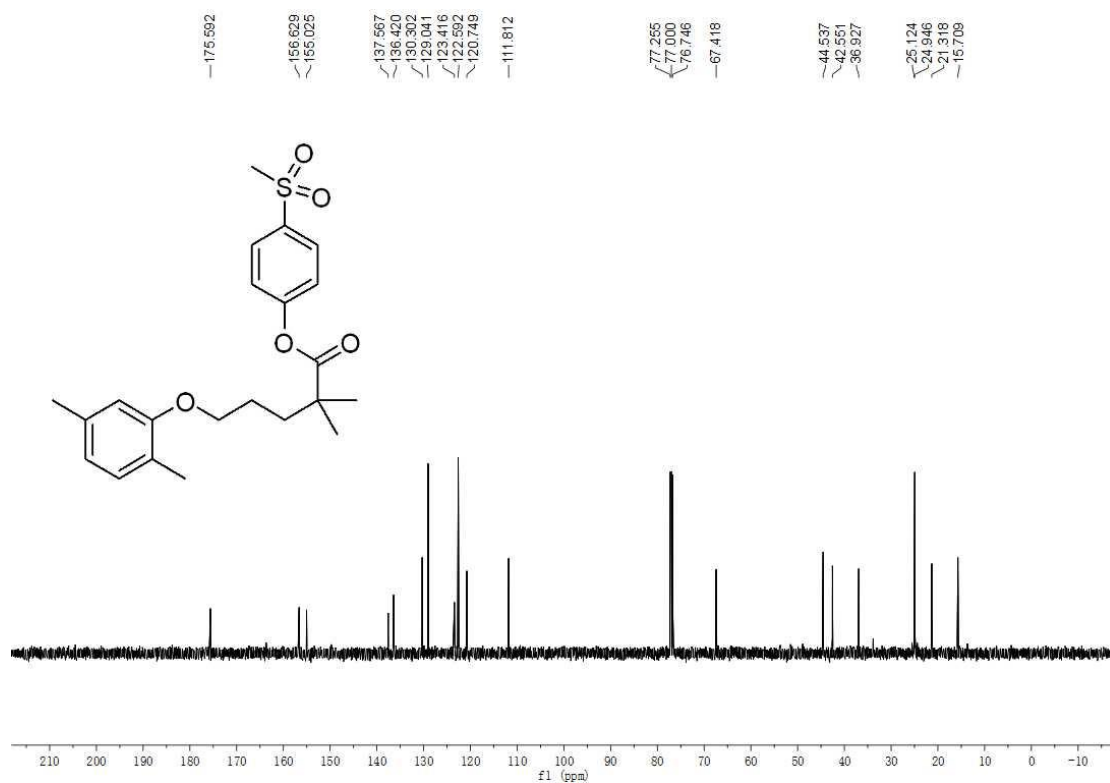

<sup>13</sup>C NMR (125 MHz, CDCl<sub>3</sub>)

## (E) References

- (1) Y. Yang, Z. Chen and Y. Rao, The Synthesis of Diarylsulfones with Simple Arenes and  $K_2S_2O_8$  through Double C–S Bond Formation, *Chem. Commun.*, 2014, **50**, 15037-15040.
- (2) Z. Cheng, P. Sun, A. Tang, W. Jin and C. Liu, Switchable Synthesis of Aryl Sulfones and Sulfoxides through Solvent-Promoted Oxidation of Sulfides with  $O_2$ /Air, *Org. Lett.*, 2019, **21**, 8925-8929.
- (3) S. Gan, J. Yin, Y. Yao, Y. Liu, D. Chang, D. Zhu, L. Shi, Metal- and Additive-Free Oxygen-Atom Transfer Reaction: an Efficient and Chemoselective Oxidation of Sulfides to Sulfoxides with Cyclic Diacyl Peroxides, *Org. Biomol. Chem.*, 2017, **15**, 2647-2654.
- (4) Y. Li, S. A. Rizvi, D. Hu, D. Sun, A. Gao, Y. Zhou, J. Li and X. Jiang, Selective Late-Stage Oxygenation of Sulfides with Ground-State Oxygen by Uranyl Photocatalysis, *Angew. Chem., Int. Ed.*, 2019, **58**, 13499-13506.
- (5) C. Li, N. Mizuno, K. Murata, K. Ishii, T. Suenobu, K. Yamaguchi and K. Suzuki, Selectivity Switch in the Aerobic Oxygenation of Sulfides Photocatalysed by Visible-Light-Responsive Decavanadate, *Green Chem.*, 2020, **22**, 3896-3905.
- (6) K.-J. Liu, Z. Wang, L.-H. Lu, J.-Y. Chen, F. Zeng, Y.-W. Lin, Z. Cao, X. Yu and W.-M. He, Synergistic Cooperative Effect of  $CF_3SO_2Na$  and Bis(2-butoxyethyl)ether Towards Selective Oxygenation of Sulfides with Molecular Oxygen under Visible-Light Irradiation, *Green Chem.*, 2021, **23**, 496-500.
